# Supplementary material for: Identification of Candidate Protein Biomarkers for CIN2+ Lesions from Self-Sampled, Dried Cervico–Vaginal Fluid Using LC-MS/MS
Source: Cancers (Basel). 2021 May 25;13(11):2592. doi: 10.3390/cancers13112592 (PMC8198222; doi:10.3390/cancers13112592)
Supplement: Supplementary file 1 [file cancers-13-02592-s001.zip]

Archive with 4 entries (4 files):
- __MACOSX/._ALG_SupplementaryTable1.xlsx
- __MACOSX/._ALG_supplFigure_S1.docx
- ALG_SupplementaryTable1.xlsx
- ALG_supplFigure_S1.pdf
