# Supplementary material for: Identification of Candidate Protein Biomarkers for CIN2+ Lesions from Self-Sampled, Dried Cervico–Vaginal Fluid Using LC-MS/MS
Source: Cancers (Basel). 2021 May 25;13(11):2592. doi: 10.3390/cancers13112592 (PMC8198222; doi:10.3390/cancers13112592)
Supplement: Supplementary file 1 [file cancers-13-02592-s001.zip › ALG_SupplementaryTable1.xlsx]

## Sheet: Table S1
Protein Identifiers		Nr. Obeservations above detection limits					Mean values and foldchange (case over control) after individual normalization						Univariate (QC & Pvalues)				Binomial (highcount and pvalues)
uniprotID	ns	dCtrl_nonZeroObs	dCase_nonZeroObs	rCtrl_nonZeroObs	rCase1_nonZeroObs	rCase2_nonZeroObs	meanCtrlD	meanCaseD	meanFoldD	meanCtrlR	meanCaseR	meanFoldR	qcD	qcR	pvalDisc	pvalRepl	higerDectCaseDisc	pvalDiscBinom	higerDectCaseRepl	pvalReplBinom
P35326	SPRR2A	18	19	19	20	19	0.00141836	0.00568093	4.00529	0.00204263	0.00322048	1.57664	1	1	0.000918868	0.16534	1	1	1	1
P02533	KRT14	19	20	20	20	19	0.000500909	0.00133618	2.66752	0.00678406	0.0119005	1.75419	1	1	0.00116007	0.191751	1	1	0	1
P08779	KRT16	20	20	18	19	19	0.00314726	0.00831767	2.64283	0.00137575	0.00249143	1.81096	1	1	0.00388501	0.379242	0	1	1	1
P35321	SPRR1A	20	20	20	20	19	0.00387155	0.00809541	2.091	0.00427536	0.00628547	1.47016	1	1	0.010314	0.173829	0	1	0	1
P22528	SPRR1B	19	18	17	20	19	0.000572646	0.00120619	2.10634	0.000522912	0.00085608	1.63714	1	1	0.0105666	0.13321	0	1	1	0.230769
P47929	LGALS7B	18	20	18	16	18	0.00158674	0.00308479	1.94411	0.00120396	0.00156744	1.30191	1	1	0.0166637	0.524305	1	0.487179	0	0.66142
P14923	JUP	20	20	20	20	19	0.00383527	0.0068889	1.7962	0.00463616	0.00679981	1.46669	1	1	0.0180936	0.108077	0	1	0	1
Q13835	PKP1	18	20	19	18	19	0.00144311	0.00319808	2.2161	0.0020725	0.00299992	1.44748	1	1	0.0207286	0.189461	1	0.487179	0	1
P15924	DSP	20	20	20	20	19	0.00908241	0.0181901	2.00278	0.01165	0.0171096	1.46863	1	1	0.0210768	0.127419	0	1	0	1
P22735	TGM1	18	20	17	17	19	0.00085369	0.00154201	1.80629	0.000720485	0.00110802	1.53788	1	1	0.0222636	0.0782131	1	0.487179	0	1
Q9Y446	PKP3	18	18	19	19	19	0.000282528	0.000579913	2.05258	0.000376048	0.000534473	1.42129	1	1	0.0238372	0.104572	0	1	0	1
P19957	PI3	15	17	16	17	19	0.000518302	0.001472	2.84004	0.000466413	0.000632412	1.35591	1	1	0.0259541	0.363578	1	0.694765	1	1
P32926	DSG3	17	18	18	18	19	0.0005842	0.00107738	1.84421	0.000717463	0.00108226	1.50845	1	1	0.033551	0.119682	1	1	0	1
Q9UBG3	CRNN	20	20	20	20	19	0.00996267	0.0166844	1.67469	0.0102815	0.01362	1.32471	1	1	0.0350107	0.231499	0	1	0	1
P51659	HSD17B4	15	18	18	17	18	4.47479e-05	7.35313e-05	1.64324	4.57524e-05	5.42283e-05	1.18526	1	1	0.0433268	0.336462	1	0.407484	0	1
P04264	KRT1	20	20	20	20	19	0.0289606	0.0586447	2.02498	0.0380754	0.0624068	1.63903	1	1	0.0459542	0.264832	0	1	0	1
Q6ZN66	GBP6	15	18	17	16	19	0.000652134	0.00111453	1.70905	0.000872395	0.0009762	1.11899	1	1	0.046215	0.615846	1	0.407484	0	1
O00571,O15523,Q9NQI0	DDX3X,DDX3Y,DDX4	20	20	20	20	19	8.37599e-05	0.000109659	1.30921	9.62136e-05	0.000124477	1.29375	1	1	0.0490903	0.0244677	0	1	0	1
O60218	AKR1B10	16	19	18	17	19	0.000410841	0.000708848	1.72536	0.000485895	0.000545105	1.12186	1	1	0.0528802	0.655059	1	0.341649	0	1
Q02487	DSC2	16	18	19	18	19	0.000482701	0.000771417	1.59813	0.000527766	0.000724491	1.37275	1	1	0.0561114	0.285214	1	0.66142	0	1
P63167	DYNLL1	17	17	19	18	18	0.000211689	0.000304091	1.4365	0.000222336	0.000238424	1.07236	1	1	0.0578778	0.655301	0	1	0	1
O15231	ZNF185	20	20	20	20	19	0.000577538	0.000785348	1.35982	0.000468519	0.000615136	1.31294	1	1	0.0634324	0.114254	0	1	0	1
Q8WWI1	LMO7	18	20	15	18	19	0.000190713	0.00041853	2.19455	0.000126671	0.000232562	1.83595	1	1	0.0678553	0.112603	1	0.487179	1	0.407484
Q07065	CKAP4	18	19	16	18	19	0.000113385	0.000186281	1.6429	8.17465e-05	0.000129402	1.58297	1	1	0.071992	0.179861	1	1	1	0.66142
A8K2U0	A2ML1	19	20	19	20	19	0.00200246	0.00316994	1.58302	0.00251151	0.00302816	1.20571	1	1	0.0762662	0.25338	1	1	1	1
Q14134	TRIM29	20	20	19	19	19	0.000333497	0.000560321	1.68014	0.000354611	0.000503224	1.41909	1	1	0.0762662	0.0199963	0	1	0	1
Q9Y4K1	CRYBG1	16	18	18	16	19	7.07522e-05	0.000109896	1.55324	5.85073e-05	9.35016e-05	1.59812	1	1	0.0903769	0.139768	1	0.66142	0	0.66142
P13647	KRT5	20	20	20	20	19	0.0163396	0.0215257	1.3174	0.0224186	0.023161	1.03311	1	1	0.0964996	0.301253	0	1	0	1
P29692	EEF1D	20	20	19	20	18	0.000124856	0.000162392	1.30064	0.000109577	0.00014468	1.32035	1	1	0.102161	0.0227187	0	1	1	1
Q96P63	SERPINB12	17	16	17	15	17	0.000185419	0.000348386	1.87891	0.000185768	0.000323218	1.7399	1	0	0.112603	0.265516	0	1	0	0.694765
P20340,Q9NRW1,Q53S08	RAB6A,RAB6B,RAB6D	17	20	16	19	19	0.000138914	0.000187053	1.34654	0.000128322	0.000184095	1.43464	1	1	0.113484	0.00898076	1	0.230769	1	0.341649
P13645,Q7Z3Y7,Q7Z3Y8,Q7Z3Z0,Q7Z3Y9	KRT10,KRT28,KRT27,KRT25,KRT26	20	20	0	0	0	0.00442495	0.00868163	1.96197	NaN	NaN	NA	1	0	0.114254	NA	0	1	0	1
P62979,P62987,P0CG47,P0CG48	RPS27A,UBA52,UBB,UBC	20	20	20	20	19	0.000905773	0.00111437	1.2303	0.00078851	0.00104237	1.32195	1	1	0.114254	0.00321093	0	1	0	1
Q01469,A8MUU1	FABP5,FABP5P3	20	20	20	20	19	0.00568021	0.00832699	1.46597	0.00492815	0.00533284	1.08212	1	1	0.114254	0.799407	0	1	0	1
Q92817,A8MZ36	EVPL,EVPLL	20	20	20	20	19	0.00316308	0.00482461	1.52529	0.00264488	0.00343129	1.29733	1	1	0.1207	0.0809763	0	1	0	1
P03973	SLPI	18	18	19	16	19	0.000142033	0.000257676	1.8142	0.000290985	0.00017703	0.608383	1	1	0.133101	0.155182	0	1	0	0.341649
O95274	LYPD3	20	20	20	19	19	0.000229272	0.000297333	1.29685	0.000162619	0.000200061	1.23024	1	1	0.134419	0.201194	0	1	0	1
Q04695	KRT17	18	16	19	19	18	0.000127006	0.000257209	2.02516	0.00025721	0.000694951	2.70189	1	1	0.147181	0.417055	0	0.66142	0	1
Q14116	IL18	19	19	16	16	18	0.000123623	0.000152389	1.23269	9.47052e-05	0.000118281	1.24894	1	1	0.151652	0.615379	0	1	0	1
P31947	SFN	20	20	20	20	19	0.00451558	0.00632346	1.40036	0.0024905	0.00304985	1.2246	1	1	0.15716	0.301253	0	1	0	1
P62140	PPP1CB	15	18	20	19	19	6.60761e-05	8.78621e-05	1.32971	0.000123633	0.000129179	1.04486	1	1	0.162488	0.678306	1	0.407484	0	1
Q9BW04	SARG	16	19	17	16	17	7.09154e-05	0.000138913	1.95886	4.31191e-05	8.92765e-05	2.07046	1	1	0.1632	0.146781	1	0.341649	0	1
P67936	TPM4	20	20	20	20	19	0.000374552	0.000507899	1.35602	0.00024577	0.000277272	1.12818	1	1	0.16534	0.529097	0	1	0	1
Q93009	USP7	17	18	12	12	9	0.000347699	0.000449342	1.29233	0.000407501	0.000412596	1.01251	1	0	0.171527	0.94428	1	1	0	1
Q96HE7,Q86YB8	ERO1A,ERO1B	20	20	20	20	19	0.00120526	0.00171591	1.42369	0.0011179	0.00144122	1.28922	1	1	0.173829	0.25338	0	1	0	1
Q6UWP8	SBSN	16	18	17	16	19	0.00044173	0.000630316	1.42693	0.000638398	0.000772239	1.20965	1	1	0.179861	0.392925	1	0.66142	0	1
Q8TE68	EPS8L1	18	20	20	19	19	0.000277307	0.000383501	1.38295	0.000212503	0.000286637	1.34886	1	1	0.180557	0.141705	1	0.487179	0	1
Q9UBC9	SPRR3	20	20	20	20	19	0.0355576	0.0513691	1.44467	0.0402088	0.0457642	1.13817	1	1	0.182631	0.678306	0	1	0	1
Q9UIV8	SERPINB13	19	20	19	19	19	0.000471206	0.000671514	1.4251	0.000436632	0.000533732	1.22238	1	1	0.182631	0.417055	1	1	0	1
O60437	PPL	20	20	20	20	19	0.00763644	0.0105319	1.37916	0.00610205	0.00830689	1.36133	1	1	0.191751	0.1207	0	1	0	1
Q86T26	TMPRSS11B	17	18	17	18	18	0.000360229	0.000420772	1.16807	0.000264218	0.00031823	1.20442	1	1	0.208026	0.616444	1	1	1	1
P48594	SERPINB4	18	19	19	18	19	0.000604139	0.000872547	1.44428	0.000491786	0.000537718	1.0934	1	1	0.208368	0.714929	1	1	0	1
O95171	SCEL	18	20	20	20	19	0.000810848	0.00107456	1.32524	0.000607949	0.000731105	1.20258	1	1	0.208432	0.444964	1	0.487179	0	1
P04080	CSTB	20	20	20	20	19	0.00459053	0.00556543	1.21237	0.00377495	0.00427727	1.13307	1	1	0.210964	0.883057	0	1	0	1
P35222	CTNNB1	18	18	16	18	19	0.000118705	0.000155022	1.30594	0.00010225	0.000146551	1.43327	1	1	0.239103	0.0272296	0	1	1	0.66142
Q9NVJ2	ARL8B	20	18	18	17	17	5.14504e-05	5.65409e-05	1.09894	3.99482e-05	4.11924e-05	1.03115	1	1	0.239302	0.364391	0	0.487179	0	1
P26641	EEF1G	20	20	20	20	19	0.000371698	0.000413377	1.11213	0.000318306	0.000406619	1.27745	1	1	0.24227	0.00561777	0	1	0	1
Q8N1N4	KRT78	19	20	20	20	19	0.00444993	0.00644447	1.44822	0.00430132	0.00528716	1.22919	1	1	0.24227	0.24227	1	1	0	1
P06702	S100A9	20	20	20	20	19	0.0272495	0.031965	1.17305	0.0277355	0.0231112	0.833272	1	1	0.25338	0.210964	0	1	0	1
P27482	CALML3	20	20	0	0	0	0.00157441	0.00199111	1.26467	NaN	NaN	NA	1	0	0.264832	NA	0	1	0	1
P49327	FASN	20	20	20	20	19	0.000535269	0.000713989	1.33389	0.000555323	0.000685055	1.23362	1	1	0.264832	0.301253	0	1	0	1
O00391	QSOX1	19	19	19	17	18	6.97114e-05	7.65745e-05	1.09845	9.69997e-05	7.19239e-05	0.741486	1	1	0.267385	0.267183	0	1	0	0.60499
Q99961,Q99962	SH3GL1,SH3GL2	17	18	13	15	14	3.87162e-05	4.64192e-05	1.19896	2.26815e-05	3.11325e-05	1.37259	1	0	0.272835	0.260912	1	1	1	0.731094
P01040	CSTA	18	20	20	20	18	0.000945195	0.00121152	1.28177	0.000868927	0.00084247	0.969551	1	1	0.273263	0.968002	1	0.487179	0	1
P61981	YWHAG	20	20	20	20	16	9.5247e-05	9.99568e-05	1.04945	7.80132e-05	8.5823e-05	1.10011	1	1	0.276627	0.841013	0	1	0	1
Q16610	ECM1	20	20	19	19	19	0.000941341	0.00113528	1.20603	0.000702369	0.000733768	1.0447	1	1	0.276627	0.588489	0	1	0	1
P29508	SERPINB3	20	20	20	20	19	0.00560009	0.00756079	1.35012	0.00491103	0.00472042	0.961187	1	1	0.301253	0.841013	0	1	0	1
P29373,P29762	CRABP2,CRABP1	20	19	19	20	19	0.00113226	0.0013571	1.19858	0.000893567	0.00104451	1.16892	1	1	0.314084	0.601662	0	1	1	1
O43175	PHGDH	20	20	19	20	19	0.000407924	0.00048548	1.19012	0.000344039	0.000437023	1.27027	1	1	0.327262	0.173829	0	1	1	1
O75396	SEC22B	19	20	19	19	19	4.89021e-05	5.82167e-05	1.19047	4.41432e-05	4.89404e-05	1.10867	1	1	0.327262	0.372021	1	1	0	1
P13639	EEF2	20	20	20	20	19	0.00146553	0.00165541	1.12957	0.00106595	0.00136033	1.27616	1	1	0.327262	0.0180936	0	1	0	1
P30153,P30154	PPP2R1A,PPP2R1B	20	20	20	20	19	0.000346158	0.000406812	1.17522	0.000285894	0.000315762	1.10447	1	1	0.340785	0.413526	0	1	0	1
P52272	HNRNPM	20	20	20	20	19	0.000215031	0.000347822	1.61754	0.000158407	0.000160297	1.01193	1	1	0.340785	0.71795	0	1	0	1
P19013	KRT4	20	20	20	20	19	0.0887519	0.107549	1.21179	0.0768929	0.0839095	1.09125	1	1	0.354652	0.477691	0	1	0	1
P31151,Q86SG5	S100A7,S100A7A	20	20	0	0	0	0.0011912	0.00263678	2.21355	NaN	NaN	NA	1	0	0.354652	NA	0	1	0	1
P63241,Q9GZV4,Q6IS14	EIF5A,EIF5A2,EIF5AL1	20	19	0	0	0	0.000290016	0.000315733	1.08868	NaN	NaN	NA	1	0	0.354652	NA	0	1	0	1
P20930	FLG	18	20	20	20	19	0.000215821	0.000516494	2.39316	0.000450586	0.000521084	1.15646	1	1	0.364819	0.620465	1	0.487179	0	1
Q9H6S3	EPS8L2	20	20	18	20	18	0.000158635	0.000177006	1.11581	0.000250703	0.000414997	1.65533	1	1	0.368862	0.0179332	0	1	1	0.487179
O95833	CLIC3	20	20	19	20	19	0.00041721	0.000525469	1.25948	0.000355598	0.000454544	1.27825	1	1	0.398302	0.141705	0	1	1	1
P14314	PRKCSH	20	20	14	16	12	6.69854e-05	7.63571e-05	1.13991	2.78076e-05	4.11452e-05	1.47964	1	0	0.398302	0.00922743	0	1	1	0.716427
P16615,O14983	ATP2A2,ATP2A1	20	20	20	19	19	0.000173242	0.000189619	1.09453	0.000107268	0.000143743	1.34004	1	1	0.398302	0.0401751	0	1	0	1
P32320	CDA	16	19	18	18	18	0.000108075	0.000125799	1.164	0.000134413	8.17904e-05	0.608501	1	1	0.408916	0.0192357	1	0.341649	0	1
Q9BUF5	TUBB6	17	17	17	16	18	3.2867e-05	3.85037e-05	1.1715	2.26105e-05	2.56672e-05	1.13519	1	1	0.416311	0.755119	0	1	0	1
P62913	RPL11	17	18	17	17	18	8.9759e-05	0.00010013	1.11555	6.01484e-05	6.84938e-05	1.13875	1	1	0.424449	0.316102	1	1	0	1
P13987	CD59	20	20	20	18	17	0.000394609	0.000450374	1.14132	0.000263993	0.0002675	1.01328	1	1	0.444964	0.839225	0	1	0	0.487179
P63244	RACK1	20	20	20	20	19	0.000339661	0.000364561	1.07331	0.000296436	0.000345449	1.16534	1	1	0.444964	0.276627	0	1	0	1
P38606	ATP6V1A	20	20	20	20	19	8.91442e-05	9.97631e-05	1.11912	7.01955e-05	8.75656e-05	1.24745	1	1	0.461169	0.0180936	0	1	0	1
P60842	EIF4A1	20	20	20	20	19	0.000482283	0.000538069	1.11567	0.000391546	0.000480697	1.22769	1	1	0.461169	0.0154785	0	1	0	1
P62280	RPS11	20	19	17	17	17	0.000124403	0.000138415	1.11263	7.78456e-05	0.0001085	1.39379	1	1	0.461169	0.0479393	0	1	0	1
Q99613,B5ME19	EIF3C,EIF3CL	16	18	15	16	15	3.60236e-05	4.08503e-05	1.13399	2.64556e-05	3.18653e-05	1.20448	1	1	0.472753	0.215803	1	0.66142	1	1
Q08AI8	MAB21L4	18	19	18	19	19	0.000159226	0.000183151	1.15026	0.000143349	0.000186345	1.29994	1	1	0.473398	0.239236	1	1	1	1
Q15907,P62491	RAB11B,RAB11A	20	20	20	20	19	0.000352552	0.000378271	1.07295	0.000325606	0.000377151	1.1583	1	1	0.477691	0.210964	0	1	0	1
P43034,Q5IS43	PAFAH1B1	19	18	16	12	8	2.94023e-05	3.1562e-05	1.07345	1.74672e-05	1.56795e-05	0.897654	1	0	0.490253	0.773412	0	1	0	0.300845
Q9BS26	ERP44	18	19	17	19	16	5.17055e-05	6.56016e-05	1.26876	4.58411e-05	5.35582e-05	1.16834	1	1	0.490253	0.303768	1	1	1	0.60499
P04083	ANXA1	20	20	20	20	19	0.0220243	0.0248699	1.1292	0.0209998	0.0226509	1.07862	1	1	0.494523	0.429082	0	1	0	1
P10599	TXN	20	19	20	19	18	0.000361276	0.00045435	1.25762	0.000502531	0.00034744	0.691381	1	1	0.494523	0.0227187	0	1	0	1
P27824,O14967	CANX,CLGN	20	20	0	0	0	0.000255267	0.000283745	1.11156	NaN	NaN	NA	1	0	0.494523	NA	0	1	0	1
P61026	RAB10	20	20	20	20	19	0.000242968	0.000270174	1.11198	0.000302722	0.00035875	1.18508	1	1	0.494523	0.114254	0	1	0	1
Q14247	CTTN	20	20	17	17	14	9.91635e-05	0.000109996	1.10924	8.72742e-05	7.27624e-05	0.833721	1	1	0.494523	0.892238	0	1	0	1
Q9NYL9,P28289	TMOD3,TMOD1	18	19	19	16	16	5.45201e-05	6.52877e-05	1.1975	4.0206e-05	3.4597e-05	0.860493	1	1	0.507426	0.393727	1	1	0	0.341649
P26639,A2RTX5	TARS1,TARS3	19	18	0	0	0	3.68576e-05	4.17086e-05	1.13162	NaN	NaN	NA	1	0	0.524909	NA	0	1	0	1
P02511	CRYAB	15	17	17	16	18	0.000226131	0.000247575	1.09483	0.000207173	0.000165965	0.801096	1	1	0.532222	0.734596	1	0.694765	0	1
P17213	BPI	15	16	16	15	12	0.000342496	0.000499925	1.45965	0.000632908	0.000210725	0.332948	1	0	0.540484	0.124292	1	1	0	1
Q13283	G3BP1	15	16	10	8	8	1.93116e-05	2.19832e-05	1.13834	1.28722e-05	1.14974e-05	0.893195	1	0	0.540484	1	1	1	0	0.751186
P07476	IVL	20	20	20	20	19	0.00238243	0.00279839	1.1746	0.00254454	0.00325324	1.27852	1	1	0.546823	0.16534	0	1	0	1
Q9HCY8	S100A14	20	20	20	20	19	0.000787156	0.000860832	1.0936	0.000621908	0.000668963	1.07566	1	1	0.546823	0.758351	0	1	0	1
P07237	P4HB	20	20	20	20	19	0.00153642	0.00169458	1.10294	0.00119249	0.00136718	1.1465	1	1	0.564832	0.383413	0	1	0	1
P08238,Q58FF7	HSP90AB1,HSP90AB3P	20	20	20	20	19	0.0013719	0.00148159	1.07995	0.0011952	0.00143834	1.20343	1	1	0.564832	0.0595638	0	1	0	1
P16435	POR	15	17	17	17	17	4.04809e-05	4.51046e-05	1.11422	3.68001e-05	4.65111e-05	1.26389	1	1	0.568472	0.0578778	1	0.694765	0	1
P60866	RPS20	17	17	7	14	8	8.23116e-05	8.72752e-05	1.0603	1.83406e-05	6.57079e-05	3.58265	1	0	0.569365	0.00366871	0	1	1	0.0561609
Q5K651	SAMD9	16	18	16	16	15	6.22018e-05	6.87542e-05	1.10534	3.35146e-05	5.35829e-05	1.59879	1	1	0.578594	0.216586	1	0.66142	0	1
P54920,Q9H115	NAPA,NAPB	18	19	0	0	0	5.63545e-05	6.1096e-05	1.08414	NaN	NaN	NA	1	0	0.579147	NA	1	1	0	1
P05109	S100A8	20	20	20	20	19	0.032365	0.0353019	1.09074	0.029755	0.0315619	1.06073	1	1	0.583114	0.564832	0	1	0	1
P16401	H1-5	20	20	18	16	14	0.000289781	0.00033042	1.14024	0.000257027	0.00016083	0.62573	1	1	0.583114	0.119248	0	1	0	0.66142
P62269	RPS18	20	20	15	19	17	0.000120799	0.000125734	1.04085	6.55571e-05	0.000131365	2.00382	1	1	0.583114	0.00152403	0	1	1	0.181764
Q9HC84	MUC5B	19	18	18	19	17	0.00201062	0.00216779	1.07817	0.00200722	0.000900057	0.44841	1	1	0.597794	0.285214	0	1	1	1
Q9P2E9,Q8N4C6	RRBP1,NIN	20	18	0	0	0	6.97583e-05	7.86186e-05	1.12701	NaN	NaN	NA	1	0	0.597845	NA	0	0.487179	0	1
Q9H299	SH3BGRL3	16	18	8	6	6	0.000250175	0.000321195	1.28388	8.46489e-05	5.16921e-05	0.610665	1	0	0.616195	0.418077	1	0.66142	0	0.741054
P27797	CALR	20	19	20	20	18	0.000268701	0.000272891	1.01559	0.000191923	0.000208959	1.08877	1	1	0.620465	0.546823	0	1	0	1
P25685,Q9UDY4	DNAJB1,DNAJB4	19	20	0	0	0	6.00357e-05	6.62512e-05	1.10353	NaN	NaN	NA	1	0	0.639514	NA	1	1	0	1
P26373	RPL13	20	20	20	20	19	0.000137025	0.000141871	1.03537	9.73149e-05	0.00013215	1.35796	1	1	0.639514	0.0375192	0	1	0	1
P31943	HNRNPH1	20	19	19	20	18	0.000112884	0.000117189	1.03814	8.12717e-05	8.04474e-05	0.989857	1	1	0.639514	0.758351	0	1	1	1
P13693,Q56UQ5,Q9HAU6	TPT1,TPT1P8	20	19	20	20	16	0.000187545	0.00020438	1.08977	0.000120569	0.000127939	1.06112	1	1	0.658798	0.758351	0	1	0	1
Q9UQ80	PA2G4	20	20	20	20	19	0.000133072	0.000134739	1.01252	9.60558e-05	0.000109504	1.14001	1	1	0.658798	0.429082	0	1	0	1
Q9Y6R7	FCGBP	20	19	18	18	18	0.000599323	0.000815018	1.3599	0.00095387	0.000792256	0.83057	1	1	0.658798	0.860366	0	1	0	1
P39023,Q92901	RPL3,RPL3L	19	19	20	19	17	9.97624e-05	0.000112012	1.12279	9.54816e-05	0.000107205	1.12278	1	1	0.665144	0.231499	0	1	0	1
P51159	RAB27A	15	16	13	11	10	7.6479e-05	9.61788e-05	1.25758	8.75367e-05	7.51439e-05	0.858427	1	0	0.673276	0.576074	1	1	0	0.747527
Q9UQB8	BAIAP2	16	16	14	12	10	2.3699e-05	2.49808e-05	1.05409	1.76009e-05	1.55881e-05	0.885647	1	0	0.6738	0.750534	0	1	0	0.741054
P47897	QARS1	20	20	18	20	18	6.4942e-05	7.11243e-05	1.0952	4.76733e-05	5.16764e-05	1.08397	1	1	0.678306	0.336893	0	1	1	0.487179
P62241	RPS8	20	19	19	20	18	0.000147047	0.000150551	1.02383	0.00014715	0.000171188	1.16336	1	1	0.678306	0.477691	0	1	1	1
P60981	DSTN	20	18	19	19	16	0.000119383	0.000122816	1.02876	0.00010369	0.000126568	1.22064	1	1	0.694877	0.0935065	0	0.487179	0	1
P18510	IL1RN	17	18	18	19	18	0.000565053	0.000665374	1.17754	0.000428362	0.000342591	0.799771	1	1	0.714724	0.714929	1	1	1	1
P54108,P16562	CRISP3,CRISP2	18	19	18	16	17	0.000199514	0.00023424	1.17405	0.000190769	0.000139327	0.730344	1	1	0.714929	0.198096	1	1	0	0.66142
Q13045	FLII	20	20	20	20	18	7.60556e-05	7.73747e-05	1.01734	5.84687e-05	5.55494e-05	0.950072	1	1	0.71795	0.398302	0	1	0	1
Q15365	PCBP1	20	20	0	0	0	0.000423977	0.000437437	1.03175	NaN	NaN	NA	1	0	0.71795	NA	0	1	0	1
Q7L576	CYFIP1	20	20	20	20	19	0.000175659	0.0001878	1.06912	0.000132883	0.000148042	1.11408	1	1	0.71795	0.529097	0	1	0	1
Q92747	ARPC1A	20	20	18	18	16	0.000152165	0.000162207	1.06599	9.74975e-05	0.000106772	1.09513	1	1	0.71795	0.57904	0	1	0	1
Q96TA1	NIBAN2	20	20	20	20	19	0.000638275	0.00065526	1.02661	0.000480897	0.000585468	1.21745	1	1	0.71795	0.15716	0	1	0	1
Q9NQC3	RTN4	20	19	17	17	14	9.05002e-05	9.26852e-05	1.02414	7.89364e-05	7.5692e-05	0.958899	1	1	0.738062	0.870859	0	1	0	1
O60763	USO1	18	18	14	14	16	3.24008e-05	3.35142e-05	1.03436	2.13085e-05	2.60003e-05	1.22019	1	0	0.755632	0.387729	0	1	0	1
P18669,Q8N0Y7,P15259	PGAM1,PGAM4,PGAM2	20	20	0	0	0	0.000823229	0.000842231	1.02308	NaN	NaN	NA	1	0	0.758351	NA	0	1	0	1
P49913	CAMP	20	19	18	19	18	0.000691234	0.000863002	1.24849	0.000808889	0.000552345	0.682844	1	1	0.758351	0.19875	0	1	1	1
P56537	EIF6	19	20	11	14	10	5.21862e-05	6.23574e-05	1.1949	2.00613e-05	2.62058e-05	1.30629	1	0	0.758351	0.366435	1	1	1	0.514476
O60784	TOM1	17	17	17	18	19	3.52254e-05	3.6641e-05	1.04019	3.49413e-05	3.88775e-05	1.11265	1	1	0.765672	0.364391	0	1	1	1
O75131,Q96A23,O95741,Q86YQ8,Q9HCH3,Q9UBL6	CPNE3,CPNE4,CPNE6,CPNE8,CPNE5,CPNE7	20	20	0	0	0	0.000267328	0.000275855	1.0319	NaN	NaN	NA	1	0	0.778804	NA	0	1	0	1
P32119	PRDX2	20	20	20	20	19	0.000242235	0.000247634	1.02229	0.000226819	0.000274692	1.21106	1	1	0.778804	0.288767	0	1	0	1
P62937,Q9Y536,P0DN26,F5H284,A0A0B4J2A2,A0A075B767,A0A075B759,P0DN37	PPIA,PPIAL4A,PPIAL4F,PPIAL4D,PPIAL4C,PPIAL4H,PPIAL4E,PPIAL4G	20	20	20	20	19	0.00279758	0.00286664	1.02468	0.00218552	0.00203312	0.930269	1	1	0.778804	0.658798	0	1	0	1
P35606	COPB2	19	19	18	20	17	4.62078e-05	4.64207e-05	1.00461	4.68884e-05	5.28914e-05	1.12803	1	1	0.786765	0.490314	0	1	1	0.487179
Q02878	RPL6	18	18	19	17	14	5.79372e-05	6.06787e-05	1.04732	0.000225148	0.000170733	0.758315	1	1	0.797104	0.626166	0	1	0	0.60499
P27635,Q96L21	RPL10,RPL10L	18	19	19	19	17	8.67504e-05	9.03837e-05	1.04188	7.37992e-05	7.94402e-05	1.07644	1	1	0.79716	0.372021	1	1	0	1
P14780	MMP9	20	19	18	19	18	0.00096881	0.0010222	1.05511	0.00118653	0.000586299	0.49413	1	1	0.799407	0.189461	0	1	1	1
P22626	HNRNPA2B1	20	20	20	19	19	0.00031176	0.000353051	1.13245	0.000321562	0.000289042	0.898871	1	1	0.799407	0.968002	0	1	0	1
P53396	ACLY	19	20	19	17	17	6.87089e-05	7.29956e-05	1.06239	4.56101e-05	3.23674e-05	0.709655	1	1	0.799407	0.104426	1	1	0	0.60499
P31997	CEACAM8	15	16	15	14	12	8.58806e-05	0.000105331	1.22648	0.000155128	0.000120005	0.77359	1	0	0.817135	0.485798	1	1	0	1
P57735	RAB25	17	16	14	18	14	7.76457e-05	8.04268e-05	1.03582	5.97855e-05	0.000101198	1.69269	1	0	0.817678	0.0111104	0	1	1	0.235116
Q8NFW8	CMAS	17	16	11	15	18	2.46452e-05	2.51983e-05	1.02244	1.87819e-05	3.24145e-05	1.72584	1	0	0.817678	0.0971576	0	1	1	0.320266
P55884	EIF3B	16	19	12	17	16	2.95764e-05	3.00494e-05	1.01599	1.58102e-05	2.60512e-05	1.64775	1	0	0.817982	0.0297786	1	0.341649	1	0.155187
P15153	RAC2	20	18	0	0	0	0.000516384	0.000523924	1.0146	NaN	NaN	NA	1	0	0.818141	NA	0	0.487179	0	1
P05107	ITGB2	17	17	16	18	13	0.000300833	0.000304896	1.01351	0.000375722	0.000372544	0.991543	1	1	0.828398	0.578594	0	1	1	0.66142
P30050	RPL12	19	19	10	13	6	6.59045e-05	8.72003e-05	1.32313	2.14423e-05	3.48659e-05	1.62604	1	0	0.828667	0.200273	0	1	1	0.523107
Q70J99	UNC13D	15	16	13	10	7	1.95655e-05	2.39667e-05	1.22495	2.74871e-05	1.23062e-05	0.44771	1	0	0.838332	0.125001	1	1	0	0.523107
Q5JWF2,P63092,P38405	GNAS,GNAL	15	18	0	0	0	2.88306e-05	3.027e-05	1.04992	NaN	NaN	NA	1	0	0.838814	NA	1	0.407484	0	1
Q7KZF4	SND1	17	18	19	17	15	3.61758e-05	3.94209e-05	1.0897	3.41173e-05	3.65878e-05	1.07241	1	1	0.839083	0.569819	1	1	0	0.60499
P46777	RPL5	16	16	16	13	10	5.81525e-05	5.98324e-05	1.02889	4.11903e-05	3.4874e-05	0.846655	1	0	0.859884	0.83757	0	1	0	0.480115
P12814,P35609	ACTN1,ACTN2	20	19	18	18	14	0.000388505	0.000390639	1.00549	0.000414954	0.000263423	0.634824	1	1	0.861987	0.250075	0	1	0	1
P68371	TUBB4B	20	20	0	0	0	0.00193324	0.00193597	1.00141	NaN	NaN	NA	1	0	0.861987	NA	0	1	0	1
Q8WUM4	PDCD6IP	20	20	20	20	19	0.000503993	0.000518663	1.02911	0.000370761	0.000420877	1.13517	1	1	0.861987	0.429082	0	1	0	1
P51648	ALDH3A2	15	17	14	19	16	0.000195414	0.000207258	1.06061	3.02107e-05	4.79417e-05	1.58691	1	0	0.870563	0.0252526	1	0.694765	1	0.0914761
P41250	GARS1	18	17	15	10	13	2.29818e-05	2.32119e-05	1.01001	1.24382e-05	8.29609e-06	0.666985	1	0	0.881621	0.216217	0	1	0	0.190793
P11021	HSPA5	20	20	20	20	19	0.000524742	0.000538412	1.02605	0.000434678	0.000499702	1.14959	1	1	0.883057	0.0964996	0	1	0	1
P13489	RNH1	20	20	20	20	19	0.000663665	0.000669069	1.00814	0.000524099	0.000697886	1.33159	1	1	0.883057	0.00799538	0	1	0	1
P27348	YWHAQ	20	20	19	20	18	0.000192582	0.000212909	1.10555	0.000139478	0.000176432	1.26494	1	1	0.883057	0.0490903	0	1	1	1
Q96FQ6	S100A16	19	17	20	20	19	0.000387702	0.000404089	1.04227	0.000490796	0.00053249	1.08495	1	1	0.892364	0.477691	0	0.60499	0	1
Q9NP72	RAB18	17	16	14	14	9	2.87603e-05	2.90111e-05	1.00872	1.56647e-05	1.55377e-05	0.991891	1	0	0.902862	0.901797	0	1	0	1
P05091	ALDH2	19	16	15	11	7	3.89406e-05	3.99984e-05	1.02716	2.82689e-05	2.19303e-05	0.775774	1	0	0.903026	0.40688	0	0.341649	0	0.320266
P83731	RPL24	16	19	9	14	15	7.31311e-05	7.37044e-05	1.00784	2.31446e-05	3.8304e-05	1.65499	1	0	0.903026	0.111742	1	0.341649	1	0.200287
P09651,Q32P51	HNRNPA1,HNRNPA1L2	20	20	18	18	16	0.000149065	0.000192777	1.29324	0.000100998	0.000100952	0.999547	1	1	0.904208	0.597691	0	1	0	1
Q00610	CLTC	20	20	20	20	19	0.00117827	0.00119853	1.0172	0.00103841	0.00120066	1.15625	1	1	0.904208	0.0910861	0	1	0	1
Q7Z406	MYH14	20	20	20	20	19	0.000676564	0.000693889	1.02561	0.000497156	0.000606941	1.22083	1	1	0.904208	0.0263291	0	1	0	1
P68871	HBB	17	17	15	18	12	0.00480446	0.00754432	1.57027	0.00600594	0.00524039	0.872535	1	1	0.913696	0.559819	0	1	1	0.407484
P28676	GCA	15	16	15	13	11	0.00026798	0.000269185	1.0045	0.000287222	0.000189804	0.660826	1	0	0.924146	0.337199	1	1	0	0.731094
P05164	MPO	20	20	18	20	19	0.00821763	0.00983976	1.1974	0.0102085	0.010187	0.997895	1	1	0.925426	0.694877	0	1	1	0.487179
P30101	PDIA3	20	20	20	20	19	0.000470127	0.000558136	1.1872	0.000424603	0.000466922	1.09967	1	1	0.925426	0.210964	0	1	0	1
P59666	DEFA3	20	20	0	1	0	0.0177462	0.0213758	1.20453	NaN	6.9685e-07	NA	1	0	0.925426	NA	0	1	1	1
P68363,Q9H853	TUBA1B,TUBA4B	20	20	0	0	0	0.00166423	0.00170251	1.023	NaN	NaN	NA	1	0	0.925426	NA	0	1	0	1
O60716	CTNND1	19	20	20	19	19	0.000155187	0.00015748	1.01478	0.000125624	0.000125272	0.997197	1	1	0.946695	0.529097	1	1	0	1
P52209	PGD	20	20	20	20	19	0.0014491	0.00149894	1.03439	0.00103707	0.000998706	0.963012	1	1	0.946695	0.820148	0	1	0	1
P62879	GNB2	20	20	20	19	19	0.000301703	0.00030198	1.00092	0.000109212	0.000116262	1.06455	1	1	0.946695	0.639514	0	1	0	1
P68104,Q5VTE0,Q05639	EEF1A1,EEF1A1P5,EEF1A2	20	20	0	0	0	0.00449804	0.00452437	1.00585	NaN	NaN	NA	1	0	0.946695	NA	0	1	0	1
Q99536	VAT1	20	20	20	20	19	0.000201916	0.000202817	1.00446	0.00016455	0.000149222	0.906851	1	1	0.946695	0.398302	0	1	0	1
P39656	DDOST	17	19	17	16	13	4.63593e-05	4.92137e-05	1.06157	4.06193e-05	4.59163e-05	1.1304	1	1	0.956835	0.296405	1	0.60499	0	1
P62753	RPS6	16	16	10	16	14	5.56339e-05	5.82287e-05	1.04664	6.11599e-05	7.51931e-05	1.22945	1	0	0.967506	0.240004	0	1	1	0.0958456
P01871	IGHM	19	18	18	17	14	0.00059051	0.000715044	1.21089	0.000753296	0.000309315	0.410615	1	1	0.967629	0.0717784	0	1	0	1
P60660,P14649	MYL6,MYL6B	20	20	20	20	19	0.000862555	0.00087526	1.01473	0.000644506	0.000635581	0.986152	1	1	0.968002	0.639514	0	1	0	1
P07108	DBI	20	18	20	17	17	0.000205685	0.000210636	1.02407	0.000175715	0.000134539	0.765662	1	1	0.989208	0.250208	0	0.487179	0	0.230769
P31146	CORO1A	20	18	18	19	17	0.000842184	0.000953714	1.13243	0.00105032	0.000716405	0.682081	1	1	0.989208	0.350612	0	0.487179	1	1
Q71DI3,P84243,P68431,Q16695,Q6NXT2	H3C15,H3-3B,H3C8,H3-4,H3-5	20	20	20	20	19	0.00426258	0.00463608	1.08762	0.00413004	0.00426159	1.03185	1	1	1	0.841013	0	1	0	1
Q99102	MUC4	17	9	7	7	3	0.000117679	1.78181e-05	0.151412	3.55626e-05	1.98183e-05	0.557279	0	0	0.000189752	0.775033	0	0.0187011	0	1
O75874	IDH1	20	20	20	20	19	0.00037374	0.000214485	0.57389	0.000247077	0.00022293	0.902267	0	1	0.000257974	0.799407	0	1	0	1
Q96IU4	ABHD14B	18	9	9	9	3	7.42351e-05	2.09052e-05	0.281608	3.53397e-05	3.38279e-05	0.957221	0	0	0.000404936	1	0	0.00573567	0	1
Q9H8S9	MOB1A	12	1	6	9	2	6.09002e-06	6.87914e-07	0.112958	4.91859e-06	5.22748e-06	1.0628	0	0	0.000768521	0.564948	0	0.000431625	1	0.514476
Q03169	TNFAIP2	20	12	7	5	0	2.74885e-05	1.1812e-05	0.429709	1.61095e-05	1.79504e-05	1.11427	0	0	0.000878591	0.738631	0	0.003276	0	0.731094
Q10567	AP1B1	20	18	20	20	19	7.69447e-05	5.09524e-05	0.662194	5.89621e-05	5.5388e-05	0.939382	0	1	0.000920402	0.546823	0	0.487179	0	1
P14174	MIF	20	14	16	13	14	0.000410022	0.000252118	0.614888	0.000318154	0.000171349	0.538572	0	0	0.000994795	0.0574743	0	0.020196	0	0.480115
P01859	IGHG2	20	20	20	19	19	0.00413583	0.0016364	0.395665	0.00297687	0.00130935	0.43984	0	1	0.00104122	0.0046812	0	1	0	1
P22532,Q9BYE4	SPRR2D,SPRR2G	13	17	0	0	0	0.000141332	0.000609186	4.31033	NaN	NaN	NA	0	0	0.00117795	NA	1	0.273343	0	1
P22531	SPRR2E	1	11	0	0	0	2.12943e-05	0.00032678	15.3459	NaN	NaN	NA	0	0	0.00120979	NA	1	0.00124763	0	1
P11766	ADH5	16	6	5	4	1	3.77654e-05	1.10318e-05	0.292113	9.24367e-06	8.29335e-06	0.897192	0	0	0.00141462	0.753192	0	0.00364103	0	1
Q9ULA0	DNPEP	13	2	2	4	2	5.31947e-05	1.16103e-05	0.21826	1.20219e-05	2.28852e-05	1.90362	0	0	0.0014295	0.446117	0	0.000771628	1	0.66142
P30626	SRI	19	12	11	9	4	5.64238e-05	2.4546e-05	0.43503	1.87241e-05	2.37763e-05	1.26982	0	0	0.00152847	0.839606	0	0.019656	0	0.752371
O75608	LYPLA1	17	10	7	10	4	3.41946e-05	1.47384e-05	0.431017	9.69521e-06	1.01323e-05	1.04508	0	0	0.00162429	0.798374	0	0.0407424	1	0.523107
P31948	STIP1	19	14	12	13	6	5.74222e-05	2.3307e-05	0.405888	4.98496e-05	3.29787e-05	0.661564	0	0	0.0017331	0.707539	0	0.0914761	1	1
P01861	IGHG4	20	18	18	14	14	0.00135096	0.000511193	0.378392	0.000562286	0.000251973	0.448122	0	0	0.00178149	0.0139816	0	0.487179	0	0.235116
Q08188	TGM3	5	14	12	15	19	8.61759e-05	0.000598172	6.94129	0.000380153	0.000348805	0.917537	0	0	0.00184207	0.98902	1	0.0103867	1	0.500603
O43488,Q8NHP1,O95154	AKR7A2,AKR7L,AKR7A3	19	18	13	14	16	5.74165e-05	4.46427e-05	0.777523	2.78811e-05	3.18427e-05	1.14209	0	0	0.00233683	0.81502	0	1	1	1
Q9NR45	NANS	20	13	14	11	1	8.04496e-05	3.88126e-05	0.482447	3.93934e-05	5.32254e-05	1.35112	0	0	0.00249425	0.791777	0	0.00831601	0	0.514476
P05787	KRT8	18	9	14	12	6	0.00109037	0.000326477	0.299418	0.00054003	0.000851369	1.57652	0	0	0.00257923	0.609028	0	0.00573567	0	0.741054
Q12765	SCRN1	10	1	5	3	0	2.18946e-05	2.75618e-06	0.125884	1.00153e-05	5.294e-06	0.528593	0	0	0.0026294	0.510439	0	0.00334205	0	0.694765
P30536	TSPO	14	4	5	5	0	9.47377e-05	2.64179e-05	0.278853	2.92849e-05	3.41506e-05	1.16615	0	0	0.0026412	0.88686	0	0.00364103	0	1
Q9GZT8	NIF3L1	9	1	0	0	0	5.1714e-06	1.86213e-07	0.0360082	NaN	NaN	NA	0	0	0.00280939	NA	0	0.00836173	0	1
P14550	AKR1A1	20	20	19	19	19	0.000220285	0.00013372	0.607034	0.000133731	0.000148816	1.1128	0	1	0.00291451	0.144078	0	1	0	1
Q6UX06	OLFM4	20	19	17	17	11	0.00354747	0.000996152	0.280807	0.00177498	0.00197182	1.11089	0	1	0.00291451	0.432018	0	1	0	1
Q9UL46	PSME2	15	6	8	5	3	6.93684e-05	1.97296e-05	0.284417	5.20254e-05	2.78492e-05	0.5353	0	0	0.00305079	0.389081	0	0.0103867	0	0.500603
P15428	HPGD	20	15	16	14	9	0.000333185	0.000165446	0.496559	0.000196493	0.000349644	1.77942	0	0	0.00330666	0.652839	0	0.047124	0	0.716427
P21399	ACO1	19	9	11	9	10	4.58682e-05	1.57515e-05	0.343408	1.6865e-05	1.42559e-05	0.845299	0	0	0.0033464	0.750445	0	0.00124763	0	0.752371
P09467	FBP1	13	5	6	6	1	0.000103259	2.08639e-05	0.202053	3.69731e-05	3.87813e-05	1.04891	0	0	0.00406109	0.986689	0	0.0248417	0	1
Q7Z4W1	DCXR	19	15	17	16	9	3.51858e-05	1.88944e-05	0.536991	3.38745e-05	4.1234e-05	1.21726	0	1	0.00407847	0.694127	0	0.181764	0	1
P06396	GSN	20	20	20	20	19	0.00173306	0.001057	0.609907	0.00114164	0.000798034	0.699026	0	1	0.00426675	0.108077	0	1	0	1
P40121	CAPG	20	20	20	20	19	0.000468297	0.000324993	0.693988	0.000287811	0.00025891	0.899582	0	1	0.00426675	0.494523	0	1	0	1
Q14002	CEACAM7	19	16	15	15	9	0.000250308	0.000107958	0.4313	0.000178594	0.000197377	1.10517	0	0	0.00428387	0.934817	0	0.341649	0	1
P47989,Q06278	XDH,AOX1	10	2	5	3	0	1.02456e-05	1.09998e-06	0.107361	2.04286e-05	7.70108e-06	0.376975	0	0	0.00433296	0.438754	0	0.0138141	0	0.694765
P13716	ALAD	14	5	6	5	4	2.00815e-05	5.09311e-06	0.253622	1.10379e-05	1.01003e-05	0.915054	0	0	0.00435305	0.718126	0	0.0103867	0	1
P30044	PRDX5	20	20	20	20	19	0.000647652	0.000467756	0.722234	0.000430735	0.000348949	0.810124	0	1	0.0046812	0.221065	0	1	0	1
P08729	KRT7	16	10	9	7	3	0.00045191	0.000175943	0.389332	0.000174107	0.000308355	1.77106	0	0	0.00501414	0.646824	0	0.0958456	0	0.747527
P40925	MDH1	20	20	19	20	17	0.000288004	0.000198503	0.689239	0.000198452	0.000205149	1.03375	0	1	0.00513072	0.778804	0	1	1	1
Q02978	SLC25A11	19	12	9	9	3	2.9104e-05	1.55119e-05	0.532982	1.32175e-05	1.08664e-05	0.822125	0	0	0.00529735	0.835731	0	0.019656	0	1
Q9BYE3	LCE3D	2	10	5	9	15	1.84274e-06	1.96378e-05	10.6569	1.20767e-05	1.7218e-05	1.42571	0	0	0.00533443	0.280284	1	0.0138141	1	0.320266
P07339	CTSD	20	16	17	17	12	0.000433845	0.000180001	0.414898	0.000277166	0.000231955	0.836883	0	1	0.00553827	0.533169	0	0.106029	0	1
P46782	RPS5	19	18	17	18	17	3.79713e-05	2.4637e-05	0.648832	3.87443e-05	3.90728e-05	1.00848	0	1	0.00555158	0.714724	0	1	1	1
P09382	LGALS1	11	3	10	3	0	4.4576e-05	6.10136e-06	0.136875	1.93843e-05	5.43914e-06	0.280595	0	0	0.00573224	0.0184556	0	0.0187011	0	0.0407424
Q8N163	CCAR2	12	3	1	1	0	1.13645e-05	2.32358e-06	0.20446	3.23478e-06	3.00243e-06	0.92817	0	0	0.00648885	1	0	0.00791169	0	1
P08758	ANXA5	20	18	20	19	19	0.000162693	8.3161e-05	0.511153	0.000174109	0.000170937	0.981778	0	1	0.00655467	0.327262	0	0.487179	0	1
P01701	IGLV1-51	8	1	0	0	0	4.38342e-05	2.60761e-06	0.0594879	NaN	NaN	NA	0	0	0.00731982	NA	0	0.019656	0	1
Q9NZL9	MAT2B	8	1	3	2	0	4.88622e-05	4.87801e-06	0.0998319	1.16899e-05	1.19085e-05	1.0187	0	0	0.00731982	0.72405	0	0.019656	0	1
Q9Y3C8	UFC1	8	1	1	0	0	5.7402e-06	4.66305e-07	0.081235	3.84431e-07	NaN	NA	0	0	0.00731982	NA	0	0.019656	0	1
P14618,P30613	PKM,PKLR	20	20	20	20	19	0.00471903	0.00344236	0.729465	0.00287724	0.00279016	0.969738	0	1	0.00733082	0.639514	0	1	0	1
P00390	GSR	19	16	16	13	7	0.000226003	0.000107819	0.47707	0.000116169	0.000132997	1.14486	0	0	0.00765461	0.25665	0	0.341649	0	0.480115
P01772,P01767,A0A0C4DH42	IGHV3-33,IGHV3-53,IGHV3-66	13	5	0	0	0	0.000231345	7.49986e-05	0.324186	NaN	NaN	NA	0	0	0.00767552	NA	0	0.0248417	0	1
P30086	PEBP1	20	19	20	19	18	0.000249302	0.000171709	0.688759	0.000210702	0.000193989	0.920679	0	1	0.00799538	0.620465	0	1	0	1
P21397	MAOA	12	4	5	4	0	7.93983e-05	2.10123e-05	0.264644	5.24794e-05	5.95769e-05	1.13524	0	0	0.00823774	0.781441	0	0.0224774	0	1
O75363	BCAS1	11	3	3	2	0	1.12601e-05	3.12932e-06	0.277912	6.26726e-06	6.28258e-06	1.00244	0	0	0.0083965	0.689065	0	0.0187011	0	1
P00367,P49448	GLUD1,GLUD2	19	17	10	10	3	0.000118737	5.56622e-05	0.468784	8.33263e-05	6.64614e-05	0.797605	0	0	0.0086626	1	0	0.60499	0	1
P04259	KRT6B	11	17	12	17	19	0.000778838	0.00249053	3.19775	0.00168591	0.00364184	2.16016	0	0	0.00918903	0.0209053	1	0.0823588	1	0.155187
P06703	S100A6	17	11	12	13	7	0.00168974	0.000722687	0.427692	0.000839883	0.00141419	1.68379	0	0	0.00918903	0.834898	0	0.0823588	1	1
P07602	PSAP	14	7	9	0	1	7.82653e-05	2.83812e-05	0.362628	4.43627e-05	NaN	NA	0	0	0.00958469	NA	0	0.0561609	0	0.0012285
P02794	FTH1	13	6	10	5	2	0.000111636	1.74696e-05	0.156488	6.60159e-05	5.03093e-05	0.762078	0	0	0.00964868	0.196702	0	0.0561609	0	0.190793
P22059,Q969R2	OSBP,OSBP2	8	1	3	2	4	4.33966e-06	5.73311e-07	0.13211	9.21875e-07	4.88964e-07	0.530401	0	0	0.0101418	0.621115	0	0.019656	0	1
P10768	ESD	18	14	18	14	11	3.51052e-05	1.98855e-05	0.566456	2.84644e-05	1.92088e-05	0.674837	0	0	0.0102771	0.0798347	0	0.235116	0	0.235116
P09525	ANXA4	20	19	20	20	17	0.000274712	0.000166463	0.605955	0.000210384	0.000240604	1.14364	0	1	0.010314	0.946695	0	1	0	1
Q9NZ08	ERAP1	16	10	9	7	4	1.55589e-05	5.79125e-06	0.372215	1.3457e-05	6.49122e-06	0.482369	0	0	0.0105487	0.541262	0	0.0958456	0	0.747527
P05023,P13637,P50993,P54707	ATP1A1,ATP1A3,ATP1A2,ATP12A	10	2	0	0	0	0.00011735	5.18524e-05	0.441862	NaN	NaN	NA	0	0	0.0106939	NA	0	0.0138141	0	1
Q9UHD8	SEPTIN9	13	5	6	2	0	2.27827e-05	7.02391e-06	0.3083	1.33506e-05	7.49444e-06	0.561356	0	0	0.0108489	0.169324	0	0.0248417	0	0.235116
P09758	TACSTD2	17	9	12	16	4	7.98755e-05	3.57784e-05	0.447927	6.11777e-05	5.46447e-05	0.893212	0	0	0.0109754	0.773412	0	0.0187011	1	0.300845
Q13421	MSLN	8	1	2	1	0	0.000108837	1.72947e-05	0.158905	1.83663e-05	8.93373e-06	0.486419	0	0	0.011278	0.573704	0	0.019656	0	1
O43240	KLK10	12	17	16	16	19	0.000109193	0.000249191	2.28212	0.000112694	0.000199308	1.76858	0	1	0.0114597	0.0288037	1	0.155187	0	1
P07203,Q98234	GPX1	17	11	0	0	0	7.53845e-05	1.98453e-05	0.263255	NaN	NaN	NA	0	0	0.0116465	NA	0	0.0823588	0	1
Q9HC38	GLOD4	17	11	10	12	5	4.50754e-05	2.00274e-05	0.444308	2.37476e-05	2.38916e-05	1.00606	0	0	0.0116465	0.744229	0	0.0823588	1	0.751186
Q96KP4	CNDP2	19	19	20	17	18	0.000244858	0.000120974	0.494059	0.000136397	0.000135627	0.994356	0	1	0.0118771	0.424797	0	1	0	0.230769
P17931	LGALS3	20	20	20	19	18	0.000564068	0.000375836	0.666297	0.000305386	0.000336537	1.102	0	1	0.0121656	0.968002	0	1	0	1
Q86VP6	CAND1	19	18	20	19	17	0.000100211	5.17699e-05	0.516609	6.93412e-05	6.2358e-05	0.899292	0	1	0.0123284	0.444964	0	1	0	1
P00966	ASS1	14	9	6	4	0	0.000802705	0.000186604	0.232469	0.000557526	0.000556159	0.997548	0	0	0.012732	0.631091	0	0.200287	0	0.716427
P50995,P27216	ANXA11,ANXA13	20	20	20	20	18	0.000489519	0.000317679	0.648961	0.000350267	0.000327335	0.934529	0	1	0.0131944	0.276627	0	1	0	1
Q9UEW8	STK39	14	7	5	5	5	3.01563e-05	1.1817e-05	0.39186	8.7797e-06	8.00571e-06	0.911843	0	0	0.0132876	1	0	0.0561609	0	1
Q16851	UGP2	20	17	20	20	15	0.000149725	9.58722e-05	0.640322	0.000103445	9.89877e-05	0.956907	0	1	0.0133032	0.778804	0	0.230769	0	1
P09211	GSTP1	20	20	20	20	18	0.00263101	0.00216955	0.824607	0.00168506	0.00147782	0.877015	0	1	0.0142973	0.141705	0	1	0	1
Q14103	HNRNPD	20	16	17	15	10	0.000128685	8.12461e-05	0.631357	9.41452e-05	6.61987e-05	0.703155	0	0	0.0143181	0.384829	0	0.106029	0	0.694765
P11182	DBT	7	1	1	0	0	3.30121e-06	2.11392e-07	0.0640345	1.27547e-06	NaN	NA	0	0	0.0147263	NA	0	0.043596	0	1
Q9UI12	ATP6V1H	19	14	9	11	12	1.90092e-05	1.22858e-05	0.646309	6.5012e-06	9.55719e-06	1.47007	0	0	0.0152089	0.259471	0	0.0914761	1	0.752371
O75342	ALOX12B	2	9	6	15	15	6.8765e-06	3.60852e-05	5.2476	1.2799e-05	4.95572e-05	3.87196	0	0	0.0153667	0.00439841	1	0.0309503	1	0.0103867
P43155	CRAT	8	1	2	1	0	7.79228e-06	1.76057e-06	0.225938	5.72816e-06	4.57804e-06	0.799217	0	0	0.0153935	0.614695	0	0.019656	0	1
Q9BTT0	ANP32E	8	1	3	0	0	8.82924e-06	1.73593e-06	0.196612	2.98607e-06	NaN	NA	0	0	0.0153935	NA	0	0.019656	0	0.230769
P53007	SLC25A1	18	11	7	8	2	1.73892e-05	9.36104e-06	0.538325	9.66589e-06	7.98555e-06	0.826158	0	0	0.0155622	0.888669	0	0.0309503	1	1
Q6XQN6	NAPRT	20	16	19	19	18	6.65361e-05	5.1532e-05	0.774497	6.11089e-05	6.13673e-05	1.00423	0	1	0.0166178	0.766035	0	0.106029	0	1
P0DOX7		20	20	20	20	19	0.00674508	0.00418761	0.620839	0.00477836	0.00238592	0.499319	0	1	0.0167424	0.00561777	0	1	0	1
Q01813	PFKP	20	19	19	20	17	0.000118971	8.0945e-05	0.680375	8.1604e-05	9.43555e-05	1.15626	0	1	0.0167424	0.546823	0	1	1	1
Q13126	MTAP	9	2	3	9	0	1.33263e-05	3.12367e-06	0.234399	9.28369e-06	1.15547e-05	1.24462	0	0	0.0168832	0.102056	0	0.0309503	1	0.0823588
Q13510	ASAH1	18	12	14	13	11	3.12767e-05	2.00665e-05	0.641579	2.28352e-05	2.10448e-05	0.921594	0	0	0.0170598	0.610615	0	0.0648332	0	1
Q8WVV4	POF1B	12	18	18	17	19	0.000136112	0.000436737	3.20867	0.000194656	0.000294588	1.51338	0	1	0.0170598	0.228257	1	0.0648332	0	1
Q9UGI8	TES	15	7	5	4	1	2.51677e-05	7.65579e-06	0.304191	7.41628e-06	5.80721e-06	0.783035	0	0	0.0171675	0.670538	0	0.0248417	0	1
Q9C002	NMES1	11	3	6	2	1	1.14409e-05	5.92671e-06	0.518027	7.37791e-06	2.13933e-06	0.289964	0	0	0.0172352	0.108127	0	0.0187011	0	0.235116
Q9BRX8	PRXL2A	15	9	12	10	10	9.75858e-06	4.74076e-06	0.485804	1.67892e-05	8.44946e-06	0.503266	0	0	0.0174873	0.287381	0	0.10534	0	0.751186
Q9BR76,A9Z1Z3	CORO1B,FER1L4	20	18	13	15	11	7.41134e-05	5.38825e-05	0.727028	2.89959e-05	4.12461e-05	1.42248	0	0	0.0179332	0.118061	0	0.487179	1	0.731094
Q13617	CUL2	10	4	1	1	1	3.65277e-06	1.19238e-06	0.326431	5.03787e-07	3.33264e-07	0.661518	0	0	0.0179924	1	0	0.0958456	0	1
O95994,Q8TD06	AGR2,AGR3	7	1	4	3	0	2.2562e-05	1.9867e-06	0.0880552	1.84046e-05	1.90757e-05	1.03646	0	0	0.0181957	0.728472	0	0.043596	0	1
P09429,B2RPK0	HMGB1,HMGB1P1	15	7	0	0	0	0.000107132	4.43322e-05	0.413808	NaN	NaN	NA	0	0	0.0185362	NA	0	0.0248417	0	1
O75828	CBR3	11	17	10	13	15	3.06405e-05	6.03594e-05	1.96993	3.34401e-05	5.04267e-05	1.50797	0	0	0.0197673	0.242734	1	0.0823588	1	0.523107
Q8NFJ5	GPRC5A	8	2	9	3	0	2.47029e-05	3.83718e-06	0.155333	2.99666e-05	1.44342e-05	0.481675	0	0	0.0198158	0.0616881	0	0.0648332	0	0.0823588
Q3LXA3	TKFC	13	6	5	3	0	2.3936e-05	6.91084e-06	0.288722	8.03079e-06	8.24233e-06	1.02634	0	0	0.0200737	0.485885	0	0.0561609	0	0.694765
Q9UHB6	LIMA1	7	1	1	2	0	1.28709e-05	1.59232e-06	0.123715	9.75848e-06	5.80454e-06	0.59482	0	0	0.0201847	0.614695	0	0.043596	1	1
P29218,O55023	IMPA1,Impa1	15	8	10	5	3	2.01902e-05	8.51798e-06	0.421887	1.20573e-05	8.80284e-06	0.730082	0	0	0.0202176	0.207707	0	0.053551	0	0.190793
P11279	LAMP1	20	15	10	10	6	5.82488e-05	3.53799e-05	0.607393	2.94387e-05	2.91612e-05	0.990573	0	0	0.0206154	0.805862	0	0.047124	0	1
P60953,P17081,Q9H4E5	CDC42,RHOQ,RHOJ	20	16	0	0	0	0.000174908	0.000119035	0.680556	NaN	NaN	NA	0	0	0.020675	NA	0	0.106029	0	1
P47895,O94788	ALDH1A3,ALDH1A2	14	8	0	0	0	2.05184e-05	9.22457e-06	0.449575	NaN	NaN	NA	0	0	0.0207681	NA	0	0.11097	0	1
Q14764	MVP	20	20	19	20	19	0.000306355	0.000196292	0.640735	0.000183094	0.000232317	1.26884	0	1	0.0210768	0.264832	0	1	1	1
Q9Y3Z3	SAMHD1	14	10	9	8	3	8.3719e-05	2.92816e-05	0.349761	6.71833e-05	4.43081e-05	0.659511	0	0	0.0210879	0.578221	0	0.333213	0	1
P49419	ALDH7A1	14	7	4	9	1	6.14722e-05	2.52808e-05	0.411256	5.72998e-05	5.51722e-05	0.962869	0	0	0.0212101	0.177399	0	0.0561609	1	0.175996
P07814	EPRS1	19	15	14	10	7	5.04424e-05	2.85773e-05	0.566534	2.41997e-05	2.16339e-05	0.893977	0	0	0.0212765	0.726747	0	0.181764	0	0.333213
P02748	C9	9	3	8	2	2	5.59292e-05	8.98317e-06	0.160617	3.48881e-05	8.24545e-06	0.23634	0	0	0.0213184	0.0343108	0	0.0823588	0	0.0648332
Q9H223	EHD4	15	10	9	8	8	1.17177e-05	6.35186e-06	0.542076	9.30705e-06	6.77322e-06	0.727751	0	0	0.0218673	0.578221	0	0.190793	0	1
A1L0T0	ILVBL	19	18	12	10	7	1.91264e-05	1.28943e-05	0.674163	1.27026e-05	9.68034e-06	0.762076	0	0	0.0222448	0.619556	0	1	0	0.751186
P07858	CTSB	20	18	15	15	12	0.000353781	0.000229434	0.64852	0.000163873	0.000141873	0.865747	0	0	0.0222636	0.566983	0	0.487179	0	1
P07358	C8B	7	1	2	1	0	1.48753e-05	1.88144e-06	0.12648	3.82927e-06	1.77253e-06	0.462888	0	0	0.0223608	0.573704	0	0.043596	0	1
Q9BRG1	VPS25	7	1	2	1	0	1.9109e-06	2.81994e-07	0.147571	5.16474e-07	3.50126e-07	0.677915	0	0	0.0223608	0.614695	0	0.043596	0	1
P06312	IGKV4-1	16	11	13	7	4	0.000178349	7.65378e-05	0.429145	9.23983e-05	3.35098e-05	0.362667	0	0	0.0231629	0.02236	0	0.175996	0	0.112834
Q14651	PLS1	10	4	1	0	0	8.16224e-06	2.12774e-06	0.260681	1.22191e-06	NaN	NA	0	0	0.0231767	NA	0	0.0958456	0	1
Q16531	DDB1	15	7	12	9	3	3.14231e-05	1.22926e-05	0.391195	1.66411e-05	2.3978e-05	1.44088	0	0	0.0232307	0.616429	0	0.0248417	0	0.527254
P12956	XRCC6	20	17	17	16	11	7.36578e-05	4.17886e-05	0.567334	6.53962e-05	4.56292e-05	0.697736	0	1	0.0238768	0.489191	0	0.230769	0	1
Q9Y2Q3	GSTK1	19	18	17	13	9	5.08709e-05	3.66803e-05	0.721048	3.38363e-05	2.8443e-05	0.840607	0	0	0.0238768	0.623629	0	1	0	0.273343
Q6IBS0	TWF2	11	4	11	6	3	7.20875e-06	2.47752e-06	0.343682	1.17412e-05	5.99172e-06	0.510318	0	0	0.0241101	0.129093	0	0.0483721	0	0.200287
P61158,Q9P1U1,Q9C0K3	ACTR3,ACTR3B,ACTR3C	20	20	20	19	19	0.000541733	0.000416745	0.769282	0.000349107	0.00027061	0.775149	0	1	0.0244677	0.413526	0	1	0	1
P30711,P0CG30,P0CG29	GSTT1,GSTT2B,GSTT2	7	1	0	0	0	1.57588e-05	2.99248e-06	0.189893	NaN	NaN	NA	0	0	0.0247382	NA	0	0.043596	0	1
Q14108	SCARB2	7	1	2	2	0	1.51909e-05	2.95467e-06	0.194503	5.42176e-06	3.93433e-06	0.725654	0	0	0.0247382	1	0	0.043596	0	1
Q8N335	GPD1L	7	1	0	4	0	1.86858e-05	3.14413e-06	0.168263	NaN	7.35446e-06	NA	0	0	0.0247382	NA	0	0.043596	1	0.106029
P06454	PTMA	17	14	9	9	3	5.17927e-05	1.87729e-05	0.362463	5.77563e-05	5.94114e-05	1.02866	0	0	0.0248131	0.976368	0	0.450576	0	1
P47755	CAPZA2	14	9	7	5	6	2.34525e-05	1.17697e-05	0.501854	1.34419e-05	7.92944e-06	0.589903	0	0	0.0252316	0.38565	0	0.200287	0	0.731094
O00151	PDLIM1	19	18	12	13	8	0.000142147	7.78908e-05	0.54796	0.000112447	6.34412e-05	0.564188	0	0	0.0256116	0.988914	0	1	1	1
Q12797	ASPH	11	4	2	2	0	4.29746e-06	1.36072e-06	0.316634	3.49528e-06	1.72027e-06	0.492168	0	0	0.0261309	0.979277	0	0.0483721	0	1
O95373	IPO7	14	7	10	6	7	5.82267e-06	3.31402e-06	0.569159	3.86964e-06	2.53742e-06	0.655724	0	0	0.0265308	0.278206	0	0.0561609	0	0.333213
O94832	MYO1D	19	14	11	13	11	2.88117e-05	1.53919e-05	0.534222	2.12683e-05	2.33379e-05	1.09731	0	0	0.0270777	0.695509	0	0.0914761	1	0.747527
Q53EL6	PDCD4	7	1	2	2	0	2.82481e-05	5.86969e-06	0.207791	1.89702e-05	1.78203e-05	0.939384	0	0	0.0273314	1	0	0.043596	0	1
P31939	ATIC	20	18	15	14	13	4.96699e-05	3.14748e-05	0.63368	2.53003e-05	2.59404e-05	1.0253	0	0	0.0274762	0.94552	0	0.487179	0	1
P68036,A0A1B0GUS4	UBE2L3,UBE2L5	9	3	1	0	0	1.42976e-05	3.70445e-06	0.259096	7.97179e-07	NaN	NA	0	0	0.0276514	NA	0	0.0823588	0	1
P68402	PAFAH1B2	11	5	3	1	3	1.22724e-05	4.81987e-06	0.392742	5.93097e-06	1.64338e-06	0.277084	0	0	0.0278594	0.29879	0	0.10534	0	0.60499
Q96RM1	SPRR2F	5	11	6	6	13	1.50556e-05	5.37268e-05	3.56856	4.54527e-05	0.000127943	2.81486	0	0	0.0278594	0.802394	1	0.10534	0	1
Q92876	KLK6	10	16	13	13	15	3.48895e-05	9.34419e-05	2.67822	2.76928e-05	9.63349e-05	3.4787	0	0	0.0279562	0.193811	1	0.0958456	0	1
Q9NZM1	MYOF	10	3	4	1	0	3.6073e-05	1.30004e-05	0.360392	1.92425e-05	4.45593e-06	0.231567	0	0	0.0282468	0.179728	0	0.0407424	0	0.341649
Q6NUK1	SLC25A24	8	2	4	6	0	1.62076e-05	3.27655e-06	0.202161	1.58201e-05	1.73532e-05	1.09691	0	0	0.0287032	0.487927	0	0.0648332	1	0.716427
O75347	TBCA	12	4	8	3	2	2.75682e-05	9.57178e-06	0.347203	1.65779e-05	5.29744e-06	0.319549	0	0	0.0289631	0.0609886	0	0.0224774	0	0.155187
P31040	SDHA	12	5	4	6	1	2.92976e-05	1.05774e-05	0.361033	1.32725e-05	2.25392e-05	1.69818	0	0	0.0293422	0.487927	0	0.053551	1	0.716427
Q14376	GALE	20	16	17	9	13	5.73765e-05	3.91371e-05	0.682111	3.45751e-05	2.3862e-05	0.690152	0	0	0.0293648	0.11506	0	0.106029	0	0.0187011
Q9Y5Z4	HEBP2	20	18	19	18	18	0.000102369	7.50127e-05	0.73277	8.4061e-05	8.2601e-05	0.982632	0	1	0.0294333	0.860405	0	0.487179	0	1
Q9UBQ7	GRHPR	14	8	5	3	2	2.06201e-05	9.06174e-06	0.439461	7.9444e-06	5.36086e-06	0.674797	0	0	0.0299824	0.438754	0	0.11097	0	0.694765
P05387	RPLP2	18	12	15	10	14	6.04204e-05	3.78447e-05	0.626356	4.60138e-05	3.49374e-05	0.75928	0	0	0.0302104	0.337684	0	0.0648332	0	0.190793
P0DOX5,P01857	IGHG1	20	20	20	20	19	0.0283707	0.0165482	0.583284	0.0184505	0.00996941	0.540331	0	1	0.0304113	0.0244677	0	1	0	1
P31949	S100A11	20	20	20	19	19	0.00211638	0.00159371	0.753036	0.00159383	0.00135785	0.851941	0	1	0.0304113	0.276627	0	1	0	1
P02765	AHSG	19	13	15	13	8	0.000558658	0.000204314	0.365723	0.000304718	0.000129473	0.424894	0	0	0.0319188	0.048351	0	0.043596	0	0.731094
P17655	CAPN2	20	20	20	20	18	0.000232654	0.000177271	0.761949	0.000141048	0.000154688	1.09671	0	1	0.0326434	0.182631	0	1	0	1
P62851	RPS25	9	3	5	5	0	2.80692e-05	6.80911e-06	0.242583	1.7675e-05	2.09366e-05	1.18453	0	0	0.0327231	0.91502	0	0.0823588	0	1
Q13867	BLMH	13	8	9	8	4	1.31114e-05	6.24543e-06	0.476336	1.27434e-05	8.28725e-06	0.650317	0	0	0.0329674	0.425794	0	0.204927	0	1
Q9H2U2	PPA2	14	7	4	2	1	2.14514e-05	7.99986e-06	0.372929	9.98445e-06	9.01673e-06	0.903077	0	0	0.0329674	0.446117	0	0.0561609	0	0.66142
Q9Y376	CAB39	17	13	15	10	3	3.04351e-05	1.81572e-05	0.596587	1.89163e-05	1.22645e-05	0.648356	0	0	0.0334676	0.160501	0	0.273343	0	0.190793
P25788	PSMA3	16	12	12	12	9	5.50187e-05	3.29853e-05	0.599529	2.82469e-05	3.23796e-05	1.1463	0	0	0.0335797	0.664779	0	0.300845	0	1
P62333	PSMC6	20	18	18	18	16	3.19796e-05	2.35228e-05	0.735555	2.53908e-05	2.52066e-05	0.992743	0	1	0.0337093	0.714852	0	0.487179	0	1
O00534	VWA5A	8	2	4	3	0	1.29655e-05	4.45996e-06	0.343987	9.59213e-06	8.76747e-06	0.914028	0	0	0.0343108	0.759363	0	0.0648332	0	1
P53634	CTSC	2	8	1	1	0	4.98652e-06	2.15723e-05	4.32613	1.59458e-06	2.19963e-06	1.37944	0	0	0.0343108	1	1	0.0648332	0	1
P15941	MUC1	17	14	10	6	5	6.16637e-05	3.1022e-05	0.503085	4.58648e-05	2.93755e-05	0.64048	0	0	0.0350066	0.22761	0	0.450576	0	0.333213
Q9Y6W5	WASF2	6	1	1	1	0	5.53863e-06	7.19442e-07	0.129895	1.7957e-06	6.11037e-07	0.340278	0	0	0.0354328	1	0	0.0914761	0	1
P63000,P60763	RAC1,RAC3	20	15	14	10	5	9.77664e-05	6.48742e-05	0.663563	5.85125e-05	4.20935e-05	0.719393	0	0	0.0358741	0.234775	0	0.047124	0	0.333213
P39687,O43423,O95626	ANP32A,ANP32C,ANP32D	10	3	9	3	2	1.66854e-05	6.51349e-06	0.390372	1.89376e-05	5.70653e-06	0.301334	0	0	0.0360523	0.0489955	0	0.0407424	0	0.0823588
P25789	PSMA4	19	13	15	12	8	4.16036e-05	2.61022e-05	0.627403	2.8084e-05	2.29246e-05	0.816286	0	0	0.036518	0.572588	0	0.043596	0	0.500603
P26447	S100A4	16	10	13	6	1	0.00017485	8.9854e-05	0.513893	0.000116276	6.6469e-05	0.571648	0	0	0.0368598	0.0818466	0	0.0958456	0	0.0561609
Q15181	PPA1	20	19	18	17	13	0.000122452	8.22735e-05	0.671883	7.35747e-05	7.45269e-05	1.01294	0	1	0.0375192	1	0	1	0	1
P16930	FAH	11	5	7	3	1	7.4031e-06	2.93359e-06	0.396266	5.06176e-06	3.00574e-06	0.593814	0	0	0.0377942	0.200366	0	0.10534	0	0.273343
P01780,P01763,P01762,A0A0B4J1V1,A0A0C4DH32	IGHV3-7,IGHV3-48,IGHV3-11,IGHV3-21,IGHV3-20	19	16	0	0	0	0.000275067	0.000145811	0.530091	NaN	NaN	NA	0	0	0.038333	NA	0	0.341649	0	1
P07919,A0A096LP55	UQCRH,UQCRHL	6	1	0	5	0	9.39516e-06	9.43146e-07	0.100386	NaN	1.40177e-05	NA	0	0	0.0391568	NA	0	0.0914761	1	0.047124
P48668	KRT6C	2	7	15	14	19	7.56176e-06	7.90649e-05	10.4559	0.00078753	0.00138347	1.75672	0	0	0.0400662	0.359837	1	0.127386	0	1
Q96BQ1	FAM3D	7	2	0	1	0	7.50189e-06	1.19767e-06	0.159649	NaN	8.72386e-07	NA	0	0	0.0400662	NA	0	0.127386	1	1
P35237	SERPINB6	20	20	19	16	18	7.54493e-05	5.93665e-05	0.78684	4.96899e-05	4.162e-05	0.837595	0	1	0.0401751	0.228257	0	1	0	0.341649
P61160	ACTR2	20	19	20	20	19	0.000447304	0.000369075	0.82511	0.000302161	0.000264521	0.875432	0	1	0.0401751	0.201194	0	1	0	1
Q16401,Q5IFJ8	PSMD5	19	18	15	15	14	4.02216e-05	2.94043e-05	0.731059	2.77475e-05	3.02177e-05	1.08902	0	0	0.0410856	0.978251	0	1	0	1
Q9UGL9	CRCT1	8	15	10	13	14	0.000244032	0.000671864	2.75318	0.000137925	0.000348578	2.5273	0	0	0.0412711	0.132076	1	0.053551	1	0.523107
Q86XP0	PLA2G4D	6	14	11	14	18	3.29798e-05	7.56927e-05	2.29512	6.83838e-05	7.66878e-05	1.12143	0	0	0.041507	0.461468	1	0.0256448	1	0.514476
P02649	APOE	9	3	7	2	3	4.67606e-05	9.75742e-06	0.208668	1.90421e-05	6.78994e-06	0.356575	0	0	0.0418143	0.0854077	0	0.0823588	0	0.127386
P35573	AGL	12	7	10	6	3	2.87498e-05	1.52426e-05	0.53018	1.46851e-05	2.14152e-05	1.45829	0	0	0.0421011	0.367543	0	0.204927	0	0.333213
O00299	CLIC1	20	20	20	20	19	0.000422057	0.000344814	0.816986	0.000416888	0.000398024	0.954751	0	1	0.0429846	0.511661	0	1	0	1
P09972	ALDOC	19	20	20	19	18	0.000102675	8.78128e-05	0.855249	0.00010769	0.000106927	0.992913	0	1	0.0429846	0.904208	1	1	0	1
P60174	TPI1	20	20	20	20	19	0.00294004	0.00241645	0.821912	0.00235609	0.00264192	1.12132	0	1	0.0429846	0.444964	0	1	0	1
P68133,P68032,P63267,P62736	ACTA1,ACTC1,ACTG2,ACTA2	20	19	0	0	0	0.00213582	0.00146708	0.686893	NaN	NaN	NA	0	0	0.0429846	NA	0	1	0	1
P50502,Q8IZP2	ST13,ST13P4	6	1	0	0	0	1.92969e-05	2.90456e-06	0.150519	NaN	NaN	NA	0	0	0.0432081	NA	0	0.0914761	0	1
P35858	IGFALS	7	2	3	3	1	6.01114e-06	9.48653e-07	0.157816	2.74464e-06	2.26083e-06	0.823727	0	0	0.0437923	1	0	0.127386	0	1
O95782	AP2A1	20	18	13	17	12	3.09073e-05	2.39898e-05	0.776184	1.83933e-05	2.17679e-05	1.18347	0	0	0.0438705	0.913165	0	0.487179	1	0.273343
P19827	ITIH1	10	5	8	4	2	4.42792e-05	1.14952e-05	0.259607	2.56844e-05	1.78053e-05	0.693232	0	0	0.0448028	0.308829	0	0.190793	0	0.300845
Q06323	PSME1	19	15	16	16	10	0.000137521	6.36797e-05	0.463054	8.16289e-05	9.1373e-05	1.11937	0	1	0.044963	0.775528	0	0.181764	0	1
P06730,A6NMX2	EIF4E,EIF4E1B	16	10	7	6	6	1.57551e-05	9.58693e-06	0.608498	5.5718e-06	4.40271e-06	0.790177	0	0	0.04503	0.757502	0	0.0958456	0	1
Q02413	DSG1	10	16	16	16	18	0.000223393	0.000457535	2.04811	0.000348161	0.000578307	1.66103	0	1	0.04503	0.237467	1	0.0958456	0	1
P19338	NCL	12	6	9	5	4	5.27656e-05	1.96114e-05	0.371671	2.44746e-05	1.79226e-05	0.732294	0	0	0.0455527	0.26638	0	0.11097	0	0.320266
P21281	ATP6V1B2	20	20	18	18	17	5.23559e-05	4.37808e-05	0.836216	3.31168e-05	3.1153e-05	0.940702	0	1	0.0459542	0.67487	0	1	0	1
P61586,P08134	RHOA,RHOC	20	20	0	0	0	0.000342715	0.000280985	0.819879	NaN	NaN	NA	0	0	0.0459542	NA	0	1	0	1
Q13618	CUL3	18	15	17	16	15	1.87184e-05	1.23649e-05	0.660575	2.1157e-05	2.16176e-05	1.02177	0	1	0.046215	0.860067	0	0.407484	0	1
O60664	PLIN3	19	18	19	19	18	0.000140678	9.77278e-05	0.69469	0.000136924	0.000139036	1.01543	0	1	0.0467504	0.481847	0	1	0	1
Q9NRD8	DUOX2	19	15	11	12	7	9.35084e-05	4.90415e-05	0.524461	5.74529e-05	3.54821e-05	0.617585	0	0	0.0479393	0.8109	0	0.181764	1	1
O94905	ERLIN2	16	10	1	3	0	2.7447e-05	1.62634e-05	0.592538	2.14464e-06	4.47297e-06	2.08565	0	0	0.0480724	0.323604	0	0.0958456	1	0.60499
A0A0B4J1V0	IGHV3-15	8	3	8	8	3	0.000106879	1.8649e-05	0.174488	5.02849e-05	4.5169e-05	0.898261	0	0	0.0480743	0.963455	0	0.155187	0	1
P01700,P01699	IGLV1-47,IGLV1-44	10	5	7	2	0	0.000112027	3.19599e-05	0.285287	4.46612e-05	7.66512e-06	0.171628	0	0	0.0482236	0.0567675	0	0.190793	0	0.127386
Q9UKK3	PARP4	8	2	1	2	1	4.4033e-06	1.23823e-06	0.281204	1.42755e-06	2.02536e-06	1.41877	0	0	0.048368	0.614695	0	0.0648332	1	1
Q9NY33	DPP3	12	7	8	3	6	1.72086e-05	8.31148e-06	0.482984	1.52908e-05	4.84463e-06	0.316833	0	0	0.0483784	0.109919	0	0.204927	0	0.155187
Q9UKR3	KLK13	14	17	17	16	17	0.000182868	0.000380859	2.0827	0.000246922	0.000364882	1.47772	0	1	0.0485795	0.335643	1	0.450576	0	1
P17096	HMGA1	12	6	2	4	0	2.33909e-05	8.89557e-06	0.380301	4.72568e-06	7.94561e-06	1.68137	0	0	0.0488507	0.395893	0	0.11097	1	0.66142
P10316,P01891,P16190	HLA-A	12	5	0	0	0	2.20594e-05	1.10973e-05	0.503065	NaN	NaN	NA	0	0	0.0490122	NA	0	0.053551	0	1
P07384	CAPN1	20	20	20	20	19	0.000831131	0.000662019	0.796528	0.000578915	0.000639912	1.10536	0	1	0.0490903	0.340785	0	1	0	1
P48047	ATP5PO	20	15	16	16	9	8.36184e-05	5.29019e-05	0.632658	7.71873e-05	6.23013e-05	0.807144	0	1	0.0496492	0.734259	0	0.047124	0	1
Q8TE77	SSH3	14	11	8	8	3	5.52243e-05	2.45965e-05	0.445393	1.03622e-05	1.10622e-05	1.06756	0	0	0.050091	0.795145	0	0.514476	0	1
P10253	GAA	11	5	9	6	3	7.55389e-06	3.28149e-06	0.434411	9.5592e-06	6.57749e-06	0.688079	0	0	0.0505951	0.327126	0	0.10534	0	0.514476
P05543	SERPINA7	10	5	5	1	0	1.74646e-05	4.89978e-06	0.280555	5.38624e-06	1.8259e-06	0.338994	0	0	0.0518612	0.107205	0	0.190793	0	0.181764
P21980,P49221	TGM2,TGM4	8	3	0	0	0	1.94868e-05	3.57923e-06	0.183674	NaN	NaN	NA	0	0	0.0520968	NA	0	0.155187	0	1
O75531	BANF1	6	1	1	0	0	8.99774e-06	2.10146e-06	0.233555	3.32704e-06	NaN	NA	0	0	0.0523786	NA	0	0.0914761	0	1
O76070	SNCG	6	1	2	2	0	1.3622e-05	2.79179e-06	0.204946	2.78896e-06	4.58506e-06	1.64401	0	0	0.0523786	0.937886	0	0.0914761	0	1
P01599	IGKV1-17	6	1	1	1	0	1.7388e-05	3.63373e-06	0.208979	1.96138e-06	3.32926e-06	1.69741	0	0	0.0523786	1	0	0.0914761	0	1
P08294	SOD3	6	1	1	1	0	2.17002e-05	6.73073e-06	0.31017	1.48842e-06	8.32834e-06	5.59542	0	0	0.0523786	1	0	0.0914761	0	1
P46926	GNPDA1	6	1	0	0	0	1.84185e-05	4.50178e-06	0.244416	NaN	NaN	NA	0	0	0.0523786	NA	0	0.0914761	0	1
Q14126	DSG2	6	1	4	3	0	1.78765e-05	5.94878e-06	0.332771	3.02251e-05	7.75361e-06	0.256529	0	0	0.0523786	0.759363	0	0.0914761	0	1
P00558	PGK1	20	20	20	20	19	0.0021776	0.00183698	0.843582	0.00174153	0.00166806	0.957817	0	1	0.0523995	0.678306	0	1	0	1
P47756	CAPZB	20	19	20	20	19	0.000283874	0.000223497	0.787311	0.000225187	0.000189276	0.840528	0	1	0.0523995	0.182631	0	1	0	1
Q96C19,Q9BUP0	EFHD2,EFHD1	20	17	16	15	11	0.000115955	7.9309e-05	0.683966	9.58733e-05	7.08693e-05	0.739198	0	0	0.0530585	0.282579	0	0.230769	0	1
P40939	HADHA	20	18	20	19	19	0.000186988	0.000128403	0.686693	0.000151902	0.000141018	0.928344	0	1	0.053092	1	0	0.487179	0	1
P21926	CD9	15	9	13	8	1	5.95171e-05	2.85118e-05	0.479053	5.29736e-05	3.98157e-05	0.751614	0	0	0.0537315	0.309559	0	0.10534	0	0.204927
P30046,A6NHG4	DDT,DDTL	19	17	10	8	5	6.42542e-05	4.50392e-05	0.700954	2.49702e-05	1.46053e-05	0.584907	0	0	0.054674	0.292985	0	0.60499	0	0.751186
Q13057	COASY	17	14	16	9	11	7.46466e-06	4.79662e-06	0.642577	9.41172e-06	4.02803e-06	0.42798	0	0	0.0551292	0.0128755	0	0.450576	0	0.0483721
Q15121	PEA15	18	15	11	6	7	3.57665e-05	2.53727e-05	0.709399	1.41613e-05	9.80475e-06	0.692361	0	0	0.0558685	0.247252	0	0.407484	0	0.200287
O60547	GMDS	8	3	2	1	0	1.46826e-05	3.99914e-06	0.272372	7.43942e-06	1.41483e-06	0.190181	0	0	0.0563969	0.534056	0	0.155187	0	1
Q13228	SELENBP1	7	2	4	4	3	7.57252e-05	7.84289e-06	0.10357	1.52323e-05	2.7653e-05	1.81541	0	0	0.0567675	0.984556	0	0.127386	0	1
Q9H0W9	C11orf54	9	3	4	5	2	1.06072e-05	3.69611e-06	0.348451	3.26838e-06	3.2844e-06	1.0049	0	0	0.0571846	0.838778	0	0.0823588	1	1
P10643	C7	9	4	4	2	1	2.37161e-05	4.26453e-06	0.179815	1.17784e-05	3.23088e-06	0.274305	0	0	0.0572589	0.372116	0	0.175996	0	0.66142
Q9Y265	RUVBL1	19	13	10	10	12	1.36342e-05	8.39472e-06	0.61571	5.06427e-06	4.634e-06	0.915038	0	0	0.0573006	0.965406	0	0.043596	0	1
Q9P0J0	NDUFA13	6	1	0	1	0	1.75599e-06	6.82688e-07	0.388777	NaN	2.5609e-06	NA	0	0	0.0575426	NA	0	0.0914761	1	1
Q9ULT8	HECTD1	5	11	5	11	12	5.37915e-06	1.18344e-05	2.20006	4.09261e-06	1.23554e-05	3.01894	0	0	0.0582506	0.0543104	1	0.10534	1	0.10534
P0C869	PLA2G4B	4	10	6	10	11	8.31464e-06	1.87495e-05	2.255	1.52553e-05	2.2856e-05	1.49824	0	0	0.0588323	0.264892	1	0.0958456	1	0.333213
P00505	GOT2	20	19	17	19	17	0.000288312	0.000186426	0.646612	0.000167669	0.000217046	1.29449	0	1	0.0595638	0.267183	0	1	1	0.60499
P0DOY2	IGLC2	20	20	0	0	0	0.00616457	0.00320487	0.519885	NaN	NaN	NA	0	0	0.0595638	NA	0	1	0	1
O43242	PSMD3	20	16	18	16	16	2.15251e-05	1.57347e-05	0.730992	2.61194e-05	1.85085e-05	0.708611	0	1	0.0599905	0.238551	0	0.106029	0	0.66142
P24752	ACAT1	8	3	1	0	0	3.73864e-06	1.14525e-06	0.306328	2.44771e-06	NaN	NA	0	0	0.0609886	NA	0	0.155187	0	1
Q13630	GFUS	17	12	6	8	6	4.24678e-05	2.52829e-05	0.595343	1.46159e-05	1.78074e-05	1.21836	0	0	0.0611578	0.515056	0	0.155187	1	0.741054
P49721	PSMB2	9	3	10	7	6	2.50603e-05	9.07779e-06	0.362237	2.01182e-05	1.64291e-05	0.816626	0	0	0.0616881	0.537834	0	0.0823588	0	0.523107
P61457	PCBD1	7	2	0	0	0	7.65076e-06	2.09373e-06	0.273663	NaN	NaN	NA	0	0	0.0617475	NA	0	0.127386	0	1
P54727	RAD23B	19	17	12	11	9	6.23657e-05	4.73868e-05	0.759822	2.81883e-05	2.86016e-05	1.01466	0	0	0.0618552	0.943897	0	0.60499	0	1
P31946	YWHAB	20	20	20	20	19	0.0003357	0.000287168	0.855431	0.000296391	0.000293175	0.989149	0	1	0.0634324	0.564832	0	1	0	1
Q7Z6Z7	HUWE1	20	18	0	0	0	2.73425e-05	1.55668e-05	0.569326	NaN	NaN	NA	0	0	0.0638798	NA	0	0.487179	0	1
O75915	ARL6IP5	12	6	10	10	9	2.0053e-05	9.04755e-06	0.451182	1.82717e-05	1.61077e-05	0.881563	0	0	0.0641117	0.965406	0	0.11097	0	1
Q96NR8	RDH12	4	11	8	12	16	8.02455e-06	1.63712e-05	2.04014	1.84676e-05	3.29733e-05	1.78547	0	0	0.0641755	0.12902	1	0.0483721	1	0.343067
P13010	XRCC5	19	19	14	15	7	7.70622e-05	4.69314e-05	0.609007	4.0968e-05	4.41284e-05	1.07714	0	0	0.0658428	0.389233	0	1	1	1
Q13362	PPP2R5C	8	3	1	1	0	2.52766e-06	8.57694e-07	0.339324	1.88297e-07	3.37588e-07	1.79285	0	0	0.0658857	1	0	0.155187	0	1
P01031	C5	9	4	9	4	2	3.79758e-05	1.08473e-05	0.285638	1.53455e-05	6.06935e-06	0.395514	0	0	0.0663094	0.114953	0	0.175996	0	0.175996
Q5IS74,O14773	TPP1	18	14	9	14	9	5.4835e-05	3.45867e-05	0.63074	1.99864e-05	3.01829e-05	1.51017	0	0	0.0667851	0.242734	0	0.235116	1	0.200287
P62854,Q5JNZ5	RPS26,RPS26P11	11	5	9	6	9	3.84748e-05	2.06488e-05	0.536685	3.48498e-05	2.84249e-05	0.81564	0	0	0.0668447	0.629676	0	0.10534	0	0.514476
P02746	C1QB	7	2	2	0	1	1.55923e-05	5.2792e-06	0.338578	6.05532e-06	NaN	NA	0	0	0.0670837	NA	0	0.127386	0	0.487179
P00746	CFD	5	1	3	1	0	1.14178e-05	1.76892e-06	0.154927	5.50856e-06	1.42378e-06	0.258466	0	0	0.067464	0.29879	0	0.181764	0	0.60499
P12277	CKB	5	1	2	6	4	2.86769e-06	1.27871e-07	0.0445903	3.51154e-06	1.03268e-05	2.94082	0	0	0.067464	0.157628	0	0.181764	1	0.235116
P55327	TPD52	5	1	3	6	4	5.38815e-06	4.65611e-07	0.0864138	5.5822e-06	7.09485e-06	1.27098	0	0	0.067464	0.309018	0	0.181764	1	0.450576
P01009	SERPINA1	20	20	20	20	19	0.00537249	0.00271212	0.504817	0.00426631	0.00194857	0.456734	0	1	0.0675011	0.0121656	0	1	0	1
P01834	IGKC	20	20	20	20	19	0.000966829	0.000639458	0.661397	0.00136561	0.000780048	0.57121	0	1	0.0675011	0.0131944	0	1	0	1
P02749	APOH	20	19	19	15	13	0.000412264	0.000171134	0.415108	0.000204674	8.07206e-05	0.394386	0	0	0.0675011	0.00374208	0	1	0	0.181764
P78344	EIF4G2	19	16	11	10	9	1.36366e-05	1.05655e-05	0.774791	5.85485e-06	4.42676e-06	0.756084	0	0	0.0676102	0.382647	0	0.341649	0	1
P21964	COMT	15	14	10	10	4	6.07107e-05	3.71908e-05	0.612591	3.53189e-05	2.95323e-05	0.836161	0	0	0.0691122	0.873648	0	1	0	1
Q9UHA7	IL36A	8	13	11	11	15	4.79315e-05	0.000125817	2.62494	5.08553e-05	7.04711e-05	1.38572	0	0	0.0691226	0.609586	1	0.204927	0	1
P84103	SRSF3	11	5	9	8	5	2.40405e-05	1.11455e-05	0.463615	1.97262e-05	1.58939e-05	0.805723	0	0	0.0715184	0.729634	0	0.10534	0	1
Q01518,P40123	CAP1,CAP2	20	20	20	20	19	0.000773742	0.000633745	0.819065	0.000593562	0.00059655	1.00503	0	1	0.0717768	0.429082	0	1	0	1
P17174	GOT1	20	15	14	8	5	4.7103e-05	3.59856e-05	0.763978	3.16256e-05	1.42461e-05	0.45046	0	0	0.0717784	0.0592113	0	0.047124	0	0.11097
P36871	PGM1	20	15	19	16	8	9.79185e-05	6.3983e-05	0.653431	5.76917e-05	4.27302e-05	0.740664	0	1	0.0717784	0.0906043	0	0.047124	0	0.341649
P51148	RAB5C	20	15	17	15	15	3.25766e-05	2.31299e-05	0.710018	2.62288e-05	2.21673e-05	0.845148	0	0	0.0717784	0.370151	0	0.047124	0	0.694765
P25815	S100P	20	17	12	13	8	0.000479207	0.000309303	0.645446	0.000232771	0.000245825	1.05608	0	0	0.071992	0.749284	0	0.230769	1	1
Q03591,Q9BXR6	CFHR1,CFHR5	7	2	0	0	1	6.29135e-06	1.85904e-06	0.295491	NaN	NaN	NA	0	0	0.0727939	NA	0	0.127386	0	1
O95716,P20337,Q96E17	RAB3D,RAB3B,RAB3C	13	16	11	11	4	1.75337e-05	2.66388e-05	1.51929	1.87115e-05	2.15402e-05	1.15117	0	0	0.0733974	0.712267	1	0.480115	0	1
P61225,P10114	RAP2B,RAP2A	15	14	4	5	1	8.00862e-06	4.87495e-06	0.608712	1.9255e-06	2.03842e-06	1.05865	0	0	0.0733974	0.838778	0	1	1	1
P00734	F2	10	5	10	4	4	0.000118902	4.05495e-05	0.341034	5.35367e-05	9.90321e-06	0.18498	0	0	0.0736564	0.0678603	0	0.190793	0	0.0958456
P02753	RBP4	10	5	5	3	1	5.05647e-05	2.23328e-05	0.441667	2.02328e-05	8.3691e-06	0.413641	0	0	0.0736564	0.352807	0	0.190793	0	0.694765
P12955	PEPD	5	1	6	8	1	6.73826e-06	9.93303e-07	0.147412	4.99315e-06	8.80558e-06	1.76353	0	0	0.074256	0.382515	0	0.181764	1	0.741054
Q16543	CDC37	5	1	4	1	0	9.03016e-06	1.25189e-06	0.138635	9.8609e-06	2.16196e-06	0.219245	0	0	0.074256	0.151076	0	0.181764	0	0.341649
O60235,Q8WZ64	TMPRSS11D,ARAP2	14	18	16	16	19	0.000149428	0.000249466	1.66948	0.000212474	0.000289803	1.36395	0	1	0.075272	0.138854	1	0.235116	0	1
P38159,Q96E39,O75526,Q8N7X1	RBMX,RBMXL1,RBMXL2,RBMXL3	16	11	7	4	1	1.69684e-05	1.00029e-05	0.5895	2.12676e-05	9.45594e-06	0.444617	0	0	0.0758477	0.362292	0	0.175996	0	0.480115
P23528,Q9Y281	CFL1,CFL2	20	20	20	20	19	0.000897716	0.000721604	0.803822	0.000743466	0.000702833	0.945347	0	1	0.0762662	0.276627	0	1	0	1
P00751	CFB	17	13	18	14	11	0.000393952	0.000109996	0.27921	0.000187117	9.10971e-05	0.486845	0	0	0.0763907	0.0896341	0	0.273343	0	0.235116
A0A075B6K5,A0A075B6K2	IGLV3-9,IGLV3-12	11	5	0	0	0	7.83552e-05	4.41819e-05	0.563867	NaN	NaN	NA	0	0	0.0764566	NA	0	0.10534	0	1
P26196	DDX6	9	4	6	5	3	5.8972e-06	2.22736e-06	0.377698	5.44041e-06	4.94988e-06	0.909837	0	0	0.0765069	0.904228	0	0.175996	0	1
P61201	COPS2	13	10	13	8	4	5.45208e-06	2.84409e-06	0.521652	7.33226e-06	4.82322e-06	0.657808	0	0	0.0785255	0.202747	0	0.523107	0	0.204927
O14579	COPE	11	4	11	10	7	6.99862e-06	3.45571e-06	0.49377	5.27417e-06	4.11972e-06	0.781113	0	0	0.07881	0.519551	0	0.0483721	0	1
Q96CW1	AP2M1	10	5	6	5	2	7.15873e-06	3.02076e-06	0.421969	4.35434e-06	3.06542e-06	0.703993	0	0	0.07881	0.618149	0	0.190793	0	1
P20618	PSMB1	16	10	16	12	14	4.64325e-05	2.82001e-05	0.607336	4.47839e-05	3.33169e-05	0.743947	0	0	0.0791644	0.24387	0	0.0958456	0	0.300845
P05090	APOD	16	11	16	9	8	0.000162366	7.23517e-05	0.445609	8.60889e-05	4.56169e-05	0.529882	0	0	0.0805021	0.046925	0	0.175996	0	0.0483721
P20810	CAST	20	19	19	17	16	0.000178499	0.000137646	0.771128	0.000140582	0.000112499	0.80024	0	1	0.0809763	0.665011	0	1	0	0.60499
Q99460	PSMD1	20	18	17	16	16	2.97935e-05	2.39638e-05	0.804329	2.91307e-05	2.86062e-05	0.981995	0	1	0.0810175	0.559819	0	0.487179	0	1
P05155	SERPING1	17	13	18	11	10	0.00047491	0.000168572	0.354955	0.000343541	0.000126644	0.368643	0	0	0.0810264	0.0114597	0	0.273343	0	0.0309503
P34913	EPHX2	7	3	10	10	5	5.75934e-06	1.16337e-06	0.201998	1.11598e-05	8.72832e-06	0.782125	0	0	0.081348	0.919393	0	0.273343	0	1
O96000	NDUFB10	5	1	2	2	1	4.89516e-06	1.00636e-06	0.205582	3.47544e-06	2.31183e-06	0.66519	0	0	0.0815967	1	0	0.181764	0	1
P02654	APOC1	5	1	2	1	1	1.35842e-05	2.3651e-06	0.174106	4.71643e-06	3.23689e-06	0.686301	0	0	0.0815967	0.614695	0	0.181764	0	1
P13671	C6	9	4	2	1	0	1.8349e-05	5.93757e-06	0.323591	2.90753e-06	1.62718e-06	0.559643	0	0	0.082066	0.573704	0	0.175996	0	1
Q13155	AIMP2	16	13	2	7	4	1.02776e-05	7.23274e-06	0.70374	1.02384e-06	4.41642e-06	4.31358	0	0	0.0826196	0.0567675	0	0.480115	1	0.127386
Q14019	COTL1	12	5	9	6	2	5.55211e-05	2.88915e-05	0.52037	4.96985e-05	3.16795e-05	0.637435	0	0	0.0839775	0.342717	0	0.053551	0	0.514476
P02652	APOA2	10	6	8	6	5	0.000373654	9.02255e-05	0.241468	0.000183248	0.000102121	0.557285	0	0	0.0843819	0.382515	0	0.333213	0	0.741054
P21912	SDHB	7	2	4	2	0	6.14559e-06	1.916e-06	0.311768	8.99257e-06	3.5863e-06	0.398807	0	0	0.0854077	0.395893	0	0.127386	0	0.66142
P52943	CRIP2	7	2	4	0	0	7.7146e-06	2.85402e-06	0.36995	4.80333e-06	NaN	NA	0	0	0.0854077	NA	0	0.127386	0	0.106029
P15309	ACP3	7	11	11	14	17	1.89382e-05	4.80537e-05	2.53739	0.000293447	4.1222e-05	0.140475	0	0	0.0857781	0.878521	1	0.340644	1	0.514476
P02790	HPX	20	20	20	19	14	0.00225718	0.000943186	0.41786	0.00116825	0.000542148	0.46407	0	1	0.085914	0.00671501	0	1	0	1
P04632	CAPNS1	20	19	19	20	15	0.000220366	0.000165938	0.753012	0.000139085	0.000189621	1.36335	0	1	0.085914	0.085914	0	1	1	1
Q9Y490,Q9Y4G6	TLN1,TLN2	20	19	0	0	0	0.000305751	0.000225515	0.737577	NaN	NaN	NA	0	0	0.085914	NA	0	1	0	1
Q15075	EEA1	14	8	9	12	10	1.30826e-05	7.23353e-06	0.552913	1.14092e-05	1.59919e-05	1.40167	0	0	0.0860889	0.148316	0	0.11097	1	0.527254
P54652	HSPA2	9	5	8	10	5	6.54563e-06	2.43637e-06	0.372214	8.31121e-06	8.43302e-06	1.01466	0	0	0.0863838	0.711173	0	0.320266	1	0.751186
P42704	LRPPRC	8	3	4	2	0	1.83065e-05	1.60921e-06	0.0879033	1.05003e-05	1.15277e-05	1.09784	0	0	0.0888134	0.395893	0	0.155187	0	0.66142
P62993	GRB2	16	10	9	5	2	2.02419e-05	1.2307e-05	0.607996	1.70404e-05	8.10744e-06	0.475776	0	0	0.0890816	0.144085	0	0.0958456	0	0.320266
P04229,Q29974,Q30154,Q30134,P13761	HLA-DRB1,HLA-DRB5	5	1	0	0	0	1.62799e-05	4.30781e-06	0.26461	NaN	NaN	NA	0	0	0.0895157	NA	0	0.181764	0	1
P60891	PRPS1	5	1	9	6	8	6.8587e-06	1.23692e-06	0.180343	1.26875e-05	8.5684e-06	0.675343	0	0	0.0895157	0.358775	0	0.181764	0	0.514476
O15511	ARPC5	17	10	10	2	2	7.16124e-05	4.50641e-05	0.629278	3.72116e-05	8.83206e-06	0.237347	0	0	0.0905065	0.0106939	0	0.0407424	0	0.0138141
P21796	VDAC1	20	17	16	16	8	0.000120246	8.93927e-05	0.743413	5.85031e-05	6.65341e-05	1.13727	0	1	0.0908468	0.335004	0	0.230769	0	1
P45974,Q92995	USP5,USP13	19	18	11	16	15	2.96243e-05	2.28058e-05	0.769834	1.48116e-05	2.2412e-05	1.51314	0	0	0.0908468	0.302	0	1	1	0.175996
P00492	HPRT1	19	13	12	8	2	3.37866e-05	2.35082e-05	0.695784	1.99507e-05	1.01281e-05	0.507655	0	0	0.0922295	0.102336	0	0.043596	0	0.343067
P02750	LRG1	13	8	13	9	7	6.32142e-05	3.23029e-05	0.511007	4.00391e-05	2.3608e-05	0.589623	0	0	0.0940327	0.156041	0	0.204927	0	0.340644
P62899	RPL31	12	9	4	6	3	1.87173e-05	8.85946e-06	0.47333	1.05463e-05	1.15515e-05	1.09531	0	0	0.0940327	0.606021	0	0.527254	1	0.716427
Q14914	PTGR1	13	9	9	12	12	3.27725e-05	1.85231e-05	0.565202	3.05836e-05	4.1005e-05	1.34075	0	0	0.0941612	0.414625	0	0.340644	1	0.527254
P13073	COX4I1	12	6	12	8	3	2.31815e-05	1.27374e-05	0.549465	2.70179e-05	2.00414e-05	0.741783	0	0	0.0941959	0.633306	0	0.11097	0	0.343067
Q96CN7	ISOC1	11	6	5	7	2	9.37092e-06	3.84026e-06	0.409806	4.10038e-06	5.67215e-06	1.38332	0	0	0.0953249	0.462909	0	0.200287	1	0.731094
O14980	XPO1	18	16	12	13	8	2.52908e-05	1.8134e-05	0.717021	1.68774e-05	1.97356e-05	1.16936	0	0	0.09565	0.856655	0	0.66142	1	1
P26640	VARS1	20	15	12	13	11	2.35825e-05	1.64507e-05	0.697579	1.01067e-05	1.09016e-05	1.07865	0	0	0.0958842	0.834898	0	0.047124	1	1
P42226	STAT6	10	5	3	0	0	5.76257e-06	2.38773e-06	0.414352	2.85759e-06	NaN	NA	0	0	0.096051	NA	0	0.190793	0	0.230769
O15145	ARPC3	20	17	19	18	14	0.000187178	0.000137705	0.735692	0.000181006	0.000141458	0.781513	0	1	0.0961339	0.189461	0	0.230769	0	1
P02763	ORM1	20	17	19	14	11	0.00162992	0.000734752	0.450791	0.000517743	0.0002157	0.416616	0	0	0.0961339	0.00755221	0	0.230769	0	0.0914761
P31944	CASP14	12	8	7	8	7	5.5181e-05	2.00575e-05	0.363485	2.3361e-05	1.04987e-05	0.44941	0	0	0.0964028	0.913298	0	0.343067	1	1
P52907	CAPZA1	20	20	19	20	16	0.000181299	0.000160153	0.883363	0.000134576	0.000116121	0.862865	0	1	0.0964996	0.210964	0	1	1	1
O14880	MGST3	5	1	1	1	0	6.27087e-06	1.31666e-06	0.209965	4.734e-06	4.37867e-06	0.924941	0	0	0.098042	1	0	0.181764	0	1
O75891,Q3SY69	ALDH1L1,ALDH1L2	5	1	1	3	0	1.03737e-05	2.71836e-06	0.262043	3.85761e-06	1.22985e-05	3.18812	0	0	0.098042	0.323604	0	0.181764	1	0.60499
P09871	C1S	5	1	4	1	1	7.94303e-06	2.15122e-06	0.270832	6.30725e-06	1.3199e-06	0.209267	0	0	0.098042	0.151076	0	0.181764	0	0.341649
Q5SSJ5	HP1BP3	18	13	13	7	5	5.58407e-05	3.46918e-05	0.621263	4.48757e-05	2.47993e-05	0.552622	0	0	0.0998008	0.148263	0	0.127386	0	0.112834
Q15019	SEPTIN2	16	11	10	9	6	1.03262e-05	6.30152e-06	0.610247	1.07014e-05	7.61913e-06	0.711976	0	0	0.101488	0.692986	0	0.175996	0	1
Q9Y315	DERA	7	3	3	4	0	3.08874e-06	7.7885e-07	0.252158	1.68148e-06	1.36054e-06	0.809127	0	0	0.101796	0.790644	0	0.273343	1	1
O75083	WDR1	20	20	20	20	19	0.000647363	0.000560575	0.865935	0.000591458	0.000533347	0.90175	0	1	0.102161	0.494523	0	1	0	1
P0DMV9,P0DMV8	HSPA1B,HSPA1A	20	20	20	20	19	0.0030683	0.00231939	0.75592	0.00166963	0.00178958	1.07184	0	1	0.102161	0.301253	0	1	0	1
P55957	BID	10	5	7	5	1	8.57134e-06	3.67429e-06	0.428672	6.78847e-06	6.68371e-06	0.984568	0	0	0.102427	0.664458	0	0.190793	0	0.731094
Q12906,Q96SI9	ILF3,STRBP	10	5	0	0	0	2.04734e-05	7.38678e-06	0.3608	NaN	NaN	NA	0	0	0.102427	NA	0	0.190793	0	1
Q96PD5	PGLYRP2	9	6	10	2	1	3.12319e-05	6.72661e-06	0.215376	9.33237e-06	7.94858e-07	0.0851722	0	0	0.102427	0.00481016	0	0.514476	0	0.0138141
Q12882	DPYD	14	8	6	7	0	1.57607e-05	8.58548e-06	0.544741	9.51245e-06	9.0214e-06	0.948379	0	0	0.102829	0.757502	0	0.11097	1	1
P39019	RPS19	11	7	6	10	3	3.59822e-05	1.67686e-05	0.466025	3.05544e-05	4.56294e-05	1.49338	0	0	0.103263	0.20493	0	0.340644	1	0.333213
Q96JY6	PDLIM2	9	16	6	13	14	3.64616e-05	7.04359e-05	1.93178	1.38465e-05	3.91041e-05	2.82412	0	0	0.104012	0.018562	1	0.0483721	1	0.0561609
P00387	CYB5R3	19	19	15	15	13	3.94424e-05	3.09173e-05	0.78386	2.84045e-05	2.64941e-05	0.932741	0	0	0.104572	0.723036	0	1	0	1
P02774	GC	19	16	18	15	13	0.00118077	0.000475248	0.402489	0.000653399	0.000258032	0.394907	0	0	0.107181	0.013079	0	0.341649	0	0.407484
P30048	PRDX3	20	15	14	10	4	6.78848e-05	3.9872e-05	0.587349	5.58082e-05	4.69997e-05	0.842166	0	0	0.107181	0.442011	0	0.047124	0	0.333213
P06727	APOA4	10	7	10	5	4	0.000147203	3.263e-05	0.221666	9.29838e-05	2.0747e-05	0.223125	0	0	0.107869	0.0598269	0	0.523107	0	0.190793
P01008	SERPINC1	20	19	18	20	16	0.000608826	0.000290769	0.47759	0.000447688	0.000227136	0.507354	0	1	0.108077	0.0438705	0	1	1	0.487179
P18206	VCL	20	19	20	20	19	0.000353598	0.00027994	0.791691	0.000306358	0.000284448	0.92848	0	1	0.108077	0.529097	0	1	0	1
P51649	ALDH5A1	6	2	1	1	0	1.47441e-05	3.90472e-06	0.264833	3.94202e-06	6.80528e-06	1.72634	0	0	0.108127	1	0	0.235116	0	1
Q9P1F3	ABRACL	6	2	3	1	0	2.34751e-06	5.9178e-07	0.252088	9.77894e-07	1.72753e-07	0.176658	0	0	0.108127	0.275281	0	0.235116	0	0.60499
Q16719	KYNU	12	8	4	4	0	1.05852e-05	5.44177e-06	0.514095	4.56964e-06	5.61606e-06	1.22899	0	0	0.108555	0.953691	0	0.343067	0	1
P08185	SERPINA6	10	6	8	3	1	6.54854e-05	2.33242e-05	0.356175	2.92993e-05	1.06372e-05	0.363054	0	0	0.108796	0.0825518	0	0.333213	0	0.155187
P36955	SERPINF1	10	6	11	5	5	5.80534e-05	1.63711e-05	0.282	2.6228e-05	7.96451e-06	0.303664	0	0	0.108796	0.0582506	0	0.333213	0	0.10534
P61966	AP1S1	15	11	10	8	5	9.04872e-06	5.47823e-06	0.605414	4.73013e-06	4.89909e-06	1.03572	0	0	0.108824	0.893955	0	0.320266	0	0.751186
Q6NVY1	HIBCH	15	10	5	6	4	2.84309e-05	1.37498e-05	0.483624	2.64967e-05	1.63371e-05	0.616571	0	0	0.110061	0.823182	0	0.190793	1	1
P43652	AFM	11	9	13	6	4	0.000154685	4.28603e-05	0.277081	5.99218e-05	1.7659e-05	0.2947	0	0	0.111775	0.0200737	0	0.752371	0	0.0561609
P08571	CD14	8	4	8	1	1	1.34429e-05	3.95576e-06	0.294263	5.21213e-06	7.14709e-07	0.137124	0	0	0.112986	0.011278	0	0.300845	0	0.019656
Q99523	SORT1	4	8	3	7	2	2.68271e-06	6.01268e-06	2.24127	1.39602e-06	4.68271e-06	3.35433	0	0	0.112986	0.101796	1	0.300845	1	0.273343
O00764	PDXK	12	6	1	0	0	1.88182e-05	1.01398e-05	0.538829	1.39351e-06	NaN	NA	0	0	0.113012	NA	0	0.11097	0	1
O15143	ARPC1B	20	17	17	11	9	0.00021865	0.000165661	0.757654	0.000213954	0.000129482	0.605186	0	0	0.113484	0.0840803	0	0.230769	0	0.0823588
P02787	TF	20	20	20	20	19	0.0168747	0.00770765	0.456758	0.0106101	0.00500625	0.471839	0	1	0.114254	0.0121656	0	1	0	1
P30085	CMPK1	20	20	20	20	19	0.000178849	0.00016423	0.918259	0.000100563	0.000104963	1.04375	0	1	0.114254	0.583114	0	1	0	1
P09488	GSTM1	10	7	8	6	8	0.000178471	7.81669e-05	0.437981	4.64581e-05	1.58142e-05	0.340398	0	0	0.114613	0.455516	0	0.523107	0	0.741054
P23381	WARS1	17	15	12	11	3	0.000152777	8.07461e-05	0.528521	3.83739e-05	2.37801e-05	0.619694	0	0	0.115228	0.278483	0	0.694765	0	1
Q05655,Q04759	PRKCD,PRKCQ	14	8	11	8	3	1.73818e-05	1.06519e-05	0.612816	1.3299e-05	8.46619e-06	0.636606	0	0	0.115361	0.193123	0	0.11097	0	0.527254
P29317,P54762,P54764,P54760,Q15375,P54753,Q9UF33,P29323	EPHA2,EPHB1,EPHA4,EPHB4,EPHA7,EPHB3,EPHA6,EPHB2	4	10	0	0	0	4.68149e-06	9.78289e-06	2.0897	NaN	NaN	NA	0	0	0.115976	NA	1	0.0958456	0	1
Q16186	ADRM1	16	13	13	11	5	1.00119e-05	6.91983e-06	0.691163	9.31922e-06	8.34763e-06	0.895743	0	0	0.116024	0.674963	0	0.480115	0	0.747527
Q16698	DECR1	19	15	10	8	2	4.89045e-05	3.22096e-05	0.658622	2.10937e-05	1.34664e-05	0.63841	0	0	0.11607	0.563509	0	0.181764	0	0.751186
O43815	STRN	6	2	6	5	8	2.64667e-06	8.92832e-07	0.337342	3.4602e-06	3.42391e-06	0.989511	0	0	0.116892	0.958874	0	0.235116	0	1
P01782,P0DP04	IGHV3-9,IGHV3-43D	6	2	1	0	0	1.9551e-05	5.73215e-06	0.293189	5.4819e-06	NaN	NA	0	0	0.116892	NA	0	0.235116	0	1
P09668	CTSH	6	2	2	1	0	5.17251e-06	1.35094e-06	0.261178	4.17984e-06	7.93345e-06	1.89803	0	0	0.116892	0.614695	0	0.235116	0	1
Q63HN8	RNF213	6	2	3	0	0	2.81757e-06	9.04521e-07	0.321029	2.08886e-06	NaN	NA	0	0	0.116892	NA	0	0.235116	0	0.230769
Q15631	TSN	7	3	4	4	1	1.04295e-05	4.15968e-06	0.398837	6.0868e-06	4.7652e-06	0.782874	0	0	0.117567	0.984556	0	0.273343	0	1
Q9NUQ9	CYRIB	20	12	14	6	4	5.41894e-05	3.94135e-05	0.727328	3.93855e-05	1.65461e-05	0.420106	0	0	0.118395	0.0170608	0	0.003276	0	0.0256448
P53004	BLVRA	19	18	15	13	7	4.18319e-05	3.20391e-05	0.765903	2.52903e-05	2.24155e-05	0.886331	0	0	0.119786	0.978124	0	1	0	0.731094
Q9BRA2	TXNDC17	20	17	18	15	12	0.000132358	9.73023e-05	0.735146	6.99941e-05	6.17103e-05	0.881651	0	0	0.119786	0.439546	0	0.230769	0	0.407484
P20073	ANXA7	20	18	18	19	19	0.000119524	8.31801e-05	0.695929	7.46513e-05	9.74107e-05	1.30488	0	1	0.119838	0.273195	0	0.487179	1	1
P18621	RPL17	17	10	8	4	4	3.81327e-05	2.301e-05	0.603418	1.36365e-05	8.11769e-06	0.59529	0	0	0.11992	0.236209	0	0.0407424	0	0.300845
P50395	GDI2	20	20	20	20	19	0.000478875	0.000444516	0.92825	0.000382685	0.000356148	0.930657	0	1	0.1207	0.340785	0	1	0	1
P50991	CCT4	20	19	19	20	19	9.44318e-05	7.34446e-05	0.777753	7.80813e-05	7.88886e-05	1.01034	0	1	0.1207	0.925426	0	1	1	1
P35908	KRT2	14	16	17	19	18	9.44668e-05	0.000679756	7.19571	0.000586287	0.000716747	1.22252	0	1	0.123488	0.551589	1	0.716427	1	0.60499
P19823	ITIH2	11	8	11	6	4	0.000108916	3.60953e-05	0.331405	7.86719e-05	3.44879e-05	0.438376	0	0	0.124696	0.0953249	0	0.527254	0	0.200287
Q14980	NUMA1	14	9	14	15	13	2.5833e-05	9.42582e-06	0.364875	8.71045e-05	0.000131892	1.51418	0	0	0.125001	0.0475143	0	0.200287	1	1
Q13557,Q9UQM7	CAMK2D,CAMK2A	13	8	7	3	2	1.45912e-05	8.70865e-06	0.596841	6.54146e-06	2.84247e-06	0.434532	0	0	0.125676	0.135194	0	0.204927	0	0.273343
P25787	PSMA2	7	3	7	3	2	1.2047e-05	3.92745e-06	0.32601	8.42067e-06	3.92836e-06	0.466514	0	0	0.126141	0.200366	0	0.273343	0	0.273343
O43278	SPINT1	6	2	2	0	0	7.69401e-06	2.68687e-06	0.349216	1.53548e-06	NaN	NA	0	0	0.126205	NA	0	0.235116	0	0.487179
P20042	EIF2S2	2	6	2	3	0	1.17118e-06	3.29237e-06	2.81117	1.14921e-06	1.61471e-06	1.40506	0	0	0.126205	0.654732	1	0.235116	1	1
P00450	CP	19	18	20	19	15	0.000750334	0.000315168	0.420037	0.000546051	0.000219927	0.402759	0	1	0.126359	0.00948361	0	1	0	1
P28838	LAP3	19	18	16	14	13	7.13195e-05	3.63621e-05	0.509847	3.58551e-05	3.02432e-05	0.843486	0	0	0.126359	0.967381	0	1	0	0.716427
Q15008	PSMD6	19	18	16	16	17	2.3376e-05	1.95525e-05	0.836437	1.76405e-05	1.97053e-05	1.11705	0	1	0.126359	0.505824	0	1	0	1
Q9H4A4	RNPEP	20	20	20	20	19	0.000145334	0.000120725	0.830672	0.000125027	0.000108208	0.865472	0	1	0.127419	0.288767	0	1	0	1
Q9Y3U8	RPL36	9	5	5	9	4	2.14563e-05	9.52246e-06	0.443807	9.61722e-06	1.57369e-05	1.63633	0	0	0.127444	0.153007	0	0.320266	1	0.320266
P28070	PSMB4	14	8	6	3	1	3.20287e-05	1.87239e-05	0.584598	1.55419e-05	9.02449e-06	0.580657	0	0	0.129063	0.275154	0	0.11097	0	0.450576
O95372	LYPLA2	10	7	2	0	0	1.56215e-05	7.09822e-06	0.454388	5.86749e-06	NaN	NA	0	0	0.129093	NA	0	0.523107	0	0.487179
P46779	RPL28	11	6	7	8	1	2.43625e-05	1.3196e-05	0.54165	1.19578e-05	1.5869e-05	1.32708	0	0	0.129093	0.544105	0	0.200287	1	1
P49591	SARS1	16	14	9	11	4	2.63504e-05	1.85918e-05	0.705563	1.23598e-05	1.73211e-05	1.4014	0	0	0.130271	0.401748	0	0.716427	1	0.752371
Q6XPR3	RPTN	5	8	10	12	17	9.63156e-06	0.000177775	18.4575	0.000194291	0.000231874	1.19344	0	0	0.130709	0.341908	1	0.500603	1	0.751186
P01011	SERPINA3	18	13	18	14	11	0.00048468	0.000257097	0.530446	0.000428746	0.000175154	0.408527	0	0	0.131094	0.0111104	0	0.127386	0	0.235116
P63173	RPL38	10	5	2	4	0	1.63032e-05	8.01937e-06	0.491889	2.03389e-06	5.78137e-06	2.84252	0	0	0.131359	0.306247	0	0.190793	1	0.66142
Q5TEJ8	THEMIS2	10	5	11	3	2	2.01097e-06	1.05004e-06	0.522159	3.85768e-06	1.09176e-06	0.28301	0	0	0.131359	0.0110716	0	0.190793	0	0.0187011
Q11128,P21217,P51993	FUT5,FUT3,FUT6	16	16	0	0	0	1.19882e-05	9.07154e-06	0.756707	NaN	NaN	NA	0	0	0.131752	NA	0	1	0	1
P04179	SOD2	16	10	11	10	4	7.03704e-05	4.32685e-05	0.614868	5.89225e-05	5.23329e-05	0.888165	0	0	0.131878	0.699184	0	0.0958456	0	1
Q15738	NSDHL	9	13	15	14	14	8.02926e-06	1.33356e-05	1.66088	1.49512e-05	1.89276e-05	1.26596	0	0	0.132679	0.651986	1	0.340644	0	1
Q15257	PTPA	19	16	16	16	13	6.20333e-05	4.64196e-05	0.748301	3.20662e-05	3.54773e-05	1.10638	0	1	0.132919	0.541174	0	0.341649	0	1
P61224,A6NIZ1	RAP1B	20	17	17	15	14	0.000119379	8.84021e-05	0.740514	0.000106255	8.81027e-05	0.829164	0	0	0.13321	0.370151	0	0.230769	0	0.694765
P60903	S100A10	20	18	18	14	16	0.000194784	0.000129983	0.667322	0.00017788	9.71486e-05	0.546149	0	0	0.133265	0.0628466	0	0.487179	0	0.235116
Q13561	DCTN2	17	13	12	11	13	1.68389e-05	1.18978e-05	0.706564	1.43281e-05	1.32033e-05	0.921495	0	0	0.133769	0.832796	0	0.273343	0	1
Q14847	LASP1	20	19	17	16	13	0.000111041	8.71072e-05	0.784458	0.000122955	8.18866e-05	0.665991	0	1	0.134419	0.170802	0	1	0	1
Q92905	COPS5	7	3	3	2	1	5.59358e-06	2.18741e-06	0.391057	9.34974e-07	8.92596e-07	0.954675	0	0	0.135194	0.72405	0	0.273343	0	1
Q15005	SPCS2	15	11	4	3	0	3.79545e-06	2.38342e-06	0.627967	1.62624e-06	1.42785e-06	0.878008	0	0	0.13546	0.728472	0	0.320266	0	1
O95834,O00423	EML2,EML1	17	17	0	0	0	8.50845e-05	5.48995e-05	0.645235	NaN	NaN	NA	0	0	0.136171	NA	0	1	0	1
P61106	RAB14	19	19	20	19	19	0.000113815	9.21742e-05	0.809863	8.51227e-05	8.09645e-05	0.951151	0	1	0.136797	0.861987	0	1	0	1
P07357	C8A	8	4	4	3	2	1.51569e-05	5.3333e-06	0.351874	6.50029e-06	2.66603e-06	0.410141	0	0	0.137593	0.609681	0	0.300845	0	1
Q13409	DYNC1I2	4	1	2	0	0	1.00466e-05	1.06112e-06	0.105619	4.04832e-06	NaN	NA	0	0	0.138124	NA	0	0.341649	0	0.487179
Q5VW32	BROX	4	1	3	0	0	2.23188e-06	3.4918e-07	0.156451	2.04922e-06	NaN	NA	0	0	0.138124	NA	0	0.341649	0	0.230769
Q6P1M0	SLC27A4	1	4	3	4	10	8.93023e-07	4.10998e-06	4.60233	1.94924e-06	3.3625e-06	1.72503	0	0	0.138124	0.581379	1	0.341649	1	1
P78417	GSTO1	20	17	18	16	14	0.000114151	8.71775e-05	0.763703	8.16421e-05	6.65063e-05	0.814609	0	1	0.140345	0.408585	0	0.230769	0	0.66142
Q04917	YWHAH	17	13	13	9	4	4.97539e-05	3.35117e-05	0.67355	4.31128e-05	3.81517e-05	0.884926	0	0	0.140982	0.281003	0	0.273343	0	0.340644
P07900,Q14568,Q58FG1	HSP90AA1,HSP90AA2P,HSP90AA4P	20	20	20	20	19	0.000697274	0.000569327	0.816503	0.000492934	0.00061107	1.23966	0	1	0.141705	0.201194	0	1	0	1
P49368,P68626	CCT3,A	20	20	20	20	19	0.000141528	0.000116908	0.826042	0.000107783	0.000129279	1.19944	0	1	0.141705	0.0762662	0	1	0	1
P53597	SUCLG1	14	10	2	4	0	2.7386e-05	1.57091e-05	0.573617	6.73394e-06	7.56122e-06	1.12285	0	0	0.142182	0.446117	0	0.333213	1	0.66142
O43653	PSCA	15	11	10	9	5	0.000151876	7.52685e-05	0.495593	5.66913e-05	8.00511e-05	1.41205	0	0	0.142848	0.872214	0	0.320266	0	1
P49773	HINT1	9	5	6	2	0	4.19435e-05	2.16156e-05	0.515349	1.93416e-05	7.46824e-06	0.386124	0	0	0.144085	0.157628	0	0.320266	0	0.235116
Q8N1G4	LRRC47	9	5	8	9	3	9.76688e-06	6.50208e-06	0.665728	1.31014e-05	1.23471e-05	0.942427	0	0	0.144085	0.707166	0	0.320266	1	1
P03952,P03951	KLKB1,F11	7	3	0	0	0	9.3671e-06	3.41011e-06	0.364052	NaN	NaN	NA	0	0	0.144741	NA	0	0.273343	0	1
P29622	SERPINA4	7	3	2	1	0	2.32338e-05	7.53361e-06	0.324253	3.67097e-06	1.37733e-06	0.375194	0	0	0.144741	0.534056	0	0.273343	0	1
P54577	YARS1	7	3	4	3	0	4.72023e-06	1.83928e-06	0.38966	3.85819e-06	2.07495e-06	0.537804	0	0	0.144741	0.581379	0	0.273343	0	1
P63010	AP2B1	7	3	1	0	0	6.92644e-06	2.2385e-06	0.323182	9.06996e-07	NaN	NA	0	0	0.144741	NA	0	0.273343	0	1
O00204	SULT2B1	14	17	18	16	18	0.000267306	0.000396893	1.48479	0.00029863	0.000323815	1.08433	0	1	0.14556	0.714531	1	0.450576	0	0.66142
O75947	ATP5PD	11	7	6	5	0	1.12874e-05	6.90007e-06	0.611305	1.3683e-05	7.32431e-06	0.535287	0	0	0.146641	0.69259	0	0.340644	0	1
P62888	RPL30	17	16	16	20	15	5.23113e-05	3.97e-05	0.758918	3.92365e-05	5.50502e-05	1.40304	0	1	0.146781	0.0762929	0	1	1	0.106029
Q8IWA5	SLC44A2	10	6	11	4	6	1.50079e-05	6.83129e-06	0.455179	1.22985e-05	4.85123e-06	0.394456	0	0	0.146807	0.035744	0	0.333213	0	0.0483721
Q15046	KARS1	20	14	8	7	7	3.37108e-05	2.02749e-05	0.601435	8.93393e-06	7.86499e-06	0.880351	0	0	0.147181	0.839756	0	0.020196	0	1
Q92522	H1-10	12	7	10	4	2	1.66978e-05	9.86327e-06	0.590692	4.4145e-05	1.94163e-05	0.43983	0	0	0.147723	0.0779979	0	0.204927	0	0.0958456
P37837	TALDO1	20	20	20	20	19	0.000864682	0.000726181	0.839825	0.000666997	0.000648729	0.972611	0	1	0.149284	0.546823	0	1	0	1
P78371	CCT2	20	19	20	18	18	0.000138358	0.000111172	0.803508	9.56227e-05	8.52735e-05	0.89177	0	1	0.149284	0.694877	0	1	0	0.487179
Q13200	PSMD2	20	20	18	16	16	6.35244e-05	5.74966e-05	0.905109	4.66069e-05	3.97568e-05	0.853024	0	1	0.149284	0.506807	0	1	0	0.66142
P05455	SSB	4	1	3	1	0	4.59375e-06	9.3224e-07	0.202937	3.21301e-06	1.15122e-06	0.358299	0	0	0.151076	0.323604	0	0.341649	0	0.60499
P15170	GSPT1	4	1	0	0	0	3.84684e-06	7.76977e-07	0.201978	NaN	NaN	NA	0	0	0.151076	NA	0	0.341649	0	1
P18077	RPL35A	4	1	1	3	0	1.28358e-05	2.51585e-06	0.196002	3.29382e-06	1.38888e-05	4.21663	0	0	0.151076	0.29879	0	0.341649	1	0.60499
P52788	SMS	4	1	0	1	0	3.72801e-06	6.21987e-07	0.166841	NaN	7.40029e-07	NA	0	0	0.151076	NA	0	0.341649	1	1
P15531	NME1	9	5	20	17	12	1.28285e-05	6.13615e-06	0.47832	0.000154283	0.000146691	0.950792	0	1	0.153007	0.635881	0	0.320266	0	0.230769
Q96IJ6	GMPPA	7	3	0	1	0	4.91019e-06	2.13453e-06	0.434714	NaN	1.2714e-06	NA	0	0	0.154797	NA	0	0.273343	1	1
P60028,P31150	GDI1	20	14	15	14	13	3.84277e-05	2.4856e-05	0.646826	2.55042e-05	2.76073e-05	1.08246	0	0	0.154891	0.83757	0	0.020196	0	1
P08603	CFH	18	17	0	0	0	0.000300255	8.46077e-05	0.281786	NaN	NaN	NA	0	0	0.155182	NA	0	1	0	1
Q14203	DCTN1	19	16	20	19	15	3.29918e-05	2.55881e-05	0.775588	3.00666e-05	3.26789e-05	1.08688	0	1	0.155182	0.191751	0	0.341649	0	1
P53990	IST1	9	6	1	3	0	1.37864e-05	6.70047e-06	0.486019	1.26524e-06	6.10089e-06	4.82194	0	0	0.15694	0.275281	0	0.514476	1	0.60499
Q99816	TSG101	9	6	9	7	2	8.68757e-06	4.89053e-06	0.562935	5.77034e-06	3.59924e-06	0.623748	0	0	0.15694	0.409529	0	0.514476	0	0.747527
O15144	ARPC2	20	19	20	20	19	0.000353052	0.000285175	0.807743	0.000257293	0.000232184	0.90241	0	1	0.15716	0.413526	0	1	0	1
P07355,A6NMY6	ANXA2,ANXA2P2	20	20	20	20	19	0.00608227	0.00499287	0.820888	0.00507272	0.00496346	0.97846	0	1	0.15716	0.820148	0	1	0	1
P46940,Q86VI3	IQGAP1,IQGAP3	20	20	0	0	0	0.00114005	0.000994296	0.872154	NaN	NaN	NA	0	0	0.15716	NA	0	1	0	1
P53618	COPB1	20	19	19	19	18	3.92361e-05	3.0824e-05	0.785603	4.2921e-05	4.51424e-05	1.05175	0	1	0.15716	0.684911	0	1	0	1
Q2TAA2	IAH1	6	2	2	1	0	8.46686e-07	3.95766e-07	0.46743	1.63764e-07	1.05357e-07	0.643347	0	0	0.157628	0.573704	0	0.235116	0	1
P61006	RAB8A	16	12	0	0	0	1.01938e-05	6.72578e-06	0.659794	NaN	NaN	NA	0	0	0.157905	NA	0	0.300845	0	1
P07951	TPM2	2	5	3	2	2	4.72122e-06	2.04329e-05	4.32788	6.9256e-06	5.47306e-06	0.790265	0	0	0.158818	0.654732	1	0.407484	0	1
P13688	CEACAM1	16	14	13	13	8	0.000115376	8.06586e-05	0.699094	6.8257e-05	5.52177e-05	0.808968	0	0	0.160323	0.524861	0	0.716427	0	1
Q8NEX9	SDR9C7	5	9	11	14	15	7.64934e-06	1.48495e-05	1.94128	2.48578e-05	2.76876e-05	1.11384	0	0	0.162343	0.444735	1	0.320266	1	0.514476
P30679	GNA15	3	8	0	0	1	2.46329e-06	4.67494e-06	1.89784	NaN	NaN	NA	0	0	0.163834	NA	1	0.155187	0	1
P01019	AGT	17	13	17	11	7	0.000112625	4.31943e-05	0.383523	6.31439e-05	2.46055e-05	0.389674	0	0	0.164421	0.00995121	0	0.273343	0	0.0823588
P33176,Q12840,O60282	KIF5B,KIF5A,KIF5C	11	8	0	0	0	1.58232e-05	9.73392e-06	0.615167	NaN	NaN	NA	0	0	0.164793	NA	0	0.527254	0	1
A0A0C4DH67,A0A0C4DH69	IGKV1-8,IGKV1-9	4	1	1	0	0	3.92654e-06	1.09982e-06	0.280099	9.26972e-07	NaN	NA	0	0	0.164934	NA	0	0.341649	0	1
O00592	PODXL	4	1	2	0	2	1.79144e-05	1.98891e-06	0.111023	3.42607e-06	NaN	NA	0	0	0.164934	NA	0	0.341649	0	0.487179
O95299	NDUFA10	4	1	1	0	0	2.00611e-06	4.75308e-07	0.23693	2.10228e-06	NaN	NA	0	0	0.164934	NA	0	0.341649	0	1
Q13423	NNT	4	1	1	0	0	7.74954e-06	1.80645e-06	0.233104	5.13065e-06	NaN	NA	0	0	0.164934	NA	0	0.341649	0	1
Q8IZ07,Q6ZTN6	ANKRD13A,ANKRD13D	4	1	7	3	2	1.1444e-06	2.74902e-07	0.240215	3.53985e-06	1.58083e-06	0.44658	0	0	0.164934	0.154797	0	0.341649	0	0.273343
Q9BUT1	BDH2	4	1	1	1	0	1.17752e-05	2.45835e-06	0.208774	2.0436e-06	4.09455e-06	2.0036	0	0	0.164934	1	0	0.341649	0	1
Q9UI09	NDUFA12	4	1	1	1	0	9.07368e-07	1.95731e-07	0.215713	1.74339e-06	1.94829e-07	0.111753	0	0	0.164934	1	0	0.341649	0	1
Q14974	KPNB1	20	19	20	20	18	0.000138918	0.000120371	0.866488	0.000110059	0.000109174	0.991959	0	1	0.16534	0.946695	0	1	0	1
Q9H9B4	SFXN1	7	3	1	2	0	4.97686e-06	2.14383e-06	0.43076	3.78764e-06	3.87203e-06	1.02228	0	0	0.165375	0.614695	0	0.273343	1	1
Q07955	SRSF1	8	4	3	6	1	1.03878e-05	4.80035e-06	0.462114	5.81115e-06	8.00342e-06	1.37725	0	0	0.16614	0.345527	0	0.300845	1	0.450576
Q96CX2,Q68DU8	KCTD12,KCTD16	8	4	8	1	0	4.64107e-06	2.09626e-06	0.451677	6.5418e-06	8.30327e-07	0.126926	0	0	0.16614	0.0101418	0	0.300845	0	0.019656
Q9H3U1	UNC45A	9	6	8	14	11	7.11088e-06	3.95471e-06	0.55615	7.1933e-06	1.2965e-05	1.80237	0	0	0.166257	0.0345509	0	0.514476	1	0.11097
P14866,Q8WVV9	HNRNPL,HNRNPLL	19	17	0	0	0	7.76694e-05	5.0209e-05	0.646445	NaN	NaN	NA	0	0	0.167524	NA	0	0.60499	0	1
P05156	CFI	10	8	10	6	4	8.24648e-05	2.23253e-05	0.270725	2.3753e-05	8.57099e-06	0.360838	0	0	0.168375	0.0843819	0	0.751186	0	0.333213
Q5VYY1	ANKRD22	13	18	16	15	18	1.86578e-05	2.59774e-05	1.3923	2.6457e-05	3.41942e-05	1.29245	0	0	0.169509	0.247618	1	0.127386	0	1
O00567	NOP56	5	2	1	0	0	3.72906e-06	4.932e-07	0.132258	2.5666e-06	NaN	NA	0	0	0.171244	NA	0	0.407484	0	1
P32456	GBP2	18	17	12	9	4	3.91545e-05	3.16163e-05	0.807476	2.11422e-05	1.49623e-05	0.7077	0	0	0.171527	0.557345	0	1	0	0.527254
P62829	RPL23	14	9	13	16	16	2.49148e-05	1.57981e-05	0.634083	2.39407e-05	2.51653e-05	1.05115	0	0	0.172183	0.485798	0	0.200287	1	0.480115
Q9NQW7	XPNPEP1	13	10	0	0	0	8.47768e-06	4.8495e-06	0.572031	NaN	NaN	NA	0	0	0.172183	NA	0	0.523107	0	1
P09601	HMOX1	7	11	8	9	14	2.30725e-05	4.63999e-05	2.01105	1.78976e-05	3.42994e-05	1.91642	0	0	0.172998	0.461546	1	0.340644	1	1
P02768	ALB	20	20	20	20	19	0.180894	0.105776	0.584742	0.144161	0.0758538	0.526173	0	1	0.173829	0.0244677	0	1	0	1
P15104	GLUL	20	20	20	20	18	0.00182109	0.00138941	0.762959	0.00137299	0.00131436	0.957298	0	1	0.173829	0.883057	0	1	0	1
O75368	SH3BGRL	12	9	7	4	2	1.50304e-05	7.84702e-06	0.522078	1.06376e-05	4.55918e-06	0.428591	0	0	0.173945	0.197343	0	0.527254	0	0.480115
Q9UN36	NDRG2	13	8	7	9	6	2.60327e-05	1.4389e-05	0.552726	2.26046e-05	2.2182e-05	0.981307	0	0	0.173945	0.625037	0	0.204927	1	0.747527
P02730	SLC4A1	5	10	5	3	5	4.49094e-06	1.56867e-05	3.49297	2.2051e-05	1.96447e-05	0.890878	0	0	0.175985	0.394365	1	0.190793	0	0.694765
P27169	PON1	9	6	6	1	1	3.00722e-05	1.22691e-05	0.407988	1.01516e-05	4.51073e-06	0.444338	0	0	0.175985	0.0575426	0	0.514476	0	0.0914761
P01042	KNG1	15	14	14	9	8	0.000242804	8.38696e-05	0.345421	0.00012767	5.63965e-05	0.441738	0	0	0.176051	0.0504241	0	1	0	0.200287
Q13636,Q9UL26	RAB31,RAB22A	8	4	0	0	0	2.68659e-06	1.55353e-06	0.578254	NaN	NaN	NA	0	0	0.176584	NA	0	0.300845	0	1
Q9BTV4	TMEM43	8	5	1	1	3	1.0993e-05	5.63855e-06	0.51292	3.62784e-06	9.63117e-07	0.265479	0	0	0.177399	1	0	0.500603	0	1
P30838	ALDH3A1	9	16	9	13	14	3.69495e-05	4.77707e-05	1.29287	4.13881e-05	3.02674e-05	0.731306	0	0	0.17772	0.17327	1	0.0483721	1	0.340644
P18054	ALOX12	14	17	17	16	19	0.000466875	0.000685295	1.46783	0.000551018	0.000732806	1.32991	0	1	0.178116	0.392925	1	0.450576	0	1
Q9NQR4	NIT2	16	16	17	12	6	2.00095e-05	1.64303e-05	0.821126	1.64817e-05	1.22094e-05	0.740782	0	0	0.178856	0.318436	0	1	0	0.155187
O95479	H6PD	4	1	0	0	0	7.56183e-06	1.40794e-06	0.18619	NaN	NaN	NA	0	0	0.179728	NA	0	0.341649	0	1
P00739	HPR	4	1	2	2	0	9.75519e-06	3.01656e-06	0.309226	2.36789e-06	4.12359e-06	1.74146	0	0	0.179728	1	0	0.341649	0	1
P02747	C1QC	4	1	4	4	2	1.0393e-05	3.48734e-06	0.335546	8.80521e-06	7.79368e-06	0.885122	0	0	0.179728	0.953691	0	0.341649	0	1
P07360	C8G	4	1	2	4	1	7.99721e-06	2.23509e-06	0.279484	3.61477e-06	7.60675e-06	2.10435	0	0	0.179728	0.395893	0	0.341649	1	0.66142
P31937	HIBADH	4	1	3	1	0	9.29473e-06	2.59877e-06	0.279596	6.50337e-06	4.20882e-06	0.647174	0	0	0.179728	0.323604	0	0.341649	0	0.60499
P32455,Q9H0R5	GBP1,GBP3	4	1	3	1	0	9.62543e-06	2.87226e-06	0.298403	5.23211e-06	1.76164e-06	0.336698	0	0	0.179728	0.323604	0	0.341649	0	0.60499
Q13098	GPS1	4	1	11	6	6	2.90272e-06	8.89961e-07	0.306596	7.70266e-06	4.14763e-06	0.538468	0	0	0.179728	0.144956	0	0.341649	0	0.200287
P0C0L5	C4B_2	18	16	18	16	15	0.000626928	0.000285257	0.455007	0.000391289	0.000233497	0.596738	0	1	0.179861	0.075948	0	0.66142	0	0.66142
P21128	ENDOU	10	16	10	14	15	3.25294e-05	7.46033e-05	2.29341	3.27553e-05	4.6381e-05	1.41598	0	0	0.179967	0.29447	1	0.0958456	1	0.333213
P07910,P0DMR1,O60812,B7ZW38,B2RXH8	HNRNPC,HNRNPCL4,HNRNPCL1,HNRNPCL3,HNRNPCL2	20	16	15	13	9	8.14643e-05	5.78807e-05	0.710505	5.759e-05	5.17986e-05	0.899437	0	0	0.180373	0.826367	0	0.106029	0	0.731094
Q9H1E1	RNASE7	7	10	5	7	9	1.59728e-05	7.3266e-05	4.58692	1.35778e-05	1.48527e-05	1.0939	0	0	0.181102	0.526103	1	0.523107	1	0.731094
Q8TF05	PPP4R1	13	17	13	17	10	1.08708e-05	1.46096e-05	1.34393	9.08609e-06	1.25305e-05	1.37909	0	0	0.181604	0.263679	1	0.273343	1	0.273343
Q92945	KHSRP	11	7	2	3	0	3.12199e-05	1.60722e-05	0.514806	7.35674e-06	5.13389e-06	0.697849	0	0	0.182529	0.72405	0	0.340644	1	1
O75882	ATRN	5	2	2	0	0	5.58941e-06	1.60717e-06	0.287539	1.81936e-06	NaN	NA	0	0	0.184385	NA	0	0.407484	0	0.487179
O95831	AIFM1	5	2	3	3	1	2.75781e-06	6.80246e-07	0.246662	4.43016e-06	2.4183e-06	0.545872	0	0	0.184385	1	0	0.407484	0	1
P62328	TMSB4X	19	19	18	18	12	0.000811451	0.000629105	0.775284	0.000824678	0.000589533	0.714865	0	1	0.185	0.310175	0	1	0	1
P80217	IFI35	10	5	3	1	0	9.94231e-06	6.93945e-06	0.697972	2.17615e-06	1.04875e-06	0.481932	0	0	0.18613	0.323604	0	0.190793	0	0.60499
Q9H0U4,Q92928	RAB1B,RAB1C	15	10	11	8	4	2.60197e-05	1.81503e-05	0.697559	3.48783e-05	1.84947e-05	0.530265	0	0	0.186829	0.147723	0	0.190793	0	0.527254
Q9UBX7	KLK11	8	14	9	9	8	2.48515e-05	4.30362e-05	1.73174	1.89402e-05	1.73674e-05	0.91696	0	0	0.187097	0.835731	1	0.11097	0	1
P11166	SLC2A1	4	8	8	8	8	2.67064e-06	5.54422e-06	2.07599	5.8559e-06	6.53295e-06	1.11562	0	0	0.18751	0.818799	1	0.300845	0	1
Q9UH99	SUN2	8	4	2	1	1	7.85939e-06	4.21009e-06	0.535676	1.85979e-06	1.12996e-06	0.607575	0	0	0.18751	0.614695	0	0.300845	0	1
Q96FX8	PERP	5	8	9	11	13	1.20361e-05	3.68213e-05	3.05923	4.83705e-05	8.25323e-05	1.70625	0	0	0.188072	0.297922	1	0.500603	1	0.752371
Q9Y624	F11R	7	3	6	6	3	8.0308e-06	4.1622e-06	0.51828	1.27792e-05	1.06992e-05	0.837238	0	0	0.188147	0.986689	0	0.273343	0	1
Q8NFU3	TSTD1	12	8	6	2	1	2.98784e-05	2.0808e-05	0.696422	1.27558e-05	6.74987e-06	0.529161	0	0	0.188314	0.126205	0	0.343067	0	0.235116
P01619	IGKV3-20	13	11	14	7	8	0.000326446	0.000220235	0.674643	0.000190087	4.72563e-05	0.248604	0	0	0.188862	0.0113022	0	0.747527	0	0.0561609
Q9HD42	CHMP1A	6	3	0	1	0	5.00864e-06	1.67622e-06	0.334665	NaN	1.01793e-06	NA	0	0	0.189108	NA	0	0.450576	1	1
P10606	COX5B	15	8	3	2	0	3.64883e-05	3.62501e-05	0.993471	1.22479e-05	5.75565e-06	0.469928	0	0	0.19056	0.689065	0	0.053551	0	1
Q02818	NUCB1	12	11	11	8	7	1.24797e-05	8.07057e-06	0.646695	1.20677e-05	8.93542e-06	0.740441	0	0	0.19056	0.438346	0	1	0	0.527254
O15020	SPTBN2	12	15	15	17	17	4.53586e-05	6.52083e-05	1.43762	4.97787e-05	7.25284e-05	1.45702	0	1	0.191079	0.201817	1	0.500603	1	0.694765
P11216	PYGB	20	20	20	20	18	0.000193788	0.000142642	0.736073	0.000118576	0.000150664	1.27062	0	1	0.191751	0.71795	0	1	0	1
P38919	EIF4A3	11	7	4	8	1	1.08239e-05	6.08047e-06	0.561765	6.70436e-06	1.10085e-05	1.64199	0	0	0.192443	0.176584	0	0.340644	1	0.300845
O15127	SCAMP2	13	7	8	6	6	2.74921e-05	1.74453e-05	0.634558	1.55137e-05	1.23212e-05	0.794215	0	0	0.193216	0.645191	0	0.112834	0	0.741054
O15400	STX7	13	16	6	8	12	1.96144e-05	2.63729e-05	1.34457	7.6966e-06	1.15979e-05	1.50688	0	0	0.194168	0.382515	1	0.480115	1	0.741054
Q16658	FSCN1	17	12	12	11	8	4.54861e-05	3.25125e-05	0.714779	2.24573e-05	1.71269e-05	0.762645	0	0	0.194168	0.490415	0	0.155187	0	1
Q08477,P78329,Q9HBI6,Q9HCS2,P98187	CYP4F3,CYP4F2,CYP4F11,CYP4F12,CYP4F8	6	10	0	0	0	1.57623e-05	2.73185e-05	1.73315	NaN	NaN	NA	0	0	0.194227	NA	1	0.333213	0	1
P02743	APCS	4	1	0	1	0	4.28557e-06	2.11062e-06	0.492493	NaN	2.4937e-06	NA	0	0	0.195486	NA	0	0.341649	1	1
P41226	UBA7	4	1	1	1	0	2.5373e-06	1.13641e-06	0.447881	1.67953e-06	2.24485e-06	1.33659	0	0	0.195486	1	0	0.341649	0	1
P63220	RPS21	4	1	8	4	4	3.33303e-06	1.32247e-06	0.396778	1.67938e-05	7.16394e-06	0.426581	0	0	0.195486	0.18751	0	0.341649	0	0.300845
Q12768	WASHC5	1	4	5	5	3	2.20158e-07	5.25687e-07	2.38778	1.21074e-05	9.42369e-06	0.778343	0	0	0.195486	0.80337	1	0.341649	0	1
Q8IZ83	ALDH16A1	4	1	2	1	0	7.2271e-06	2.40278e-06	0.332468	3.19269e-06	1.16004e-06	0.363343	0	0	0.195486	0.534056	0	0.341649	0	1
Q9H190	SDCBP2	1	4	0	0	0	2.09779e-06	5.78962e-06	2.75986	NaN	NaN	NA	0	0	0.195486	NA	1	0.341649	0	1
Q14210	LY6D	12	13	13	16	15	0.000130211	0.000240745	1.84888	0.000115628	0.000226863	1.962	0	0	0.196278	0.0318978	1	1	1	0.480115
Q9NQ38	SPINK5	14	18	17	16	19	0.000669322	0.000814471	1.21686	0.000635723	0.000610584	0.960455	0	1	0.19706	0.472315	1	0.235116	0	1
P19404	NDUFV2	5	2	2	2	0	3.69429e-06	1.27735e-06	0.345764	2.62845e-06	2.2589e-06	0.859404	0	0	0.198257	1	0	0.407484	0	1
Q7Z3J2	VPS35L	5	2	2	0	0	2.98378e-07	9.3414e-08	0.313073	5.8109e-06	NaN	NA	0	0	0.198257	NA	0	0.407484	0	0.487179
O00410	IPO5	19	16	0	0	0	1.78583e-05	1.40371e-05	0.786026	NaN	NaN	NA	0	0	0.198413	NA	0	0.341649	0	1
P35232	PHB	18	17	16	11	6	6.11473e-05	4.80753e-05	0.786222	5.42109e-05	4.09438e-05	0.755268	0	0	0.198413	0.572588	0	1	0	0.175996
P48729,Q8N752	CSNK1A1,CSNK1A1L	10	16	0	0	0	2.02696e-05	2.89823e-05	1.42985	NaN	NaN	NA	0	0	0.198595	NA	1	0.0958456	0	1
Q00325	SLC25A3	20	18	20	19	16	0.00318003	0.00231907	0.729261	0.00184301	0.00180305	0.978317	0	1	0.198813	0.698028	0	0.487179	0	1
P49257	LMAN1	4	8	11	8	8	7.48045e-06	1.52442e-05	2.03788	1.67886e-05	1.64296e-05	0.978618	0	0	0.198927	0.826388	1	0.300845	0	0.527254
Q9UL52	TMPRSS11E	13	17	16	16	17	0.000120797	0.000173281	1.43449	0.000160488	0.000193134	1.20342	0	1	0.200085	0.259731	1	0.273343	0	1
O43776	NARS1	20	20	17	19	19	7.89706e-05	6.98119e-05	0.884024	4.23837e-05	4.85164e-05	1.1447	0	1	0.201194	0.129642	0	1	1	0.60499
P06744,Q8N196	GPI,SIX5	20	20	20	20	19	0.00123579	0.00108054	0.874371	0.0010092	0.000890817	0.882699	0	1	0.201194	0.210964	0	1	0	1
P62277	RPS13	17	15	11	11	7	5.94763e-05	4.29523e-05	0.722176	4.67598e-05	3.95022e-05	0.84479	0	0	0.201817	0.977367	0	0.694765	0	1
P30084	ECHS1	16	12	10	12	3	3.27297e-05	1.99095e-05	0.6083	3.79145e-05	2.6928e-05	0.71023	0	0	0.202292	0.523259	0	0.300845	1	0.751186
Q9ULC6	PADI1	11	7	9	8	3	3.29562e-05	1.79002e-05	0.543152	1.63781e-05	1.44321e-05	0.88118	0	0	0.202747	0.916228	0	0.340644	0	1
P02760	AMBP	12	9	14	9	8	6.48365e-05	3.57531e-05	0.551435	4.37666e-05	2.54588e-05	0.581695	0	0	0.202747	0.147151	0	0.527254	0	0.200287
Q01581,P54868	HMGCS1,HMGCS2	7	12	7	12	11	7.85509e-06	1.27511e-05	1.6233	6.61529e-06	1.13166e-05	1.71068	0	0	0.203319	0.147723	1	0.204927	1	0.204927
P31942	HNRNPH3	9	5	5	3	4	2.33539e-06	1.50548e-06	0.644638	2.99283e-06	1.25592e-06	0.419642	0	0	0.204008	0.394365	0	0.320266	0	0.694765
P04217	A1BG	17	14	18	11	8	0.00037883	0.000204588	0.540054	0.000180911	8.10106e-05	0.447792	0	0	0.205882	0.0241319	0	0.450576	0	0.0309503
P12081,P49590	HARS1,HARS2	14	8	0	0	0	1.47399e-05	9.54838e-06	0.647789	NaN	NaN	NA	0	0	0.206778	NA	0	0.11097	0	1
P30040	ERP29	15	13	11	7	1	1.83712e-05	1.3063e-05	0.71106	2.1275e-05	1.25109e-05	0.588058	0	0	0.207187	0.202747	0	0.731094	0	0.340644
Q01432,P23109	AMPD3,AMPD1	12	8	13	10	8	1.17568e-05	7.11517e-06	0.605199	1.7459e-05	9.96176e-06	0.570581	0	0	0.208481	0.220772	0	0.343067	0	0.523107
Q15125	EBP	9	4	10	6	9	1.0248e-05	7.49274e-06	0.73114	2.57978e-05	1.8272e-05	0.708278	0	0	0.210824	0.335961	0	0.175996	0	0.333213
Q6P9B6	MEAK7	4	8	10	11	13	2.23871e-06	4.82777e-06	2.1565	6.18151e-06	6.41179e-06	1.03725	0	0	0.210844	0.965753	1	0.300845	1	1
O95336	PGLS	20	19	20	20	17	7.23599e-05	6.19187e-05	0.855705	5.34014e-05	6.34415e-05	1.18801	0	1	0.210964	0.583114	0	1	0	1
P06737	PYGL	20	19	20	20	19	0.000585742	0.000478649	0.817167	0.000540915	0.000378164	0.699118	0	1	0.210964	0.0490903	0	1	0	1
P26038	MSN	20	20	19	19	18	0.00112934	0.00100106	0.886414	0.000435871	0.000347534	0.797334	0	1	0.210964	0.551757	0	1	0	1
P46783,Q9NQ39	RPS10,RPS10P5	14	14	16	13	14	2.35289e-05	1.63184e-05	0.693549	2.2605e-05	1.75734e-05	0.777412	0	0	0.212167	0.485798	0	1	0	0.480115
P0DN76,Q01081,Q8WU68	U2AF1L5,U2AF1,U2AF1L4	12	9	0	0	0	3.87612e-06	3.11728e-06	0.804228	NaN	NaN	NA	0	0	0.21308	NA	0	0.527254	0	1
P02792	FTL	7	3	11	3	0	3.29362e-05	8.59373e-06	0.26092	2.61045e-05	8.73918e-06	0.334776	0	0	0.213153	0.0222317	0	0.273343	0	0.0187011
Q9UBQ0	VPS29	11	7	1	0	1	1.27398e-05	8.02711e-06	0.63008	6.65641e-07	NaN	NA	0	0	0.213447	NA	0	0.340644	0	1
Q15233	NONO	16	13	10	7	2	3.03921e-05	1.78852e-05	0.588483	1.84178e-05	1.39067e-05	0.755067	0	0	0.213618	0.425794	0	0.480115	0	0.523107
P43304	GPD2	16	14	13	12	6	3.86669e-05	2.6065e-05	0.674092	2.84264e-05	2.74487e-05	0.965606	0	0	0.214821	0.64657	0	0.716427	0	1
Q9UMR2	DDX19B	6	3	1	0	0	4.46042e-07	1.58841e-07	0.356113	3.77147e-07	NaN	NA	0	0	0.215257	NA	0	0.450576	0	1
Q9BZF1	OSBPL8	5	9	5	1	0	2.26743e-06	3.87743e-06	1.71006	1.66858e-06	3.67816e-07	0.220436	0	0	0.215546	0.098042	1	0.320266	0	0.181764
P36542	ATP5F1C	14	11	5	4	0	3.11441e-05	2.14665e-05	0.689263	1.66652e-05	1.21398e-05	0.728449	0	0	0.216217	0.809982	0	0.514476	0	1
P30043	BLVRB	18	15	13	13	17	4.66287e-05	3.55185e-05	0.76173	3.26514e-05	4.0393e-05	1.2371	0	0	0.217194	0.955905	0	0.407484	0	1
P02766,Q5U7I5	TTR	15	13	17	8	6	0.000240254	9.77065e-05	0.40668	9.87926e-05	3.30761e-05	0.334803	0	0	0.217233	0.00402428	0	0.731094	0	0.00791169
P02647	APOA1	18	19	18	16	13	0.0036207	0.00126408	0.349126	0.00216291	0.000957143	0.442525	0	1	0.218319	0.0236727	1	1	0	0.66142
P0DOX8,B9A064,P0CG04	IGLL5,IGLC1	18	19	20	20	19	0.000187105	0.000160537	0.858	0.00291727	0.00168342	0.577054	0	1	0.218319	0.00614496	1	1	0	1
P15880	RPS2	20	18	20	19	17	0.000100115	8.08701e-05	0.807776	0.000113156	0.00012136	1.07251	0	1	0.218384	0.221065	0	0.487179	0	1
Q9ULZ3	PYCARD	12	8	16	13	12	1.25226e-05	8.16238e-06	0.651812	1.95587e-05	1.48615e-05	0.759841	0	0	0.219132	0.359837	0	0.343067	0	0.480115
P04406,O14556	GAPDH,GAPDHS	20	20	0	0	0	0.00432077	0.00386458	0.89442	NaN	NaN	NA	0	0	0.221065	NA	0	1	0	1
P60900	PSMA6	20	19	20	19	14	0.000126027	0.000103136	0.818365	8.40686e-05	8.5062e-05	1.01182	0	1	0.221065	0.658798	0	1	0	1
Q13442	PDAP1	16	12	11	7	4	3.37967e-06	2.37011e-06	0.701285	4.495e-06	2.88948e-06	0.642822	0	0	0.222386	0.247978	0	0.300845	0	0.340644
A0A0C4DH38	IGHV5-51	19	15	12	5	7	5.22892e-05	3.27935e-05	0.627157	2.96337e-05	6.14287e-06	0.207293	0	0	0.222747	0.0143119	0	0.181764	0	0.053551
O14737	PDCD5	8	5	4	3	1	2.67976e-06	1.18812e-06	0.443369	3.26082e-06	2.10174e-06	0.644544	0	0	0.22292	0.668037	0	0.500603	0	1
P17980	PSMC3	19	17	13	14	13	1.49661e-05	1.23564e-05	0.825624	1.30891e-05	1.20218e-05	0.918462	0	0	0.22329	0.649723	0	0.60499	1	1
P26583	HMGB2	12	9	12	7	3	0.000146488	0.00010178	0.694802	0.000130595	6.68239e-05	0.511686	0	0	0.223788	0.147723	0	0.527254	0	0.204927
P29144	TPP2	7	12	10	14	10	8.16818e-06	1.31561e-05	1.61066	8.14126e-06	1.37056e-05	1.68348	0	0	0.224877	0.0962306	1	0.204927	1	0.333213
P50402	EMD	7	12	2	9	2	9.91065e-06	1.3769e-05	1.38932	3.27639e-06	1.26157e-05	3.8505	0	0	0.224877	0.0153667	1	0.204927	1	0.0309503
P08174	CD55	15	10	12	7	7	2.532e-05	1.96294e-05	0.775256	3.35285e-05	2.2998e-05	0.685923	0	0	0.226717	0.341879	0	0.190793	0	0.204927
Q9Y2J8	PADI2	6	10	11	7	5	1.46838e-05	2.45867e-05	1.67441	2.72387e-05	1.04511e-05	0.383686	0	0	0.22761	0.0755113	1	0.333213	0	0.340644
P58107	EPPK1	18	17	13	15	13	8.65572e-05	5.18708e-05	0.599266	7.81387e-05	9.709e-05	1.24253	0	0	0.228257	0.621612	0	1	1	0.731094
P05026	ATP1B1	5	2	3	3	0	1.38456e-05	5.93391e-06	0.428576	4.78726e-06	5.73355e-06	1.19767	0	0	0.228262	0.930612	0	0.407484	0	1
P10412,Q02539	H1-4,H1-1	2	5	0	0	0	3.28319e-06	1.50813e-05	4.59348	NaN	NaN	NA	0	0	0.228262	NA	1	0.407484	0	1
P12236	SLC25A6	5	2	18	20	16	1.15006e-05	5.07189e-06	0.44101	0.000286548	0.000298153	1.0405	0	1	0.228262	0.297654	0	0.407484	1	0.487179
P53582	METAP1	5	2	3	4	3	7.69472e-06	2.26389e-06	0.294213	3.76936e-06	6.41914e-06	1.70298	0	0	0.228262	0.668037	0	0.407484	1	1
P61513,A6NKH3	RPL37A,RPL37AP8	2	5	1	2	0	1.83678e-06	4.47008e-06	2.43365	4.64117e-07	1.47565e-06	3.17949	0	0	0.228262	0.534056	1	0.407484	1	1
Q99729	HNRNPAB	5	2	3	4	0	6.23392e-06	1.85187e-06	0.297064	2.96536e-06	3.58733e-06	1.20974	0	0	0.228262	0.728472	0	0.407484	1	1
Q9P107	GMIP	2	5	1	1	1	1.40884e-05	3.88458e-05	2.75729	1.89008e-07	1.16848e-07	0.618219	0	0	0.228262	1	1	0.407484	0	1
P43243	MATR3	6	3	4	2	0	8.13469e-06	1.59709e-06	0.196331	1.44295e-05	2.27722e-06	0.157817	0	0	0.229268	0.372116	0	0.450576	0	0.66142
Q9P2M7	CGN	6	3	4	7	7	2.65244e-06	1.07387e-06	0.40486	2.41059e-06	4.52961e-06	1.87904	0	0	0.229268	0.263878	0	0.450576	1	0.480115
Q8IZV5	RDH10	9	6	7	3	1	2.42961e-05	1.15547e-05	0.475578	1.38096e-05	3.22606e-06	0.233611	0	0	0.231042	0.109457	0	0.514476	0	0.273343
Q92621	NUP205	9	6	0	4	7	2.46281e-06	1.29593e-06	0.526201	NaN	1.71423e-06	NA	0	0	0.231042	NA	0	0.514476	1	0.106029
P62701,Q8TD47,P22090	RPS4X,RPS4Y2,RPS4Y1	20	19	19	19	19	0.000167204	0.000145332	0.869188	0.000109653	0.000120524	1.09914	0	1	0.231499	0.372021	0	1	0	1
P23142	FBLN1	11	10	15	6	8	0.000143463	5.1179e-05	0.35674	9.34758e-05	1.54292e-05	0.165061	0	0	0.234876	0.00810388	0	1	0	0.0103867
Q14624	ITIH4	9	8	11	4	3	6.58642e-05	2.62066e-05	0.397889	2.4789e-05	2.19201e-05	0.884268	0	0	0.235187	0.0415889	0	1	0	0.0483721
Q9P265,Q14689	DIP2B,DIP2A	7	10	3	1	1	2.26049e-06	3.81184e-06	1.68629	1.16222e-06	5.69725e-07	0.490203	0	0	0.235187	0.349723	1	0.523107	0	0.60499
P08697	SERPINF2	11	9	11	7	4	8.19833e-05	3.79202e-05	0.462536	4.39847e-05	2.55408e-05	0.580675	0	0	0.235832	0.236058	0	0.752371	0	0.340644
P62942	FKBP1A	8	4	1	0	0	1.90142e-05	1.0235e-05	0.538279	3.27176e-06	NaN	NA	0	0	0.236209	NA	0	0.300845	0	1
Q86VR7	VSIG10L	4	8	2	9	6	5.75249e-06	9.26645e-06	1.61086	1.13644e-06	9.38523e-06	8.25842	0	0	0.236209	0.00696234	1	0.300845	1	0.0309503
P07954	FH	12	7	6	11	2	1.12321e-05	7.68074e-06	0.683821	9.64607e-06	1.24712e-05	1.29288	0	0	0.236248	0.247252	0	0.204927	1	0.200287
Q9Y678	COPG1	20	16	18	16	14	4.66265e-05	3.74852e-05	0.803945	3.02969e-05	2.67419e-05	0.88266	0	1	0.239103	0.967581	0	0.106029	0	0.66142
P46459	NSF	19	18	18	19	14	6.65491e-05	5.31602e-05	0.798812	4.71167e-05	5.24894e-05	1.11403	0	1	0.239236	0.839202	0	1	1	1
O15269	SPTLC1	3	7	4	1	2	3.3118e-06	5.96418e-06	1.80089	2.52719e-06	7.15953e-07	0.283299	0	0	0.240474	0.164934	1	0.273343	0	0.341649
Q5JTV8,Q8NFQ8	TOR1AIP1,TOR1AIP2	12	8	0	0	0	1.6212e-05	1.08669e-05	0.670297	NaN	NaN	NA	0	0	0.241594	NA	0	0.343067	0	1
P01024	C3	20	20	20	20	19	0.00393555	0.00226048	0.574374	0.00330436	0.0018256	0.552481	0	1	0.24227	0.0263291	0	1	0	1
P07741	APRT	20	19	18	20	17	8.01497e-05	6.55632e-05	0.81801	6.09294e-05	8.53914e-05	1.40148	0	1	0.24227	0.053092	0	1	1	0.487179
P40926	MDH2	20	19	20	20	19	0.000478	0.000357615	0.748148	0.000295853	0.000324639	1.0973	0	1	0.24227	0.354652	0	1	0	1
P25311	AZGP1	14	14	17	10	7	0.000140032	5.42981e-05	0.387754	0.00017251	3.10497e-05	0.179987	0	0	0.24387	0.00308799	0	1	0	0.0407424
O95394	PGM3	6	3	1	0	0	2.92829e-06	1.2203e-06	0.416728	1.70742e-06	NaN	NA	0	0	0.243916	NA	0	0.450576	0	1
Q12769	NUP160	6	3	0	0	1	1.22237e-06	5.02186e-07	0.41083	NaN	NaN	NA	0	0	0.243916	NA	0	0.450576	0	1
Q15942	ZYX	15	11	12	8	4	4.56168e-05	3.79027e-05	0.830894	4.72606e-05	2.96693e-05	0.627781	0	0	0.245579	0.230168	0	0.320266	0	0.343067
Q00341	HDLBP	7	11	3	5	1	6.63122e-06	1.00693e-05	1.51847	3.26539e-06	5.99108e-06	1.83472	0	0	0.247978	0.394365	1	0.340644	1	0.694765
P22234	PAICS	11	8	9	3	1	1.10289e-05	6.29483e-06	0.570757	8.12863e-06	2.25478e-06	0.277388	0	0	0.24802	0.0355448	0	0.527254	0	0.0823588
Q9BRF8	CPPED1	7	4	7	2	0	1.42084e-05	6.80508e-06	0.478947	1.11685e-05	2.70037e-06	0.241783	0	0	0.249465	0.0617475	0	0.480115	0	0.127386
Q9UIA9,Q9H2T7	XPO7,RANBP17	14	12	8	8	9	9.94062e-06	7.63671e-06	0.768232	7.07042e-06	5.83097e-06	0.824698	0	0	0.251245	0.963455	0	0.741054	0	1
P61163	ACTR1A	10	6	6	5	7	5.70087e-06	4.08304e-06	0.716213	9.60431e-06	9.35085e-06	0.97361	0	0	0.252024	0.904228	0	0.333213	0	1
P61604	HSPE1	16	11	8	5	2	6.43401e-05	3.69975e-05	0.57503	2.8521e-05	1.30328e-05	0.456954	0	0	0.25335	0.407226	0	0.175996	0	0.500603
Q9Y371	SH3GLB1	10	8	4	0	0	3.98531e-06	2.59106e-06	0.650154	2.05264e-06	NaN	NA	0	0	0.254093	NA	0	0.751186	0	0.106029
P28062	PSMB8	13	10	5	3	2	3.12074e-05	2.20449e-05	0.706398	1.30543e-05	9.75536e-06	0.747294	0	0	0.254274	0.485885	0	0.523107	0	0.694765
P48444	ARCN1	15	11	14	15	7	1.74344e-05	1.25628e-05	0.720578	1.63951e-05	1.74757e-05	1.06591	0	0	0.257001	0.795119	0	0.320266	1	1
Q9Y262	EIF3L	14	10	16	16	15	2.65256e-05	1.82851e-05	0.68934	2.3352e-05	2.25958e-05	0.967617	0	1	0.257535	0.754806	0	0.333213	0	1
O95486	SEC24A	3	6	1	1	2	3.82887e-07	7.52201e-07	1.96455	1.6825e-07	8.37406e-08	0.497714	0	0	0.25921	1	1	0.450576	0	1
Q8TCT9	HM13	3	6	2	4	2	6.00104e-06	1.32508e-05	2.20808	2.33645e-06	6.04561e-06	2.58752	0	0	0.25921	0.349245	1	0.450576	1	0.66142
Q9NZB2	FAM120A	6	3	4	1	0	6.01989e-06	1.68172e-06	0.27936	4.23581e-06	2.71018e-06	0.639827	0	0	0.25921	0.195486	0	0.450576	0	0.341649
Q53FA7	TP53I3	18	14	15	13	14	5.35264e-05	3.99247e-05	0.745887	4.46605e-05	3.95144e-05	0.884772	0	0	0.259731	0.546343	0	0.235116	0	0.731094
Q13148	TARDBP	11	7	6	4	5	7.38651e-06	4.34664e-06	0.588457	4.6322e-06	1.80873e-06	0.390469	0	0	0.260313	0.345886	0	0.340644	0	0.716427
P55084	HADHB	19	18	17	18	12	0.000105938	7.82631e-05	0.738761	8.05569e-05	0.000108493	1.34679	0	1	0.261527	0.0178311	0	1	1	1
P61313	RPL15	20	17	17	16	12	8.35438e-05	7.03831e-05	0.842469	6.89028e-05	7.97842e-05	1.15792	0	1	0.261527	0.139376	0	0.230769	0	1
P00748	F12	8	5	3	3	1	5.90079e-05	2.23708e-05	0.379116	8.49153e-06	1.00174e-05	1.1797	0	0	0.262162	1	0	0.500603	0	1
Q9UMX0,Q9NRR5	UBQLN1,UBQLN4	6	4	0	0	0	3.39997e-06	1.76949e-06	0.520444	NaN	NaN	NA	0	0	0.262523	NA	0	0.716427	0	1
P04196	HRG	14	12	13	7	6	0.00014236	5.45392e-05	0.383108	0.00010785	2.78297e-05	0.258041	0	0	0.262848	0.0492819	0	0.741054	0	0.112834
P12429	ANXA3	20	19	20	18	19	0.000992838	0.000713969	0.71912	0.000850613	0.000841907	0.989765	0	1	0.264832	0.250275	0	1	0	0.487179
Q96QK1	VPS35	20	19	20	20	19	0.000103995	9.11638e-05	0.876617	0.0001031	0.000112761	1.09371	0	1	0.264832	0.601662	0	1	0	1
P49720	PSMB3	15	12	16	14	8	2.08992e-05	1.71898e-05	0.822511	2.17006e-05	1.95306e-05	0.900002	0	0	0.264968	0.614019	0	0.500603	0	0.716427
Q99623	PHB2	19	13	7	8	3	4.58709e-05	3.51618e-05	0.766537	3.12214e-05	3.09216e-05	0.990398	0	0	0.265516	0.564948	0	0.043596	1	1
P27708	CAD	12	8	12	11	10	4.69484e-06	2.99481e-06	0.637895	4.95958e-06	3.49324e-06	0.704342	0	0	0.265629	0.266189	0	0.343067	0	1
P0DOX2,A0A0J9YVY3	IGHV7-4-1	19	19	0	0	0	0.000564454	0.000345399	0.611916	NaN	NaN	NA	0	0	0.267385	NA	0	1	0	1
P25774	CTSS	9	6	1	2	0	1.92681e-05	1.16634e-05	0.605325	1.01134e-06	2.81076e-06	2.77925	0	0	0.26944	0.534056	0	0.514476	1	1
P52566	ARHGDIB	18	12	13	12	4	0.000108167	8.22915e-05	0.760785	0.000133964	0.000103665	0.773827	0	0	0.269547	0.366435	0	0.0648332	0	1
Q9P260	RELCH	7	3	1	0	2	6.99595e-07	5.92621e-07	0.847092	2.78964e-07	NaN	NA	0	0	0.270174	NA	0	0.273343	0	1
P05783,Q92764	KRT18,KRT35	16	15	0	0	0	0.000122158	0.000101024	0.826998	NaN	NaN	NA	0	0	0.270572	NA	0	1	0	1
O60234	GMFG	11	6	11	8	3	5.15771e-05	3.93951e-05	0.76381	5.04327e-05	2.06417e-05	0.409293	0	0	0.272667	0.0871133	0	0.200287	0	0.527254
Q8N3Y7	SDR16C5	9	10	12	15	16	1.20151e-05	2.28415e-05	1.90107	4.23332e-05	5.93994e-05	1.40314	0	0	0.27278	0.148454	1	1	1	0.500603
P13804	ETFA	19	16	14	12	4	3.58771e-05	2.64748e-05	0.737929	2.51276e-05	2.10568e-05	0.837992	0	0	0.272835	0.668272	0	0.341649	0	0.741054
O00231	PSMD11	19	18	20	19	18	3.98853e-05	3.54354e-05	0.888434	4.09579e-05	4.12458e-05	1.00703	0	1	0.273195	0.883057	0	1	0	1
A0A0J9YX35	IGHV3-64D	3	1	1	0	0	1.09735e-05	1.96472e-06	0.179042	4.83489e-06	NaN	NA	0	0	0.275281	NA	0	0.60499	0	1
O60826	CCDC22	3	1	1	1	3	2.16104e-07	3.96561e-08	0.183504	7.03351e-08	4.86386e-08	0.691527	0	0	0.275281	1	0	0.60499	0	1
P04279	SEMG1	1	3	4	3	1	4.00347e-07	9.45681e-05	236.215	0.00427176	0.000103417	0.0242095	0	0	0.275281	0.609681	1	0.60499	0	1
P08473	MME	3	1	0	1	0	1.97836e-06	3.84619e-07	0.194413	NaN	1.04067e-06	NA	0	0	0.275281	NA	0	0.60499	1	1
P25098,P35626	GRK2,GRK3	1	3	7	8	0	6.21994e-07	2.59073e-06	4.16519	5.71327e-06	5.42891e-06	0.950227	0	0	0.275281	0.93801	1	0.60499	1	1
P42768	WAS	1	3	1	1	0	6.23873e-07	2.93125e-06	4.69847	1.67998e-06	7.66365e-07	0.456174	0	0	0.275281	1	1	0.60499	0	1
P55058	PLTP	3	1	2	0	0	4.42757e-06	7.32034e-07	0.165335	1.39785e-06	NaN	NA	0	0	0.275281	NA	0	0.60499	0	0.487179
P55735	SEC13	3	1	0	0	0	3.55636e-06	9.21386e-07	0.259082	NaN	NaN	NA	0	0	0.275281	NA	0	0.60499	0	1
P61923	COPZ1	3	1	4	2	1	1.01565e-06	1.6537e-07	0.162822	1.77733e-06	5.17886e-07	0.291385	0	0	0.275281	0.306247	0	0.60499	0	0.66142
Q05DH4	FAM160A1	3	1	0	1	0	3.17405e-07	5.89224e-08	0.185638	NaN	1.61374e-08	NA	0	0	0.275281	NA	0	0.60499	1	1
Q14165	MLEC	3	1	0	0	0	1.52331e-06	3.7775e-07	0.247979	NaN	NaN	NA	0	0	0.275281	NA	0	0.60499	0	1
Q14738	PPP2R5D	3	1	2	0	1	5.58494e-07	8.44702e-08	0.151246	7.07851e-07	NaN	NA	0	0	0.275281	NA	0	0.60499	0	0.487179
Q5T2E6	ARMH3	3	1	0	0	0	1.73062e-07	4.20925e-08	0.243223	NaN	NaN	NA	0	0	0.275281	NA	0	0.60499	0	1
Q8WYA6	CTNNBL1	3	1	2	0	0	6.88394e-07	9.62221e-08	0.139778	4.17046e-07	NaN	NA	0	0	0.275281	NA	0	0.60499	0	0.487179
Q96K19	RNF170	3	1	0	0	0	9.49059e-07	2.55462e-07	0.269174	NaN	NaN	NA	0	0	0.275281	NA	0	0.60499	0	1
P22314	UBA1	20	20	20	20	19	0.000546591	0.000483722	0.884979	0.00045314	0.000470128	1.03749	0	1	0.276627	0.444964	0	1	0	1
Q7Z2K6	ERMP1	15	12	13	15	14	6.0256e-05	3.91541e-05	0.649796	3.70727e-05	6.86003e-05	1.85043	0	0	0.276948	0.0584897	0	0.500603	1	0.731094
P06748	NPM1	8	4	6	6	3	2.83702e-05	1.82554e-05	0.643471	2.44083e-05	1.99722e-05	0.818254	0	0	0.278181	0.828299	0	0.300845	0	1
Q8N1F7	NUP93	2	5	2	0	0	1.10813e-06	1.15469e-06	1.04201	9.27261e-07	NaN	NA	0	0	0.27911	NA	1	0.407484	0	0.487179
Q99497	PARK7	16	13	15	15	13	6.05307e-05	4.02534e-05	0.665008	6.66035e-05	7.47265e-05	1.12196	0	0	0.280286	0.891577	0	0.480115	0	1
P62318	SNRPD3	9	6	8	5	6	1.91222e-05	1.0122e-05	0.529332	1.49696e-05	6.67648e-06	0.446002	0	0	0.283161	0.354296	0	0.514476	0	0.500603
Q06210,O94808	GFPT1,GFPT2	15	13	5	12	5	1.60842e-05	1.18803e-05	0.738634	9.58496e-06	1.39218e-05	1.45246	0	0	0.284891	0.0603366	0	0.731094	1	0.053551
O14818,Q8TAA3	PSMA7,PSMA8	20	17	18	14	15	5.39282e-05	4.14533e-05	0.768675	4.75203e-05	3.35143e-05	0.705262	0	0	0.285214	0.7139	0	0.230769	0	0.235116
P01116	KRAS	6	11	4	6	3	7.79523e-06	1.18143e-05	1.51558	3.03627e-06	3.62827e-06	1.19498	0	0	0.286022	0.581407	1	0.200287	1	0.716427
Q6ZUI0	TPRG1	11	16	14	14	17	6.27386e-05	7.84839e-05	1.25097	5.16462e-05	6.83198e-05	1.32284	0	0	0.289291	0.372841	1	0.175996	0	1
P27695	APEX1	8	5	5	1	2	1.34892e-05	6.40188e-06	0.474594	7.91011e-06	2.56399e-06	0.324141	0	0	0.290834	0.107205	0	0.500603	0	0.181764
O14639	ABLIM1	8	12	7	10	10	3.41348e-05	6.07539e-05	1.77982	1.04334e-05	2.08615e-05	1.99949	0	0	0.291262	0.191106	1	0.343067	1	0.523107
A0A075B6P5,P01615,A0A0A0MRZ7	IGKV2-28,IGKV2D-28,IGKV2D-26	6	3	0	0	0	2.08181e-05	1.15935e-05	0.556896	NaN	NaN	NA	0	0	0.291756	NA	0	0.450576	0	1
Q9Y3I0	RTCB	6	3	6	6	1	1.19213e-05	4.99828e-06	0.419273	7.96096e-06	8.41286e-06	1.05676	0	0	0.291756	0.960083	0	0.450576	0	1
P08708	RPS17	8	4	5	8	7	1.08317e-05	7.87551e-06	0.727083	8.84708e-06	1.34138e-05	1.51619	0	0	0.293236	0.262162	0	0.300845	1	0.500603
O00159	MYO1C	15	11	8	12	6	1.78104e-05	1.20765e-05	0.678062	1.00954e-05	1.37397e-05	1.36098	0	0	0.293457	0.291262	0	0.320266	1	0.343067
P23490	LORICRIN	3	5	4	6	6	6.58056e-06	2.85734e-05	4.34209	8.37809e-06	3.71849e-05	4.43835	0	0	0.295883	0.327991	1	0.694765	1	0.716427
P24539	ATP5PB	18	15	10	8	1	4.20479e-05	3.08184e-05	0.732934	2.77614e-05	3.08811e-05	1.11238	0	0	0.296405	0.917424	0	0.407484	0	0.751186
P23743	DGKA	9	6	7	3	3	4.07961e-06	2.46549e-06	0.604344	3.96026e-06	1.22654e-06	0.309712	0	0	0.297348	0.109457	0	0.514476	0	0.273343
Q5T749	KPRP	6	9	7	10	9	2.66866e-05	9.3863e-05	3.51723	2.24399e-05	5.38888e-05	2.40148	0	0	0.297348	0.212321	1	0.514476	1	0.523107
P00747	PLG	18	19	0	0	0	0.00035446	0.000169426	0.477983	NaN	NaN	NA	0	0	0.297586	NA	1	1	0	1
P01594,P01593	IGKV1-33,IGKV1D-33	5	2	0	0	0	5.70929e-06	5.54869e-06	0.97187	NaN	NaN	NA	0	0	0.297654	NA	0	0.407484	0	1
Q9UJC5	SH3BGRL2	2	5	4	5	5	6.28153e-06	7.84656e-06	1.24915	4.83396e-06	6.59355e-06	1.364	0	0	0.297654	0.697707	1	0.407484	1	1
O60635	TSPAN1	3	1	4	1	0	4.1844e-06	1.14582e-06	0.27383	5.22055e-06	1.69246e-06	0.324193	0	0	0.29879	0.179728	0	0.60499	0	0.341649
P04211,A0A075B6I9	IGLV7-43,IGLV7-46	3	1	0	0	0	2.32336e-05	2.47132e-06	0.106368	NaN	NaN	NA	0	0	0.29879	NA	0	0.60499	0	1
P08195	SLC3A2	3	1	1	0	0	4.92946e-07	1.43097e-07	0.290289	2.0228e-07	NaN	NA	0	0	0.29879	NA	0	0.60499	0	1
P08236	GUSB	3	1	3	2	0	1.67077e-06	5.44176e-07	0.325705	2.33819e-06	1.82432e-06	0.780229	0	0	0.29879	0.689065	0	0.60499	0	1
P17936	IGFBP3	3	1	0	0	1	6.53756e-06	8.56713e-07	0.131045	NaN	NaN	NA	0	0	0.29879	NA	0	0.60499	0	1
P22792	CPN2	3	1	0	1	0	1.78697e-06	4.75049e-07	0.26584	NaN	1.37188e-06	NA	0	0	0.29879	NA	0	0.60499	1	1
P61970	NUTF2	1	3	0	1	0	1.09066e-06	3.58199e-06	3.28423	NaN	1.61013e-07	NA	0	0	0.29879	NA	1	0.60499	1	1
P69892	HBG2	1	3	0	0	1	3.30264e-06	3.53677e-05	10.7089	NaN	NaN	NA	0	0	0.29879	NA	1	0.60499	0	1
Q13555	CAMK2G	3	1	3	0	0	1.1275e-06	4.17814e-07	0.370566	1.50749e-06	NaN	NA	0	0	0.29879	NA	0	0.60499	0	0.230769
Q15172	PPP2R5A	1	3	6	3	4	3.25492e-07	9.54454e-07	2.93234	3.19195e-06	2.21047e-06	0.692513	0	0	0.29879	0.405226	1	0.60499	0	0.450576
Q6NT55	CYP4F22	3	1	0	0	2	5.12998e-06	1.84957e-06	0.360541	NaN	NaN	NA	0	0	0.29879	NA	0	0.60499	0	1
Q9C0E8	LNPK	3	1	1	5	3	2.04268e-06	6.04533e-07	0.295951	1.88935e-06	1.37153e-05	7.25928	0	0	0.29879	0.074256	0	0.60499	1	0.181764
Q9P2R7	SUCLA2	1	3	2	1	0	7.22409e-07	2.1127e-06	2.92452	4.06884e-06	1.54571e-06	0.37989	0	0	0.29879	0.573704	1	0.60499	0	1
Q96A26	FAM162A	8	11	9	8	4	1.3417e-05	2.21169e-05	1.64842	1.18469e-05	1.01992e-05	0.860916	0	0	0.29918	0.821669	1	0.527254	0	1
Q08380	LGALS3BP	15	15	19	16	12	0.00014553	7.03346e-05	0.483298	0.000157214	6.98544e-05	0.444327	0	1	0.300224	0.0313578	0	1	0	0.341649
P34932	HSPA4	20	20	20	20	18	0.000111878	9.88444e-05	0.883501	8.91062e-05	8.87573e-05	0.996084	0	1	0.301253	0.658798	0	1	0	1
P30520	ADSS2	16	12	11	7	3	3.06004e-05	2.30743e-05	0.754052	2.53039e-05	1.31712e-05	0.520519	0	0	0.303825	0.146641	0	0.300845	0	0.340644
P43405,P43403,Q8NFD2	SYK,ZAP70,ANKK1	12	8	8	3	1	1.90219e-05	1.33983e-05	0.704362	1.18586e-05	3.73963e-06	0.315351	0	0	0.304683	0.076653	0	0.343067	0	0.155187
P46778	RPL21	8	5	4	2	2	1.46277e-05	9.85051e-06	0.673414	8.29225e-06	8.77641e-06	1.05839	0	0	0.305933	0.472531	0	0.500603	0	0.66142
Q8IZP0,Q9NYB9	ABI1,ABI2	4	2	7	7	2	7.77569e-06	2.90266e-06	0.373299	7.33856e-06	8.81128e-06	1.20068	0	0	0.306247	0.799462	0	0.66142	0	1
Q9UNS2	COPS3	4	2	1	1	2	1.07012e-06	3.37905e-07	0.315765	1.89533e-06	2.42878e-06	1.28145	0	0	0.306247	1	0	0.66142	0	1
P25786	PSMA1	16	14	14	17	8	7.59261e-05	5.77663e-05	0.760823	5.83657e-05	7.95173e-05	1.3624	0	0	0.306629	0.634029	0	0.716427	1	0.450576
P00403	MT-CO2	17	14	11	12	10	0.000143196	0.00010753	0.750925	6.94667e-05	8.85404e-05	1.27457	0	0	0.307664	0.345687	0	0.450576	1	1
Q5VVQ6	YOD1	3	6	4	5	12	1.07828e-05	1.71006e-05	1.58592	2.83904e-05	4.05968e-05	1.42995	0	0	0.309018	0.643793	1	0.450576	1	1
P58546	MTPN	18	16	19	13	13	3.84611e-05	3.26507e-05	0.848928	3.84138e-05	2.52345e-05	0.656913	0	0	0.309607	0.0609506	0	0.66142	0	0.043596
P08670,P17661,P41219,Q16352,P07197,P07196	VIM,DES,PRPH,INA,NEFM,NEFL	20	18	18	19	18	0.00201112	0.00164211	0.816515	0.0024929	0.00158572	0.636095	0	1	0.31038	0.208368	0	0.487179	1	1
Q9Y6E0,Q9P289	STK24,STK26	20	18	0	0	0	3.13203e-05	2.83544e-05	0.905306	NaN	NaN	NA	0	0	0.31038	NA	0	0.487179	0	1
P0CAP1	MYZAP	9	11	5	6	9	9.24124e-06	1.30839e-05	1.41582	4.21942e-06	5.33846e-06	1.26521	0	0	0.311545	0.770126	1	0.752371	1	1
P11678	EPX	9	11	7	7	7	4.57721e-05	5.6585e-05	1.23623	6.68773e-05	3.66477e-05	0.547984	0	0	0.311545	0.924103	1	0.752371	0	1
P27701	CD82	9	6	3	1	0	8.72412e-06	6.16609e-06	0.706786	4.37561e-06	2.06661e-06	0.472302	0	0	0.312003	0.323604	0	0.514476	0	0.60499
Q9ULV0	MYO5B	7	12	5	7	5	9.15769e-06	1.46292e-05	1.59748	3.65098e-06	5.21177e-06	1.4275	0	0	0.312999	0.462909	1	0.204927	1	0.731094
Q9Y5P6	GMPPB	11	8	2	2	2	8.04304e-06	5.88802e-06	0.732063	2.48094e-06	1.61839e-06	0.652329	0	0	0.312999	0.937886	0	0.527254	0	1
Q16831	UPP1	7	11	8	14	18	3.08515e-05	4.51703e-05	1.46412	4.4758e-05	7.9613e-05	1.77874	0	0	0.313856	0.081025	1	0.340644	1	0.11097
Q53GQ0	HSD17B12	12	10	13	8	8	1.29957e-05	9.52599e-06	0.733012	1.62789e-05	9.66955e-06	0.593993	0	0	0.313866	0.165058	0	0.751186	0	0.204927
P02675	FGB	20	19	18	19	13	0.00086216	0.000510395	0.591996	0.00075413	0.000478115	0.633996	0	1	0.314084	0.0809747	0	1	1	1
P37802	TAGLN2	20	20	0	0	0	0.000435049	0.000389322	0.894893	NaN	NaN	NA	0	0	0.314084	NA	0	1	0	1
P49354	FNTA	5	3	2	2	1	2.88048e-06	1.19061e-06	0.413337	1.19888e-06	9.89564e-07	0.825406	0	0	0.314133	0.937886	0	0.694765	0	1
Q9Y6D6	ARFGEF1	5	3	6	4	5	3.10959e-06	1.20515e-06	0.387561	2.18638e-05	2.11512e-05	0.967408	0	0	0.314133	0.631091	0	0.694765	0	0.716427
P01023	A2M	19	19	18	15	13	0.000915648	0.00064834	0.708067	0.00121763	0.000619345	0.508648	0	0	0.316875	0.0204015	0	1	0	0.407484
O95487	SEC24B	2	5	4	3	1	7.61294e-07	1.055e-06	1.38579	1.37397e-06	1.33628e-06	0.972573	0	0	0.317003	0.728472	1	0.407484	0	1
Q13185,P83916	CBX3,CBX1	5	2	3	0	0	4.85962e-06	2.30401e-06	0.474113	1.99176e-06	NaN	NA	0	0	0.317003	NA	0	0.407484	0	0.230769
P46734,P52564	MAP2K3,MAP2K6	13	10	6	3	5	8.74245e-06	6.45423e-06	0.738264	3.64703e-06	2.11183e-06	0.579056	0	0	0.317656	0.309018	0	0.523107	0	0.450576
P48163,Q16798	ME1,ME3	10	13	0	0	0	2.04982e-05	2.84102e-05	1.38599	NaN	NaN	NA	0	0	0.317656	NA	1	0.523107	0	1
O76003	GLRX3	8	12	2	3	5	6.7008e-06	1.00928e-05	1.5062	1.77823e-06	2.71513e-06	1.52687	0	0	0.318508	0.689065	1	0.343067	1	1
P31941,Q9UH17	APOBEC3A,APOBEC3B	12	8	7	9	0	6.31277e-05	4.92245e-05	0.77976	5.43284e-05	8.88776e-05	1.63593	0	0	0.318508	0.501586	0	0.343067	1	0.747527
P20674	COX5A	13	9	4	6	0	3.03891e-05	3.25315e-05	1.0705	1.16906e-05	1.11083e-05	0.950188	0	0	0.32073	0.465892	0	0.340644	1	0.716427
P01624,A0A0C4DH55	IGKV3-15,IGKV3D-7	16	15	14	5	3	0.000306292	0.0002142	0.699332	0.000186853	6.23264e-05	0.333559	0	0	0.320743	0.012404	0	1	0	0.0103867
Q13492,O60641	PICALM,SNAP91	10	8	8	3	0	4.61699e-06	3.19359e-06	0.691703	9.03521e-06	3.79828e-06	0.420387	0	0	0.321026	0.109919	0	0.751186	0	0.155187
Q9Y2G3	ATP11B	5	8	0	3	1	1.37087e-06	2.19364e-06	1.60018	NaN	1.09391e-06	NA	0	0	0.321543	NA	1	0.500603	1	0.230769
Q9P0L0	VAPA	17	16	14	11	6	4.83109e-05	3.69598e-05	0.765042	5.2146e-05	3.36672e-05	0.645633	0	0	0.322207	0.237575	0	1	0	0.514476
Q02218,Q9ULD0	OGDH,OGDHL	20	15	7	13	7	3.28984e-05	1.52131e-05	0.462428	1.84881e-05	2.47733e-05	1.33996	0	0	0.323027	0.111775	0	0.047124	1	0.112834
Q99798	ACO2	19	16	12	15	9	0.000110278	6.05634e-05	0.549187	5.80101e-05	5.9961e-05	1.03363	0	0	0.323027	0.11992	0	0.341649	1	0.500603
P38646	HSPA9	20	18	16	16	9	0.00011592	7.75924e-05	0.66936	5.92712e-05	5.85887e-05	0.988484	0	1	0.323459	0.377446	0	0.487179	0	1
A0A087WSX0,A0A0G2JS06	IGLV5-45,IGLV5-39	3	1	0	0	0	3.30281e-06	1.10444e-06	0.334393	NaN	NaN	NA	0	0	0.323604	NA	0	0.60499	0	1
A6NHR9	SMCHD1	3	1	0	0	0	3.43055e-07	1.25719e-07	0.366469	NaN	NaN	NA	0	0	0.323604	NA	0	0.60499	0	1
O95497,Q9NY84	VNN1,VNN3	3	1	3	1	0	1.27258e-06	4.711e-07	0.370193	5.15134e-06	8.76069e-07	0.170066	0	0	0.323604	0.275281	0	0.60499	0	0.60499
P07225	PROS1	3	1	1	0	0	3.65076e-06	1.27558e-06	0.349402	3.33572e-06	NaN	NA	0	0	0.323604	NA	0	0.60499	0	1
P12273	PIP	1	3	3	3	4	1.44328e-05	3.21172e-05	2.22529	0.000230458	3.57987e-05	0.155337	0	0	0.323604	0.930612	1	0.60499	0	1
P20933	AGA	3	1	0	1	2	9.47705e-07	3.41902e-07	0.360769	NaN	1.13823e-06	NA	0	0	0.323604	NA	0	0.60499	1	1
Q12841	FSTL1	3	1	0	0	0	1.92356e-06	8.02004e-07	0.416937	NaN	NaN	NA	0	0	0.323604	NA	0	0.60499	0	1
Q13564	NAE1	3	1	1	0	0	1.30354e-06	5.25407e-07	0.403063	5.70287e-07	NaN	NA	0	0	0.323604	NA	0	0.60499	0	1
Q14728	MFSD10	3	1	0	1	0	2.21052e-07	1.06641e-07	0.482425	NaN	4.70799e-08	NA	0	0	0.323604	NA	0	0.60499	1	1
Q15582	TGFBI	3	1	2	0	0	4.32732e-06	1.40036e-06	0.323609	1.193e-06	NaN	NA	0	0	0.323604	NA	0	0.60499	0	0.487179
Q71UI9,P0C0S5	H2AZ2,H2AZ1	3	1	2	1	1	7.16625e-06	2.5325e-06	0.353392	7.8531e-06	2.56988e-06	0.327243	0	0	0.323604	0.534056	0	0.60499	0	1
Q9H4G0	EPB41L1	3	1	3	1	0	7.52877e-06	3.90747e-06	0.519005	1.7837e-05	5.84765e-06	0.327838	0	0	0.323604	0.323604	0	0.60499	0	0.60499
Q9P035	HACD3	3	1	3	1	0	1.62306e-05	5.05434e-06	0.311407	6.51764e-06	1.34371e-05	2.06165	0	0	0.323604	0.349723	0	0.60499	0	0.60499
Q9Y2X3	NOP58	3	1	1	2	0	5.4207e-06	1.79321e-06	0.330807	2.17705e-06	2.58725e-06	1.18842	0	0	0.323604	0.614695	0	0.60499	1	1
Q9Y6E2	BZW2	3	1	1	1	0	1.9942e-06	7.25418e-07	0.363764	1.10477e-06	9.19309e-07	0.832127	0	0	0.323604	1	0	0.60499	0	1
Q6ZNJ1	NBEAL2	14	11	11	12	3	1.06443e-05	8.55818e-06	0.804012	9.90408e-06	9.63918e-06	0.973253	0	0	0.323868	0.988771	0	0.514476	1	1
O14976	GAK	6	3	2	0	0	2.29448e-06	1.3538e-06	0.590022	9.80697e-07	NaN	NA	0	0	0.326942	NA	0	0.450576	0	0.487179
P35611,P35612	ADD1,ADD2	3	6	4	2	1	4.04547e-06	4.59919e-06	1.13687	6.22498e-06	5.17265e-06	0.83095	0	0	0.326942	0.472531	1	0.450576	0	0.66142
Q9H2C0	GAN	7	4	1	6	4	3.92125e-06	1.89495e-06	0.483252	5.15776e-07	6.51385e-06	12.6292	0	0	0.327204	0.0320153	0	0.480115	1	0.0914761
P56192	MARS1	8	11	7	6	1	3.2162e-06	4.74289e-06	1.47469	3.94105e-06	3.88562e-06	0.985934	0	0	0.327232	0.909432	1	0.527254	0	1
P00738	HP	20	19	18	20	14	0.00216214	0.00167171	0.773175	0.00217776	0.00118623	0.544702	0	1	0.327262	0.0858402	0	1	1	0.487179
P04075	ALDOA	20	20	20	20	19	0.00322807	0.00290508	0.899943	0.0024764	0.00299086	1.20775	0	1	0.327262	0.1207	0	1	0	1
P19105,O14950,P24844	MYL12A,MYL12B,MYL9	20	19	20	20	19	0.0002671	0.000226567	0.848247	0.000221526	0.000185086	0.835503	0	1	0.327262	0.327262	0	1	0	1
Q92597	NDRG1	20	20	20	19	18	0.000203061	0.000180787	0.890305	0.000165896	0.000201376	1.21387	0	1	0.327262	0.24227	0	1	0	1
P15090,P02689	FABP4,PMP2	2	4	4	2	1	2.68605e-06	1.0338e-05	3.8488	1.01126e-05	3.24549e-06	0.320936	0	0	0.327288	0.349245	1	0.66142	0	0.66142
Q9P0G3	KLK14	2	4	1	8	6	2.82006e-06	1.45887e-05	5.1732	3.89552e-06	1.97534e-05	5.07079	0	0	0.327288	0.0138945	1	0.66142	1	0.019656
O00442	RTCA	4	6	5	5	7	1.20705e-06	2.31254e-06	1.91586	2.16835e-06	1.7385e-06	0.801761	0	0	0.327991	0.831001	1	0.716427	0	1
P61916	NPC2	11	6	5	1	1	1.89177e-05	1.3042e-05	0.68941	8.20349e-06	2.33559e-06	0.284706	0	0	0.328703	0.107205	0	0.200287	0	0.181764
O60506	SYNCRIP	19	15	7	11	8	5.75964e-05	4.49492e-05	0.780417	1.09992e-05	1.53735e-05	1.39769	0	0	0.329359	0.172998	0	0.181764	1	0.340644
Q9NXR7	BABAM2	7	5	4	1	1	1.02029e-06	5.59708e-07	0.548576	9.44816e-07	1.50221e-07	0.158995	0	0	0.333228	0.138124	0	0.731094	0	0.341649
P12830	CDH1	18	15	15	18	15	5.05859e-05	3.67307e-05	0.726105	5.00442e-05	5.09239e-05	1.01758	0	1	0.335643	0.217194	0	0.407484	1	0.407484
Q04637,O43432	EIF4G1,EIF4G3	20	18	18	19	11	6.89179e-05	5.75927e-05	0.835672	4.87017e-05	5.73185e-05	1.17693	0	1	0.336893	0.155492	0	0.487179	1	1
P01876	IGHA1	20	20	20	20	19	0.0109944	0.00699267	0.636023	0.0074587	0.00439754	0.589585	0	1	0.340785	0.0283084	0	1	0	1
Q00796	SORD	20	19	18	19	18	8.82475e-05	7.64407e-05	0.866209	6.38695e-05	6.80444e-05	1.06536	0	1	0.340785	0.336825	0	1	1	1
Q14204	DYNC1H1	20	20	20	20	19	0.000363794	0.000314115	0.863441	0.000233694	0.00027015	1.156	0	1	0.340785	0.0523995	0	1	0	1
Q9UJU6	DBNL	20	20	20	20	18	0.000172169	0.000168473	0.978534	0.000124721	0.000137354	1.1013	0	1	0.340785	0.639514	0	1	0	1
Q9UKG1	APPL1	9	6	9	6	4	6.24401e-06	3.87485e-06	0.620571	9.72964e-06	6.35571e-06	0.653232	0	0	0.342717	0.327126	0	0.514476	0	0.514476
Q9UKR0	KLK12	6	9	11	12	13	4.71261e-05	7.36462e-05	1.56275	6.56236e-05	9.34548e-05	1.4241	0	0	0.342717	0.602538	1	0.514476	1	1
Q08379	GOLGA2	7	11	5	11	4	3.09095e-06	4.32859e-06	1.4004	1.67843e-06	3.7798e-06	2.25198	0	0	0.343171	0.0543104	1	0.340644	1	0.10534
P02671	FGA	17	19	15	16	12	0.000419828	0.000171542	0.4086	0.000320627	0.000230584	0.719165	0	1	0.343538	0.178116	1	0.60499	1	1
B3EWG6,B3EWG5,B3EWG3	FAM25G,FAM25C,FAM25A	7	9	9	9	14	2.19302e-05	4.25362e-05	1.93962	3.45927e-05	3.58283e-05	1.03572	0	0	0.343688	0.952757	1	0.747527	0	1
O94919	ENDOD1	7	9	2	6	7	6.35118e-06	1.21621e-05	1.91493	1.26333e-06	4.79886e-06	3.79858	0	0	0.343688	0.0921623	1	0.747527	1	0.235116
Q16836	HADH	10	7	14	11	11	2.29651e-05	1.33759e-05	0.582444	3.79556e-05	2.35604e-05	0.620735	0	0	0.343804	0.337684	0	0.523107	0	0.514476
Q8NCW5	NAXE	6	4	3	0	0	2.16157e-06	9.38776e-07	0.434303	2.8724e-06	NaN	NA	0	0	0.345886	NA	0	0.716427	0	0.230769
A5YKK6	CNOT1	4	2	3	2	1	9.07182e-07	2.59165e-07	0.285681	1.46129e-06	7.13632e-07	0.488356	0	0	0.349245	0.58827	0	0.66142	0	1
O14493,O95484,P56747,O15551	CLDN4,CLDN9,CLDN6,CLDN3	4	2	2	2	0	1.91454e-06	6.68081e-07	0.348951	2.03217e-06	9.51246e-07	0.468095	0	0	0.349245	0.937886	0	0.66142	0	1
Q12805	EFEMP1	4	2	2	1	0	6.83194e-06	2.40959e-06	0.352695	1.87853e-06	8.8443e-07	0.470809	0	0	0.349245	0.573704	0	0.66142	0	1
Q8TCU6	PREX1	2	4	0	1	1	1.42452e-06	4.85367e-06	3.40723	NaN	3.4154e-06	NA	0	0	0.349245	NA	1	0.66142	1	1
Q8TED4	SLC37A2	2	4	1	0	4	7.63869e-07	2.39752e-06	3.13865	7.87937e-07	NaN	NA	0	0	0.349245	NA	1	0.66142	0	1
O94875	SORBS2	3	1	0	0	0	8.91319e-07	3.59351e-07	0.403168	NaN	NaN	NA	0	0	0.349723	NA	0	0.60499	0	1
P04066	FUCA1	3	1	1	2	0	3.78092e-06	1.45948e-06	0.386012	2.50236e-06	4.7236e-07	0.188766	0	0	0.349723	0.614695	0	0.60499	1	1
P19525	EIF2AK2	3	1	0	0	0	4.07238e-07	1.94691e-07	0.478077	NaN	NaN	NA	0	0	0.349723	NA	0	0.60499	0	1
Q3ZCM7	TUBB8	3	1	0	0	1	2.40105e-06	2.71988e-06	1.13279	NaN	NaN	NA	0	0	0.349723	NA	0	0.60499	0	1
Q8N271	PROM2	3	1	2	1	0	4.20714e-06	3.48112e-06	0.827431	9.92442e-06	5.10879e-06	0.51477	0	0	0.349723	0.573704	0	0.60499	0	1
Q99733	NAP1L4	1	3	3	2	1	8.55677e-07	1.62562e-06	1.89981	5.01002e-06	2.70814e-06	0.540545	0	0	0.349723	0.654732	1	0.60499	0	1
Q9P253	VPS18	3	1	2	3	0	1.07134e-07	4.64877e-08	0.43392	3.04959e-07	4.9013e-07	1.6072	0	0	0.349723	0.654732	0	0.60499	1	1
Q9Y6M9	NDUFB9	3	1	1	1	0	1.96832e-06	1.0186e-06	0.517494	3.34687e-06	1.80622e-06	0.539673	0	0	0.349723	1	0	0.60499	0	1
Q15185	PTGES3	18	16	14	12	12	8.59281e-05	7.41302e-05	0.8627	5.26727e-05	4.56927e-05	0.867483	0	0	0.34991	0.668272	0	0.66142	0	0.741054
O95747	OXSR1	19	18	19	20	15	2.3888e-05	2.13796e-05	0.894993	3.19066e-05	3.25859e-05	1.02129	0	1	0.350612	0.620465	0	1	1	1
P0DP25,P0DP24,P0DP23,P02585	CALM3,CALM2,CALM1,TNNC2	20	18	0	0	0	0.000324943	0.000281921	0.867599	NaN	NaN	NA	0	0	0.35068	NA	0	0.487179	0	1
Q14677	CLINT1	17	11	1	1	0	9.45989e-06	7.62894e-06	0.806451	5.30691e-06	1.61375e-06	0.304085	0	0	0.351184	1	0	0.0823588	0	1
Q03518	TAP1	8	5	4	6	1	8.19056e-06	4.4449e-06	0.542686	4.71626e-06	7.18931e-06	1.52437	0	0	0.354296	0.510512	0	0.500603	1	0.716427
P01860	IGHG3	20	20	20	20	19	0.00368617	0.00285611	0.774818	0.00280414	0.00178535	0.636683	0	1	0.354652	0.0634324	0	1	0	1
P02679	FGG	19	19	19	19	17	0.000961427	0.000605372	0.62966	0.0008788	0.000573223	0.652279	0	1	0.357705	0.0397918	0	1	0	1
Q14258	TRIM25	9	6	7	7	3	1.18665e-05	7.80611e-06	0.657829	8.3223e-06	7.3188e-06	0.879421	0	0	0.358775	0.898923	0	0.514476	0	1
P13727	PRG2	7	10	9	5	7	6.02496e-05	6.18187e-05	1.02604	6.91722e-05	3.3991e-05	0.491397	0	0	0.35934	0.26638	1	0.523107	0	0.320266
Q5VYK3	ECPAS	9	7	4	3	0	1.51392e-06	9.37338e-07	0.619145	6.23605e-07	5.8274e-07	0.93447	0	0	0.359479	0.698015	0	0.747527	0	1
Q02543	RPL18A	17	14	17	14	12	4.89307e-05	3.94139e-05	0.805506	4.94407e-05	5.13243e-05	1.0381	0	0	0.362126	0.713433	0	0.450576	0	0.450576
Q9Y383,Q9NQ29	LUC7L2,LUC7L	7	4	2	0	0	4.48468e-06	2.49999e-06	0.55745	2.45776e-06	NaN	NA	0	0	0.362292	NA	0	0.480115	0	0.487179
Q6WKZ4,Q7L804	RAB11FIP1,RAB11FIP2	8	12	3	2	3	8.14394e-06	1.10326e-05	1.3547	9.73411e-07	4.90185e-07	0.503575	0	0	0.362407	0.689065	1	0.343067	0	1
O95498	VNN2	4	6	6	4	2	5.28851e-06	9.25557e-06	1.75013	1.01178e-05	5.18333e-06	0.512298	0	0	0.364392	0.423526	1	0.716427	0	0.716427
Q9BZF9	UACA	6	4	0	0	1	3.42502e-06	1.24332e-06	0.363011	NaN	NaN	NA	0	0	0.364392	NA	0	0.716427	0	1
P04792	HSPB1	20	20	20	20	19	0.0115269	0.0104916	0.910184	0.00900992	0.0103256	1.14602	0	1	0.368862	0.134419	0	1	0	1
P22570	FDXR	8	5	1	3	0	1.35937e-05	3.82074e-06	0.281068	3.78998e-06	6.25447e-06	1.65026	0	0	0.371436	0.323604	0	0.500603	1	0.60499
Q6P2Q9	PRPF8	8	5	2	3	0	8.60741e-06	3.1111e-06	0.361445	4.44754e-06	4.08018e-06	0.917403	0	0	0.371436	0.689065	0	0.500603	1	1
P48147	PREP	19	19	19	19	18	6.24444e-05	5.31837e-05	0.851698	0.000919839	0.00104774	1.13905	0	1	0.372021	0.913833	0	1	0	1
O14841	OPLAH	4	2	2	1	3	3.01692e-06	1.25219e-06	0.415055	1.42047e-06	6.15145e-07	0.433057	0	0	0.372116	0.573704	0	0.66142	0	1
P61086	UBE2K	2	4	3	6	8	1.81e-06	3.8178e-06	2.10928	1.64984e-06	5.34366e-06	3.23889	0	0	0.372116	0.165379	1	0.66142	1	0.450576
Q14240	EIF4A2	4	2	3	2	1	4.34138e-06	1.5981e-06	0.368108	1.26789e-05	5.70921e-06	0.450294	0	0	0.372116	0.621115	0	0.66142	0	1
P14324	FDPS	11	8	9	5	4	2.26637e-05	1.63541e-05	0.721598	1.39806e-05	8.24047e-06	0.589422	0	0	0.37241	0.280284	0	0.527254	0	0.320266
O76041	NEBL	5	3	0	1	1	3.37134e-06	1.69897e-06	0.503946	NaN	8.07066e-07	NA	0	0	0.373228	NA	0	0.694765	1	1
Q99447	PCYT2	5	3	2	0	1	6.88558e-07	3.21933e-07	0.467546	8.35448e-07	NaN	NA	0	0	0.373228	NA	0	0.694765	0	0.487179
O75964	ATP5MG	11	7	4	7	0	1.50715e-05	1.12192e-05	0.744398	1.0646e-05	1.1539e-05	1.08388	0	0	0.374179	0.263878	0	0.340644	1	0.480115
Q5D862	FLG2	7	11	10	10	7	1.2481e-05	1.81987e-05	1.45811	9.87639e-06	2.32332e-05	2.3524	0	0	0.374179	0.942375	1	0.340644	0	1
Q9GZN4	PRSS22	6	9	3	4	2	1.48075e-05	2.73404e-05	1.84639	6.53629e-06	1.11445e-05	1.70502	0	0	0.375298	0.698015	1	0.514476	1	1
P98088	MUC5AC	14	16	14	10	13	0.000101322	0.000208553	2.05832	0.000413399	0.000107834	0.260848	0	0	0.375611	0.184201	1	0.716427	0	0.333213
Q9Y6Q5	AP1M2	9	7	0	2	2	1.28803e-05	8.19332e-06	0.636114	NaN	2.41228e-06	NA	0	0	0.375718	NA	0	0.747527	1	0.487179
P29034	S100A2	16	15	16	13	10	0.00037635	0.000511961	1.36034	0.000399446	0.000270057	0.676079	0	0	0.376632	0.245366	0	1	0	0.480115
P50552	VASP	17	14	13	10	7	0.000124582	0.000106282	0.853111	0.000144549	8.10693e-05	0.560844	0	0	0.376632	0.172183	0	0.450576	0	0.523107
P09622	DLD	18	14	15	8	4	0.000131751	8.94287e-05	0.67877	0.000217997	9.94715e-05	0.456297	0	0	0.377446	0.0996175	0	0.235116	0	0.053551
Q08211	DHX9	19	18	19	19	16	5.46041e-05	4.25131e-05	0.77857	5.06252e-05	5.36665e-05	1.06007	0	1	0.379242	0.279228	0	1	0	1
P10809	HSPD1	20	18	20	15	13	0.000149415	0.000127555	0.853696	0.000133049	0.000103584	0.778543	0	0	0.37931	0.507107	0	0.487179	0	0.047124
P51178	PLCD1	11	10	5	10	5	1.67652e-05	1.19696e-05	0.71396	4.84707e-06	1.08105e-05	2.23031	0	0	0.382647	0.07881	0	1	1	0.190793
O43707,Q08043	ACTN4,ACTN3	20	20	0	0	0	0.00352188	0.00331758	0.94199	NaN	NaN	NA	0	0	0.383413	NA	0	1	0	1
P05141,Q9H0C2	SLC25A5,SLC25A31	20	19	8	8	5	0.0005231	0.000419661	0.802257	4.18277e-05	3.55946e-05	0.850981	0	0	0.383413	0.680075	0	1	0	1
P13796	LCP1	20	19	19	20	19	0.0018979	0.00176406	0.929483	0.00217759	0.00155422	0.713734	0	1	0.383413	0.276627	0	1	1	1
P63261	ACTG1	20	20	6	0	4	0.0307862	0.0291383	0.946475	6.16924e-06	NaN	NA	0	0	0.383413	NA	0	1	0	0.020196
Q06830	PRDX1	20	20	20	20	19	0.00165582	0.00159103	0.96087	0.00130688	0.00160662	1.22936	0	1	0.383413	0.221065	0	1	0	1
Q9Y6C9	MTCH2	6	4	8	4	3	9.49761e-06	4.85446e-06	0.511124	9.77048e-06	4.39003e-06	0.449316	0	0	0.383504	0.223269	0	0.716427	0	0.300845
P28331	NDUFS1	19	13	14	16	11	3.78353e-05	2.37568e-05	0.6279	4.61943e-05	3.70357e-05	0.801738	0	0	0.384829	0.859349	0	0.043596	1	0.716427
Q9Y285	FARSA	5	7	1	2	2	1.16991e-06	2.51365e-06	2.14858	1.57627e-06	2.00237e-06	1.27033	0	0	0.38565	0.614695	1	0.731094	1	1
P12270	TPR	11	9	9	14	13	4.0755e-06	2.50217e-06	0.613954	5.85129e-06	8.15083e-06	1.393	0	0	0.385714	0.105542	0	0.752371	1	0.200287
P84098	RPL19	11	9	4	7	1	3.44047e-05	2.46104e-05	0.715321	9.98272e-06	1.47362e-05	1.47617	0	0	0.385714	0.362292	0	0.752371	1	0.480115
P04114	APOB	12	10	12	8	7	0.000150726	0.000116668	0.774038	9.20493e-05	5.47033e-05	0.594283	0	0	0.386878	0.12902	0	0.751186	0	0.343067
Q5T4S7	UBR4	12	10	8	10	11	7.82912e-06	6.72414e-06	0.858863	4.66016e-06	5.16785e-06	1.10894	0	0	0.386878	0.543678	0	0.751186	1	0.751186
Q9H444	CHMP4B	10	9	5	6	1	1.87144e-05	1.44582e-05	0.772567	6.13352e-06	6.87725e-06	1.12126	0	0	0.388289	0.74398	0	1	1	1
Q13177	PAK2	8	5	0	0	0	1.05358e-05	7.2644e-06	0.689498	NaN	NaN	NA	0	0	0.389081	NA	0	0.500603	0	1
Q13724	MOGS	13	10	10	5	1	3.77251e-06	2.84488e-06	0.754108	4.48107e-06	1.41974e-06	0.316832	0	0	0.390593	0.0687818	0	0.523107	0	0.190793
Q13885,Q9BVA1	TUBB2A,TUBB2B	11	12	14	16	18	3.26829e-05	4.35036e-05	1.33108	5.71812e-05	8.30686e-05	1.45272	0	0	0.390593	0.104786	1	1	1	0.716427
Q6IAA8	LAMTOR1	9	6	2	3	0	6.63716e-06	4.92582e-06	0.742158	2.25666e-06	2.42832e-06	1.07607	0	0	0.392283	0.72405	0	0.514476	1	1
P08133	ANXA6	18	14	16	12	11	0.000238695	0.000177068	0.741817	0.000266216	0.000225127	0.845655	0	0	0.392299	0.121321	0	0.235116	0	0.300845
P62081	RPS7	9	7	9	6	12	2.77726e-05	1.8159e-05	0.653845	1.78806e-05	1.37717e-05	0.770207	0	0	0.392403	0.523653	0	0.747527	0	0.514476
P41240,P42679	CSK,MATK	19	18	17	17	16	3.03959e-05	2.62345e-05	0.863091	2.17641e-05	1.73228e-05	0.795936	0	1	0.394082	0.0929835	0	1	0	1
P68366	TUBA4A	19	18	20	19	18	8.69894e-05	7.90102e-05	0.908274	0.000281821	0.000225804	0.801233	0	1	0.394082	0.276627	0	1	0	1
P16070	CD44	5	3	1	2	0	1.73477e-05	1.18933e-05	0.685581	1.30364e-05	1.19671e-05	0.917976	0	0	0.394365	0.614695	0	0.694765	1	1
P30504,P30510	HLA-C	5	3	0	0	0	1.6884e-05	9.04375e-06	0.535641	NaN	NaN	NA	0	0	0.394365	NA	0	0.694765	0	1
P35813	PPM1A	5	3	1	0	0	5.24157e-06	3.4173e-06	0.651961	4.32328e-07	NaN	NA	0	0	0.394365	NA	0	0.694765	0	1
P19652	ORM2	11	11	16	11	8	0.000286412	0.000116411	0.406448	0.0003327	0.000117674	0.353694	0	0	0.39471	0.00857495	0	1	0	0.175996
O14672	ADAM10	2	4	2	2	0	2.9807e-06	3.59344e-06	1.20557	4.75359e-06	7.89076e-06	1.65996	0	0	0.395893	0.937886	1	0.66142	0	1
O43548	TGM5	2	4	3	5	9	1.18812e-06	3.01191e-06	2.53502	9.60446e-07	3.00158e-06	3.1252	0	0	0.395893	0.295883	1	0.66142	1	0.694765
O95445	APOM	4	2	0	0	1	6.7096e-06	3.11001e-06	0.463516	NaN	NaN	NA	0	0	0.395893	NA	0	0.66142	0	1
Q9H0P0	NT5C3A	2	4	4	6	10	4.45626e-06	9.16005e-06	2.05555	4.968e-06	9.09982e-06	1.83169	0	0	0.395893	0.423526	1	0.66142	1	0.716427
Q9H8Y8	GORASP2	4	2	0	0	0	2.17578e-06	1.03232e-06	0.474459	NaN	NaN	NA	0	0	0.395893	NA	0	0.66142	0	1
P61619,Q9H9S3	SEC61A1,SEC61A2	11	14	7	9	5	1.9795e-05	2.24758e-05	1.13543	1.40715e-05	2.52732e-05	1.79605	0	0	0.396666	0.285031	1	0.514476	1	0.747527
Q92882	OSTF1	15	15	12	12	14	3.54303e-05	2.46986e-05	0.697105	3.28642e-05	2.00456e-05	0.609952	0	0	0.398045	0.257535	0	1	0	1
P01833	PIGR	20	19	19	18	17	0.00186146	0.0010291	0.552845	0.00113527	0.000755746	0.665696	0	1	0.398302	0.297586	0	1	0	1
P07737	PFN1	20	20	20	20	19	0.00146679	0.00130111	0.887046	0.000866181	0.00062407	0.720484	0	1	0.398302	0.141705	0	1	0	1
P15311	EZR	20	20	20	20	19	0.000698176	0.000617004	0.883737	0.00107882	0.00112332	1.04125	0	1	0.398302	0.861987	0	1	0	1
P49189	ALDH9A1	20	20	20	20	19	0.000257979	0.00023879	0.925619	0.000223023	0.000250196	1.12184	0	1	0.398302	0.477691	0	1	0	1
Q5VT79	ANXA8L1	20	19	0	1	0	0.000348348	0.000299567	0.859965	NaN	1.01548e-06	NA	0	0	0.398302	NA	0	1	1	1
Q92608	DOCK2	4	7	6	4	1	8.8088e-06	1.21157e-05	1.3754	1.59703e-05	8.15487e-06	0.510626	0	0	0.399648	0.444421	1	0.480115	0	0.716427
Q96KP1	EXOC2	7	4	1	1	0	1.47675e-06	9.8327e-07	0.665835	2.85041e-07	4.8662e-07	1.70719	0	0	0.399648	1	0	0.480115	0	1
P26599	PTBP1	19	19	20	18	16	7.04915e-05	6.03906e-05	0.856708	9.07556e-05	7.07822e-05	0.779921	0	1	0.401698	0.560833	0	1	0	0.487179
O95817	BAG3	11	9	6	5	4	1.06489e-05	6.53423e-06	0.613605	5.32397e-06	4.26862e-06	0.801775	0	0	0.401748	0.69259	0	0.752371	0	1
P84085	ARF5	9	11	5	9	7	2.14452e-05	2.7395e-05	1.27744	1.10031e-05	1.86268e-05	1.69286	0	0	0.401748	0.240015	1	0.752371	1	0.320266
Q13620,Q13619	CUL4B,CUL4A	4	6	0	0	0	1.37002e-06	2.50583e-06	1.82905	NaN	NaN	NA	0	0	0.403217	NA	1	0.716427	0	1
Q13347	EIF3I	15	14	15	15	13	1.42685e-05	1.24401e-05	0.871862	1.60726e-05	1.61878e-05	1.00716	0	0	0.404464	0.723036	0	1	0	1
P13667	PDIA4	16	16	14	16	9	2.63534e-05	2.36503e-05	0.897427	3.23013e-05	3.228e-05	0.999339	0	0	0.407502	0.29391	0	1	1	0.716427
P16403	H1-2	20	14	0	0	0	0.00033698	0.000262505	0.778994	NaN	NaN	NA	0	0	0.408585	NA	0	0.020196	0	1
Q9NYU2	UGGT1	8	7	0	0	0	9.56109e-06	5.63551e-06	0.589421	NaN	NaN	NA	0	0	0.409726	NA	0	1	0	1
O43396	TXNL1	13	12	8	13	9	1.43809e-05	1.16624e-05	0.810963	7.6285e-06	1.19259e-05	1.56334	0	0	0.412329	0.173945	0	1	1	0.204927
Q9NZT1	CALML5	12	13	15	15	17	9.85471e-05	0.000221466	2.24731	0.000123284	0.00025948	2.10473	0	0	0.412329	0.0909825	1	1	0	1
P21333	FLNA	20	19	20	20	18	0.00043796	0.000404118	0.922726	0.000469806	0.000307247	0.653986	0	1	0.413526	0.288767	0	1	0	1
P11310	ACADM	17	15	7	9	0	5.279e-05	4.23385e-05	0.802017	1.39121e-05	2.0453e-05	1.47016	0	0	0.415233	0.427092	0	0.694765	1	0.747527
P58062	SPINK7	8	10	7	8	11	4.85235e-05	8.32583e-05	1.71583	4.7551e-05	5.52287e-05	1.16146	0	0	0.415291	0.629676	1	0.751186	1	1
O76094	SRP72	5	3	4	3	2	1.13961e-06	5.56821e-07	0.488607	2.11312e-06	1.30258e-06	0.616427	0	0	0.41621	0.728472	0	0.694765	0	1
Q4VNC1	ATP13A4	5	3	0	0	1	1.2498e-06	8.13106e-07	0.65059	NaN	NaN	NA	0	0	0.41621	NA	0	0.694765	0	1
Q9BT78	COPS4	5	3	3	1	1	2.10373e-06	9.2867e-07	0.44144	2.04026e-06	2.9038e-07	0.142325	0	0	0.41621	0.275281	0	0.694765	0	0.60499
P14854	COX6B1	16	11	4	2	0	3.92566e-05	2.9085e-05	0.740896	1.7361e-05	5.38941e-06	0.310432	0	0	0.416814	0.349245	0	0.175996	0	0.66142
P09110	ACAA1	19	17	18	17	18	2.12133e-05	1.8751e-05	0.883925	3.37606e-05	3.52431e-05	1.04391	0	1	0.416858	0.881621	0	0.60499	0	1
O75695	RP2	6	8	6	2	2	5.90742e-06	9.86559e-06	1.67003	5.95206e-06	1.81103e-06	0.304269	0	0	0.418077	0.116892	1	0.741054	0	0.235116
P05546	SERPIND1	14	14	15	7	5	8.34954e-05	3.89016e-05	0.465913	4.42122e-05	1.77366e-05	0.401168	0	0	0.418571	0.0115714	0	1	0	0.0248417
O00154	ACOT7	2	4	0	1	0	1.47538e-06	2.902e-06	1.96695	NaN	1.44105e-07	NA	0	0	0.420565	NA	1	0.66142	1	1
P08567	PLEK	4	2	0	1	0	2.69431e-06	1.37004e-06	0.508494	NaN	1.31636e-06	NA	0	0	0.420565	NA	0	0.66142	1	1
P20061	TCN1	2	4	3	0	1	3.87275e-06	7.62976e-06	1.97011	6.77894e-06	NaN	NA	0	0	0.420565	NA	1	0.66142	0	0.230769
Q93050	ATP6V0A1	2	4	0	0	0	1.26671e-06	2.40447e-06	1.8982	NaN	NaN	NA	0	0	0.420565	NA	1	0.66142	0	1
Q9UBQ5	EIF3K	2	4	9	12	6	3.03851e-06	5.82174e-06	1.91599	8.3324e-06	1.37504e-05	1.65023	0	0	0.420565	0.0736158	1	0.66142	1	0.527254
Q9P2J5	LARS1	18	13	13	15	6	1.73774e-05	1.31318e-05	0.755682	1.0158e-05	1.25997e-05	1.24038	0	0	0.42226	0.621612	0	0.127386	1	0.731094
P61587	RND3	4	6	2	3	2	5.04462e-06	9.01321e-06	1.78669	1.67941e-06	2.90187e-06	1.72791	0	0	0.423526	0.621115	1	0.716427	1	1
P22307	SCP2	18	16	10	10	4	3.87676e-05	2.8598e-05	0.737678	1.83732e-05	1.87457e-05	1.02027	0	0	0.424122	0.805862	0	0.66142	0	1
P20700	LMNB1	20	18	17	18	15	0.000116129	0.000104147	0.896822	0.000118987	8.27981e-05	0.69586	0	1	0.424862	0.860301	0	0.487179	1	1
P34896	SHMT1	5	8	7	8	8	4.69761e-06	6.90144e-06	1.46914	7.19233e-06	7.08657e-06	0.985295	0	0	0.425867	0.93801	1	0.500603	1	1
Q9Y2V2	CARHSP1	8	5	2	2	2	2.13145e-05	1.62877e-05	0.764159	5.46073e-06	5.49052e-06	1.00545	0	0	0.425867	1	0	0.500603	0	1
P48595	SERPINB10	13	9	12	9	5	3.93694e-05	2.60669e-05	0.662109	4.044e-05	4.77441e-05	1.18062	0	0	0.426982	0.234876	0	0.340644	0	0.527254
P61254,Q9UNX3	RPL26,RPL26L1	7	9	6	5	5	2.356e-05	4.60077e-05	1.95279	1.38814e-05	1.28515e-05	0.925802	0	0	0.427092	0.931511	1	0.747527	0	1
Q9BPY8	HOPX	5	9	1	0	0	1.58589e-05	2.4149e-05	1.52274	1.527e-06	NaN	NA	0	0	0.427263	NA	1	0.320266	0	1
O00232	PSMD12	13	12	15	18	11	1.83953e-05	1.56876e-05	0.852801	2.08416e-05	2.81128e-05	1.34888	0	1	0.428354	0.0492636	0	1	1	0.407484
P01591	JCHAIN	20	20	19	20	16	0.00125032	0.000723074	0.578312	0.000612123	0.000458649	0.749276	0	1	0.429082	0.24227	0	1	1	1
P30041	PRDX6	20	19	20	20	19	0.000392563	0.000342869	0.873413	0.000437966	0.000539191	1.23113	0	1	0.429082	0.25338	0	1	0	1
P62820,P59190	RAB1A,RAB15	20	19	0	0	0	0.000262514	0.000234206	0.892168	NaN	NaN	NA	0	0	0.429082	NA	0	1	0	1
Q9HCE6,O15013	ARHGEF10L,ARHGEF10	10	16	0	0	0	1.6215e-05	2.1432e-05	1.32174	NaN	NaN	NA	0	0	0.43074	NA	1	0.0958456	0	1
Q9H3N1	TMX1	12	9	2	8	3	1.72629e-05	1.28114e-05	0.742133	2.43368e-06	1.33291e-05	5.47694	0	0	0.43119	0.0262084	0	0.527254	1	0.0648332
P09769	FGR	8	10	8	7	3	1.97498e-05	3.12927e-05	1.58445	2.30987e-05	1.28455e-05	0.556113	0	0	0.432457	0.503601	1	0.751186	0	1
P28072	PSMB6	12	10	3	3	3	1.93631e-05	1.57453e-05	0.813157	5.66405e-06	6.2428e-06	1.10218	0	0	0.435284	1	0	0.751186	0	1
Q01082	SPTBN1	16	14	14	11	6	5.39811e-05	4.33733e-05	0.80349	5.32011e-05	4.91725e-05	0.924276	0	0	0.43718	0.248796	0	0.716427	0	0.514476
P11177	PDHB	17	14	12	13	6	2.30775e-05	1.4744e-05	0.638891	1.68108e-05	1.5491e-05	0.921492	0	0	0.43816	0.749284	0	0.450576	1	1
O95573	ACSL3	9	10	8	10	7	6.95304e-06	8.51695e-06	1.22492	6.16276e-06	7.90006e-06	1.2819	0	0	0.438346	0.486349	1	1	1	0.751186
P00750	PLAT	5	3	5	2	0	6.12759e-06	3.56225e-06	0.581345	5.615e-06	4.04597e-06	0.720565	0	0	0.438754	0.297654	0	0.694765	0	0.407484
Q15057	ACAP2	5	3	0	0	0	2.91599e-06	1.77581e-06	0.608989	NaN	NaN	NA	0	0	0.438754	NA	0	0.694765	0	1
Q15436	SEC23A	5	3	6	6	3	3.26986e-06	1.95345e-06	0.597412	4.18583e-06	2.92024e-06	0.697649	0	0	0.438754	0.726076	0	0.694765	0	1
P05154	SERPINA5	4	7	6	2	4	2.44345e-06	2.95616e-06	1.20983	2.52607e-05	2.45716e-06	0.0972721	0	0	0.439229	0.116892	1	0.480115	0	0.235116
P40199	CEACAM6	18	16	17	10	14	0.000157275	0.000122454	0.778597	0.00012697	9.43625e-05	0.743185	0	0	0.439998	0.0671973	0	0.66142	0	0.0407424
P04040	CAT	19	16	15	14	14	0.000319381	0.000311837	0.976381	0.000293545	0.000335731	1.14371	0	0	0.440321	0.671806	0	0.341649	0	1
Q93008,O00507	USP9X,USP9Y	20	17	12	14	11	2.35946e-05	2.01848e-05	0.855485	1.03965e-05	1.21653e-05	1.17014	0	0	0.440664	0.589813	0	0.230769	1	0.741054
Q15691	MAPRE1	7	5	4	1	0	9.31052e-06	5.92725e-06	0.636618	6.94755e-06	1.94081e-06	0.279352	0	0	0.442825	0.164934	0	0.731094	0	0.341649
Q86UP2	KTN1	7	5	1	6	0	1.47849e-05	3.76288e-06	0.254507	8.0039e-06	8.92791e-06	1.11544	0	0	0.442825	0.0575426	0	0.731094	1	0.0914761
P50213	IDH3A	11	11	5	5	1	1.76927e-05	2.32961e-05	1.31671	1.02546e-05	9.8953e-06	0.964959	0	0	0.443678	1	0	1	0	1
Q8TD19	NEK9	6	4	0	1	0	1.86096e-06	1.1488e-06	0.617316	NaN	9.90874e-08	NA	0	0	0.444421	NA	0	0.716427	1	1
O75367	MACROH2A1	20	19	19	19	16	0.000175595	0.000154888	0.882076	0.000126337	0.000127938	1.01267	0	1	0.444964	0.828667	0	1	0	1
P30740,O75830	SERPINB1,SERPINI2	20	20	20	20	19	0.00450849	0.00399818	0.88681	0.0038279	0.00367116	0.959055	0	1	0.444964	0.301253	0	1	0	1
A0A075B6K4	IGLV3-10	4	2	0	0	0	1.38984e-05	7.95792e-06	0.572579	NaN	NaN	NA	0	0	0.446117	NA	0	0.66142	0	1
A0FGR8	ESYT2	2	4	0	0	0	1.22695e-06	2.05033e-06	1.67108	NaN	NaN	NA	0	0	0.446117	NA	1	0.66142	0	1
O43813	LANCL1	2	4	4	4	3	1.01405e-05	7.62565e-06	0.751999	6.85227e-06	4.69612e-06	0.685339	0	0	0.446117	0.953691	1	0.66142	0	1
P10515	DLAT	4	2	1	4	0	9.11217e-06	2.26337e-06	0.24839	3.0722e-06	3.14516e-06	1.02375	0	0	0.446117	0.195486	0	0.66142	1	0.341649
P26885	FKBP2	4	2	0	0	0	3.77096e-06	2.1119e-06	0.560043	NaN	NaN	NA	0	0	0.446117	NA	0	0.66142	0	1
P54840	GYS2	2	4	7	7	9	2.5126e-06	3.31017e-06	1.31743	1.37982e-05	1.23921e-05	0.898091	0	0	0.446117	0.924103	1	0.66142	0	1
Q86Y82	STX12	2	4	0	6	6	7.96649e-07	1.28741e-06	1.61604	NaN	3.75711e-06	NA	0	0	0.446117	NA	1	0.66142	1	0.020196
Q9H871	RMND5A	2	4	1	0	0	9.98597e-07	1.71934e-06	1.72175	1.62302e-07	NaN	NA	0	0	0.446117	NA	1	0.66142	0	1
Q9HD45	TM9SF3	2	4	3	6	2	3.14293e-06	4.5774e-06	1.45641	2.30618e-06	5.26908e-06	2.28477	0	0	0.446117	0.229268	1	0.66142	1	0.450576
Q9UKK9	NUDT5	2	4	1	0	0	1.28412e-06	2.28123e-06	1.7765	8.87241e-07	NaN	NA	0	0	0.446117	NA	1	0.66142	0	1
Q16204	CCDC6	8	6	7	10	10	9.27597e-06	6.4674e-06	0.697221	1.19369e-05	1.47815e-05	1.2383	0	0	0.455516	0.35934	0	0.741054	1	0.523107
Q07020	RPL18	19	14	17	18	17	7.65054e-05	6.24527e-05	0.816318	8.32061e-05	9.49497e-05	1.14114	0	1	0.455765	0.261169	0	0.0914761	1	1
Q15437	SEC23B	18	15	16	18	16	2.57991e-05	2.44226e-05	0.946645	2.3516e-05	2.52316e-05	1.07296	0	1	0.455765	0.578594	0	0.407484	1	0.66142
Q9BV40	VAMP8	11	8	7	8	1	3.1914e-05	2.55136e-05	0.799446	1.64618e-05	1.97186e-05	1.19784	0	0	0.455822	0.697382	0	0.527254	1	1
P07099	EPHX1	19	18	15	17	15	5.43424e-05	4.75285e-05	0.87461	4.22599e-05	4.41259e-05	1.04415	0	1	0.456866	0.355826	0	1	1	0.694765
P29966	MARCKS	15	13	5	7	1	2.12508e-05	1.85625e-05	0.873494	1.63038e-05	2.2165e-05	1.3595	0	0	0.459087	0.570556	0	0.731094	1	0.731094
O75955	FLOT1	12	8	9	8	3	3.56353e-05	2.53766e-05	0.71212	3.37117e-05	2.72587e-05	0.808583	0	0	0.460937	0.752337	0	0.343067	0	1
O00515	LAD1	12	13	7	9	6	9.50432e-06	1.18951e-05	1.25155	6.62312e-06	8.94893e-06	1.35117	0	0	0.461468	0.427092	1	1	1	0.747527
P13473	LAMP2	12	13	6	8	2	3.28154e-05	4.0346e-05	1.22949	1.92839e-05	2.73284e-05	1.41716	0	0	0.461468	0.578403	1	1	1	0.741054
P09497	CLTB	10	7	10	13	8	1.81966e-05	1.27189e-05	0.698972	1.5503e-05	2.51806e-05	1.62424	0	0	0.461546	0.163508	0	0.523107	1	0.523107
P0DP57	SLURP2	3	5	1	2	2	2.232e-06	3.34018e-06	1.4965	9.90007e-07	1.64367e-06	1.66026	0	0	0.461984	0.573704	1	0.694765	1	1
Q0JRZ9	FCHO2	3	5	5	4	1	2.89741e-06	3.42166e-06	1.18094	2.73448e-06	2.76242e-06	1.01022	0	0	0.461984	0.926316	1	0.694765	0	1
Q9ULV4	CORO1C	17	15	0	0	0	3.33988e-05	2.90495e-05	0.869774	NaN	NaN	NA	0	0	0.463408	NA	0	0.694765	0	1
Q8IU89	CERS3	5	8	2	8	3	3.48027e-06	4.52796e-06	1.30104	1.24449e-06	4.8001e-06	3.85709	0	0	0.464608	0.0343108	1	0.500603	1	0.0648332
P27918	CFP	9	5	4	0	0	1.46502e-05	1.2363e-05	0.843877	7.08404e-06	NaN	NA	0	0	0.465162	NA	0	0.320266	0	0.106029
O15533	TAPBP	4	6	4	2	1	7.9932e-06	9.93273e-06	1.24265	6.51109e-06	6.45901e-06	0.992002	0	0	0.465892	0.472531	1	0.716427	0	0.66142
P30419,O60551	NMT1,NMT2	6	4	0	0	0	3.4436e-06	2.28961e-06	0.664887	NaN	NaN	NA	0	0	0.465892	NA	0	0.716427	0	1
P33241	LSP1	10	8	9	5	2	4.70519e-05	3.34401e-05	0.710708	4.34255e-05	2.46538e-05	0.567726	0	0	0.467992	0.252958	0	0.751186	0	0.320266
Q6P4A8	PLBD1	16	17	17	16	15	8.23558e-05	7.23518e-05	0.878527	5.65578e-05	5.00135e-05	0.88429	0	1	0.472315	0.596897	1	1	0	1
Q8N697	SLC15A4	2	4	2	1	2	3.23899e-07	3.91011e-07	1.2072	3.75354e-07	1.55204e-07	0.413486	0	0	0.472531	0.534056	1	0.66142	0	1
Q93077	H2AC6	4	2	0	0	0	1.76807e-05	1.64131e-05	0.928309	NaN	NaN	NA	0	0	0.472531	NA	0	0.66142	0	1
P10909	CLU	12	11	11	7	7	0.000220041	5.61077e-05	0.254987	0.000162952	2.94028e-05	0.180439	0	0	0.472882	0.163845	0	1	0	0.340644
P24158	PRTN3	20	18	18	19	19	0.00234516	0.00191184	0.81523	0.00195341	0.0013345	0.683161	0	1	0.47346	0.323391	0	0.487179	1	1
P11586	MTHFD1	20	19	17	17	11	3.34949e-05	3.02402e-05	0.90283	2.56181e-05	2.30026e-05	0.897903	0	1	0.477691	0.385927	0	1	0	1
P61088,Q5JXB2	UBE2N,UBE2NL	20	19	17	15	12	6.57819e-05	5.70874e-05	0.867828	4.57485e-05	4.52897e-05	0.98997	0	0	0.477691	0.935067	0	1	0	0.694765
P62258	YWHAE	20	20	20	20	19	0.000430629	0.000386762	0.898132	0.000330677	0.000410602	1.2417	0	1	0.477691	0.221065	0	1	0	1
P62805	H4C9	20	20	20	20	19	0.0077187	0.00719879	0.932642	0.00714	0.00630696	0.883327	0	1	0.477691	0.564832	0	1	0	1
P84095	RHOG	14	11	11	4	2	7.10845e-05	5.7431e-05	0.807925	2.25636e-05	1.11072e-05	0.49226	0	0	0.478547	0.0598269	0	0.514476	0	0.0483721
Q92900	UPF1	9	8	1	2	0	4.92655e-06	3.55366e-06	0.721329	8.89363e-07	2.10955e-06	2.37198	0	0	0.480032	0.573704	0	1	1	1
P35527	KRT9	17	15	18	19	18	0.000181736	0.00019204	1.0567	0.00021104	0.000195593	0.926808	0	1	0.480132	0.323391	0	0.694765	1	1
P48643	CCT5	19	17	20	17	17	6.07952e-05	5.36698e-05	0.882797	5.53507e-05	4.82043e-05	0.870888	0	1	0.481662	0.818116	0	0.60499	0	0.230769
O95757	HSPA4L	13	14	10	16	11	2.04722e-05	2.42176e-05	1.18295	1.30689e-05	2.38091e-05	1.82181	0	0	0.482764	0.0260446	1	1	1	0.0958456
P48637	GSS	15	12	13	12	10	2.60861e-05	1.94405e-05	0.745245	2.74574e-05	2.56186e-05	0.933031	0	0	0.482764	0.878521	0	0.500603	0	1
O14617	AP3D1	3	5	1	2	1	1.81654e-06	2.65155e-06	1.45967	3.74486e-07	1.17698e-06	3.14293	0	0	0.485885	0.534056	1	0.694765	1	1
O60832	DKC1	5	3	1	0	0	4.49216e-06	2.91343e-06	0.648557	6.34319e-07	NaN	NA	0	0	0.485885	NA	0	0.694765	0	1
O75746	SLC25A12	5	3	1	1	0	8.79567e-06	1.72491e-06	0.196109	6.10364e-06	1.74478e-06	0.285859	0	0	0.485885	1	0	0.694765	0	1
O95867	LY6G6C	3	5	5	6	3	1.44592e-05	1.59757e-05	1.10488	1.34181e-05	2.73782e-05	2.04039	0	0	0.485885	0.570558	1	0.694765	1	1
P55000	SLURP1	3	5	1	1	2	1.85132e-06	2.78815e-06	1.50604	2.08009e-06	9.12561e-07	0.438713	0	0	0.485885	1	1	0.694765	0	1
Q9Y4L1	HYOU1	10	12	0	0	0	1.3768e-05	1.99099e-05	1.44609	NaN	NaN	NA	0	0	0.487011	NA	1	0.751186	0	1
Q6P1M3	LLGL2	11	9	9	6	4	8.16899e-06	6.03132e-06	0.73832	3.27807e-06	2.43369e-06	0.742416	0	0	0.487724	0.586166	0	0.752371	0	0.514476
Q9UHG3	PCYOX1	15	16	17	18	15	3.98228e-05	3.4579e-05	0.868321	4.61472e-05	6.43967e-05	1.39546	0	1	0.487875	0.0717784	1	1	1	1
P51884	LUM	6	4	5	1	3	1.70868e-05	9.4173e-06	0.551145	1.9406e-05	2.28117e-06	0.11755	0	0	0.487927	0.074256	0	0.716427	0	0.181764
P04844	RPN2	18	17	14	13	15	3.85774e-05	3.67017e-05	0.951379	2.75026e-05	3.2169e-05	1.16967	0	0	0.489927	0.630039	0	1	0	1
P62906	RPL10A	18	18	18	17	12	8.19617e-05	6.85516e-05	0.836386	7.85371e-05	7.69941e-05	0.980352	0	1	0.490131	0.817982	0	1	0	1
P40227	CCT6A	20	17	18	17	18	0.000100147	8.50465e-05	0.849221	5.95598e-05	5.92595e-05	0.994958	0	1	0.490253	0.714724	0	0.230769	0	1
Q8WUF5	PPP1R13L	8	11	4	5	6	1.31602e-05	2.85697e-05	2.17091	3.88749e-06	6.14152e-06	1.57981	0	0	0.491922	0.617502	1	0.527254	1	1
P08865	RPSA	20	19	20	20	19	0.000140479	0.000119882	0.85338	0.000146711	0.000193275	1.31739	0	1	0.494523	0.0304113	0	1	0	1
P17858	PFKL	20	20	18	20	18	0.000173542	0.000154612	0.890917	0.000111019	0.000122894	1.10697	0	1	0.494523	0.228673	0	1	1	0.487179
P28066	PSMA5	20	19	19	18	16	9.09934e-05	8.12273e-05	0.892673	5.93497e-05	6.08103e-05	1.02461	0	1	0.494523	0.674957	0	1	0	1
Q15056	EIF4H	8	6	4	9	13	1.01729e-05	7.80596e-06	0.767328	7.66865e-06	2.09097e-05	2.72665	0	0	0.494771	0.0663094	0	0.741054	1	0.175996
Q8TCJ2	STT3B	15	15	7	6	5	1.22996e-05	1.33318e-05	1.08392	6.53686e-06	6.37506e-06	0.975248	0	0	0.495525	0.883719	0	1	0	1
Q15833	STXBP2	14	12	11	8	7	9.85753e-06	8.00402e-06	0.81197	1.54541e-05	9.08111e-06	0.587617	0	0	0.49819	0.203319	0	0.741054	0	0.527254
P04839,Q9Y5S8	CYBB,NOX1	19	17	17	15	9	0.000271253	0.000252697	0.931594	0.000215437	0.000156982	0.728668	0	0	0.498679	0.447013	0	0.60499	0	0.694765
Q04760	GLO1	19	17	15	15	17	0.000111539	8.96451e-05	0.803713	6.36838e-05	8.15883e-05	1.28115	0	0	0.498679	0.478443	0	0.60499	0	1
O00401	WASL	2	4	1	0	0	3.61675e-07	4.54473e-07	1.25658	2.31682e-07	NaN	NA	0	0	0.499784	NA	1	0.66142	0	1
P41222	PTGDS	4	2	6	3	4	8.51486e-06	6.15989e-06	0.723429	1.35129e-05	3.56922e-06	0.264134	0	0	0.499784	0.25921	0	0.66142	0	0.450576
Q8TDL5	BPIFB1	14	15	18	16	17	0.000483704	0.000451241	0.932887	0.000749369	0.000254441	0.339541	0	1	0.503066	0.0853402	1	1	0	0.66142
Q96AE4	FUBP1	6	9	2	2	1	7.97289e-06	7.55442e-06	0.947514	8.154e-06	6.39094e-06	0.78378	0	0	0.503601	1	1	0.514476	0	1
Q92616	GCN1	7	5	5	7	4	6.39714e-06	4.2484e-06	0.664109	2.93014e-06	5.14894e-06	1.75723	0	0	0.50456	0.462909	0	0.731094	1	0.731094
O75340	PDCD6	16	16	16	17	17	4.95803e-05	4.55387e-05	0.918485	4.2493e-05	4.96014e-05	1.16728	0	1	0.505824	0.335643	0	1	1	1
P56134	ATP5MF	16	16	13	11	10	2.31489e-05	1.85803e-05	0.802644	1.82561e-05	1.149e-05	0.62938	0	0	0.505824	0.300954	0	1	0	0.747527
O60701	UGDH	16	17	17	18	16	4.40887e-05	4.29781e-05	0.974809	3.23595e-05	4.33487e-05	1.3396	0	1	0.506386	0.297223	1	1	1	1
P54578	USP14	18	15	15	13	12	2.17825e-05	1.86511e-05	0.856241	1.74758e-05	1.68573e-05	0.964609	0	0	0.506386	0.978124	0	0.407484	0	0.731094
P62873	GNB1	20	15	20	19	19	6.14548e-05	4.87383e-05	0.793075	0.000184221	0.000194987	1.05844	0	1	0.507107	0.925426	0	0.047124	0	1
P08631	HCK	13	10	7	1	2	2.63923e-05	2.15059e-05	0.814855	5.64148e-06	7.658e-07	0.135744	0	0	0.508292	0.0223608	0	0.523107	0	0.043596
Q9UJ68	MSRA	5	3	3	1	2	4.61504e-06	3.11656e-06	0.675305	4.06966e-06	1.27462e-06	0.313201	0	0	0.510439	0.323604	0	0.694765	0	0.60499
P14735	IDE	6	4	7	9	6	5.68744e-06	3.87155e-06	0.68072	5.72265e-06	7.61072e-06	1.32993	0	0	0.510512	0.625037	0	0.716427	1	0.747527
P06733,P13929	ENO1,ENO3	20	20	0	0	0	0.00282019	0.00258809	0.917701	NaN	NaN	NA	0	0	0.511661	NA	0	1	0	1
P84077,P61204	ARF1,ARF3	20	19	18	20	19	0.000258781	0.000230544	0.890887	0.000183876	0.000208458	1.13369	0	1	0.511661	0.635929	0	1	1	0.487179
O43451,Q2M2H8,P14410	MGAM,MGAM2,SI	14	11	12	5	5	2.01731e-05	1.81806e-05	0.901228	1.48503e-05	7.67701e-06	0.516959	0	0	0.513716	0.0603366	0	0.514476	0	0.053551
Q8N1P7	CRYBG2	9	13	8	7	9	2.07499e-05	2.61879e-05	1.26208	1.42991e-05	1.94014e-05	1.35682	0	0	0.514069	0.98759	1	0.340644	0	1
P31153,Q00266	MAT2A,MAT1A	16	12	9	8	3	2.86386e-05	2.30811e-05	0.805944	2.14707e-05	2.82739e-05	1.31686	0	0	0.519329	0.798374	0	0.300845	0	1
P13861,P31323	PRKAR2A,PRKAR2B	12	9	4	3	2	1.11504e-05	8.16077e-06	0.731881	2.84503e-06	2.29459e-06	0.806527	0	0	0.519551	0.759363	0	0.527254	0	1
P10155	RO60	13	11	5	2	1	1.12983e-05	7.92461e-06	0.701396	3.83044e-06	1.76151e-06	0.459873	0	0	0.520225	0.228262	0	0.747527	0	0.407484
P42167,P42166	TMPO	9	7	9	7	2	1.51007e-05	8.80383e-06	0.583007	1.60507e-05	1.51148e-05	0.941689	0	0	0.52123	0.691302	0	0.747527	0	0.747527
Q7L5L3	GDPD3	9	7	6	11	9	7.66192e-06	5.76291e-06	0.75215	9.54518e-06	1.15196e-05	1.20685	0	0	0.52123	0.272667	0	0.747527	1	0.200287
P42677	RPS27	16	15	0	0	0	6.78735e-05	8.30881e-05	1.22416	NaN	NaN	NA	0	0	0.522637	NA	0	1	0	1
P46977	STT3A	17	14	13	13	9	3.04791e-05	2.45054e-05	0.804008	1.82839e-05	2.71287e-05	1.48375	0	0	0.522637	0.10286	0	0.450576	0	1
Q8IVF2	AHNAK2	6	9	4	5	2	1.11565e-05	1.40366e-05	1.25815	6.17264e-06	4.3957e-06	0.712127	0	0	0.523653	0.867791	1	0.514476	1	1
P06753	TPM3	19	16	14	9	8	9.56312e-05	9.07926e-05	0.949404	7.08539e-05	3.73006e-05	0.526444	0	0	0.524598	0.0335664	0	0.341649	0	0.200287
Q92973	TNPO1	7	5	7	5	5	4.76574e-06	3.75258e-06	0.787409	6.03147e-06	3.36213e-06	0.557431	0	0	0.526103	0.350167	0	0.731094	0	0.731094
Q14498	RBM39	5	8	1	2	2	2.72982e-06	2.84187e-06	1.04104	1.00738e-06	9.93268e-07	0.985988	0	0	0.526227	0.614695	1	0.500603	1	1
O75348,O95670	ATP6V1G1,ATP6V1G2	15	13	8	7	3	1.45796e-05	1.20338e-05	0.825383	8.18034e-06	7.54465e-06	0.922291	0	0	0.528256	0.74394	0	0.731094	0	1
P23526	AHCY	20	20	20	20	19	0.000157854	0.000129567	0.820802	0.000107867	0.000116885	1.08359	0	1	0.529097	0.738062	0	1	0	1
Q13882	PTK6	8	11	9	11	14	1.24546e-05	1.4915e-05	1.19754	1.12353e-05	1.3169e-05	1.17211	0	0	0.529503	0.79469	1	0.527254	1	0.752371
Q8NBQ5	HSD17B11	11	8	9	4	1	1.07419e-05	8.87063e-06	0.825799	1.01784e-05	4.10451e-06	0.403256	0	0	0.529503	0.082066	0	0.527254	0	0.175996
Q14669	TRIP12	4	6	0	1	0	2.53702e-06	3.87699e-06	1.52817	NaN	1.49537e-07	NA	0	0	0.533633	NA	1	0.716427	1	1
Q96S97	MYADM	6	4	1	1	0	1.463e-05	1.10086e-05	0.752472	2.44018e-06	2.62612e-06	1.0762	0	0	0.533633	1	0	0.716427	0	1
P20160	AZU1	19	19	17	18	19	0.00212177	0.00172332	0.812208	0.00147387	0.00112583	0.763863	0	1	0.533823	0.655059	0	1	1	1
P55010	EIF5	9	9	5	8	4	8.5726e-06	6.46411e-06	0.754043	2.47232e-05	3.33452e-05	1.34874	0	0	0.533895	0.305933	0	1	1	0.500603
O00468	AGRN	2	1	1	1	0	1.00345e-05	1.85444e-06	0.184807	7.05863e-07	1.35162e-06	1.91484	0	0	0.534056	1	0	1	0	1
O15327	INPP4B	2	1	2	0	0	1.72006e-06	4.55927e-07	0.265065	1.35217e-06	NaN	NA	0	0	0.534056	NA	0	1	0	0.487179
O15355	PPM1G	2	1	1	0	0	8.78452e-07	2.47408e-07	0.281641	4.26727e-08	NaN	NA	0	0	0.534056	NA	0	1	0	1
O75015	FCGR3B	2	1	0	1	0	2.59426e-06	8.92969e-07	0.344209	NaN	2.71256e-07	NA	0	0	0.534056	NA	0	1	1	1
O75306	NDUFS2	1	2	1	5	0	2.2407e-07	7.40705e-07	3.30569	4.03275e-06	7.13668e-06	1.76968	0	0	0.534056	0.107205	1	1	1	0.181764
P00736	C1R	2	1	2	2	0	2.0348e-06	8.64429e-07	0.424823	2.28341e-06	7.64702e-07	0.334895	0	0	0.534056	0.937886	0	1	0	1
P01602	IGKV1-5	2	1	1	0	0	5.74916e-06	2.2913e-06	0.398546	2.11132e-06	NaN	NA	0	0	0.534056	NA	0	1	0	1
P15291	B4GALT1	2	1	2	1	0	3.28387e-06	1.41815e-06	0.431852	2.72803e-06	1.09624e-06	0.401843	0	0	0.534056	0.573704	0	1	0	1
P55036	PSMD4	2	1	2	2	0	1.65292e-06	4.29328e-07	0.259739	3.79102e-06	3.64486e-06	0.961447	0	0	0.534056	1	0	1	0	1
P80748	IGLV3-21	2	1	12	7	3	3.56412e-06	1.11164e-06	0.311896	4.96246e-05	3.39407e-05	0.68395	0	0	0.534056	0.164793	0	1	0	0.204927
Q04941	PLP2	1	2	14	11	7	5.97055e-07	4.77204e-06	7.99263	3.95259e-05	3.90306e-05	0.987467	0	0	0.534056	0.626738	1	1	0	0.514476
Q07812	BAX	2	1	0	2	1	1.16628e-06	3.97553e-07	0.340873	NaN	1.84824e-06	NA	0	0	0.534056	NA	0	1	1	0.487179
Q14894	CRYM	2	1	1	1	0	5.17225e-06	7.9425e-07	0.15356	7.36368e-07	3.35589e-07	0.455736	0	0	0.534056	1	0	1	0	1
Q4G0F5	VPS26B	2	1	4	4	1	5.28547e-07	1.8139e-07	0.343187	1.67655e-06	1.87444e-06	1.11804	0	0	0.534056	0.953691	0	1	0	1
Q5JSP0	FGD3	2	1	0	0	0	2.68424e-07	9.25989e-08	0.344972	NaN	NaN	NA	0	0	0.534056	NA	0	1	0	1
Q5T5C0	STXBP5	2	1	2	3	1	2.01348e-05	9.45366e-06	0.46952	3.27711e-06	6.52164e-06	1.99006	0	0	0.534056	0.621115	0	1	1	1
Q86VB7	CD163	2	1	0	0	0	5.4837e-06	6.86127e-07	0.125121	NaN	NaN	NA	0	0	0.534056	NA	0	1	0	1
Q8IVQ6	ZDHHC21	1	2	0	4	3	1.24945e-07	5.75121e-07	4.603	NaN	4.74759e-07	NA	0	0	0.534056	NA	1	1	1	0.106029
Q8N339,P80297,P04732,P02795,P13640	MT1M,MT1X,MT1E,MT2A,MT1G	2	1	0	1	0	3.51333e-06	3.4949e-07	0.0994752	NaN	9.23984e-07	NA	0	0	0.534056	NA	0	1	1	1
Q92506	HSD17B8	2	1	0	0	0	2.98078e-06	1.1654e-06	0.39097	NaN	NaN	NA	0	0	0.534056	NA	0	1	0	1
Q96A65	EXOC4	2	1	3	1	0	1.08747e-06	4.7877e-07	0.440261	1.71976e-06	9.67053e-07	0.562318	0	0	0.534056	0.349723	0	1	0	0.60499
Q96CM8	ACSF2	2	1	0	0	0	4.44593e-06	1.26195e-06	0.283844	NaN	NaN	NA	0	0	0.534056	NA	0	1	0	1
Q9BS40	LXN	2	1	0	0	0	4.51561e-06	1.45046e-06	0.32121	NaN	NaN	NA	0	0	0.534056	NA	0	1	0	1
Q9H1E3	NUCKS1	2	1	0	0	0	5.47238e-06	1.67016e-06	0.305198	NaN	NaN	NA	0	0	0.534056	NA	0	1	0	1
Q9NXG2	THUMPD1	2	1	1	1	0	1.89293e-06	5.09551e-07	0.269187	1.58285e-06	7.53031e-07	0.475743	0	0	0.534056	1	0	1	0	1
Q9P0J1	PDP1	2	1	0	1	0	7.98865e-07	1.21468e-07	0.152051	NaN	8.89796e-07	NA	0	0	0.534056	NA	0	1	1	1
Q9GZP4	PITHD1	6	8	5	4	10	1.38491e-05	1.8399e-05	1.32854	1.21792e-05	1.16091e-05	0.953187	0	0	0.535765	0.809982	1	0.741054	0	1
Q6ZT62,Q9Y3L3,P25989,P25882,P25881,P0C6L8,P0C6L7,P0C6L5	BARGIN,SH3BP1	10	11	0	0	0	6.55425e-06	7.77646e-06	1.18647	NaN	NaN	NA	0	0	0.538281	NA	1	1	0	1
Q8NC51	SERBP1	13	11	13	11	11	1.56351e-05	1.23127e-05	0.787503	2.0985e-05	1.9087e-05	0.909553	0	0	0.538527	0.634602	0	0.747527	0	0.747527
Q96HC4	PDLIM5	16	17	15	17	12	6.09563e-05	4.92097e-05	0.807295	3.73431e-05	4.67974e-05	1.25317	0	1	0.541708	0.328241	1	1	1	0.694765
Q92841	DDX17	20	15	18	17	11	6.66392e-05	4.67026e-05	0.700828	4.82297e-05	4.68953e-05	0.972332	0	1	0.542393	0.797011	0	0.047124	0	1
Q9NZ01	TECR	18	18	16	16	15	5.92151e-05	5.35644e-05	0.904573	4.95967e-05	5.76892e-05	1.16317	0	1	0.542582	0.5593	0	1	0	1
P27105	STOM	19	18	17	16	15	0.000402715	0.000389203	0.966446	0.000331344	0.000307961	0.929429	0	1	0.542696	0.472315	0	1	0	1
P61978	HNRNPK	19	18	20	20	19	0.000161269	0.000137402	0.852009	0.000142101	0.000165338	1.16352	0	1	0.542696	0.0809763	0	1	0	1
Q13231	CHIT1	10	8	9	4	4	3.32431e-05	3.09238e-05	0.930232	5.20939e-05	8.79793e-06	0.168886	0	0	0.543678	0.053134	0	0.751186	0	0.175996
P02751	FN1	12	11	12	7	6	4.61988e-05	5.67831e-05	1.2291	0.000136948	3.92432e-05	0.286557	0	0	0.545045	0.0984661	0	1	0	0.204927
Q9UM07	PADI4	13	10	13	13	8	0.000139466	0.00011918	0.854545	0.000151733	0.000139327	0.918235	0	0	0.545045	0.698718	0	0.523107	0	1
P22695	UQCRC2	20	19	19	19	13	0.000150426	0.000121644	0.808662	0.000116915	0.00013866	1.18599	0	1	0.546823	0.159525	0	1	0	1
P50570,Q9UQ16,Q05193	DNM2,DNM3,DNM1	20	19	0	0	0	5.91165e-05	5.31357e-05	0.89883	NaN	NaN	NA	0	0	0.546823	NA	0	1	0	1
P51149	RAB7A	20	20	20	19	19	0.000172844	0.000162244	0.938676	0.000105286	8.93941e-05	0.84906	0	1	0.546823	0.314084	0	1	0	1
Q96G03	PGM2	20	19	19	20	19	0.000153804	0.000132798	0.863419	8.84264e-05	0.000125973	1.4246	0	1	0.546823	0.0112068	0	1	1	1
Q00765	REEP5	8	5	2	2	2	1.50469e-05	1.25558e-05	0.834447	4.36607e-06	3.46676e-06	0.794022	0	0	0.547657	0.979277	0	0.500603	0	1
P30038	ALDH4A1	12	12	3	5	0	1.72256e-05	1.86527e-05	1.08285	6.45275e-06	7.59516e-06	1.17704	0	0	0.547798	0.510439	0	1	1	0.694765
P40763	STAT3	17	15	11	11	6	2.66768e-05	2.79598e-05	1.0481	2.21076e-05	1.8249e-05	0.825462	0	0	0.5502	1	0	0.694765	0	1
O14745	SLC9A3R1	19	17	11	16	9	4.86671e-05	4.21728e-05	0.866555	2.64976e-05	4.14557e-05	1.56451	0	0	0.551589	0.242092	0	0.60499	1	0.175996
Q9BQR3	PRSS27	14	13	6	8	5	5.7547e-05	4.69968e-05	0.816669	1.43556e-05	2.54752e-05	1.77458	0	0	0.554006	0.259609	0	1	1	0.741054
P06310,A0A075B6S6	IGKV2-30,IGKV2D-30	3	2	10	4	5	5.49753e-05	2.2726e-05	0.413386	0.000175	6.63259e-05	0.379006	0	0	0.556252	0.0405383	0	1	0	0.0958456
P38117	ETFB	15	14	7	6	2	3.97984e-05	2.68476e-05	0.674588	1.77324e-05	1.94298e-05	1.09572	0	0	0.556752	0.987034	0	1	0	1
P07948	LYN	12	9	13	8	5	1.25187e-05	1.05139e-05	0.839852	2.38645e-05	1.4825e-05	0.621214	0	0	0.557345	0.140446	0	0.527254	0	0.204927
P06331,P01825,P0DP08,P0DP06,A0A0C4DH41,P01824	IGHV4-34,IGHV4-59,IGHV4-38-2,IGHV4-30-4,IGHV4-61,IGHV4-39	9	8	0	0	0	9.66498e-05	7.03518e-05	0.727904	NaN	NaN	NA	0	0	0.55785	NA	0	1	0	1
O15254	ACOX3	16	15	18	16	18	1.93e-05	1.51728e-05	0.786154	1.49485e-05	1.55427e-05	1.03975	0	1	0.55863	0.838971	0	1	0	0.66142
Q9Y2A7	NCKAP1	19	16	17	18	17	5.53491e-05	4.89551e-05	0.884479	5.62172e-05	6.81946e-05	1.21306	0	1	0.560484	0.489927	0	0.341649	1	1
P19971	TYMP	20	18	16	19	19	0.000170604	0.000122041	0.715344	0.000117459	0.000158427	1.34879	0	1	0.560833	0.714724	0	0.487179	1	0.341649
Q7L1Q6	BZW1	20	18	16	19	12	4.26124e-05	3.72698e-05	0.874622	2.42064e-05	3.31826e-05	1.37082	0	1	0.560833	0.0636431	0	0.487179	1	0.341649
P02042,P02100	HBD,HBE1	7	9	0	0	0	6.06256e-05	0.000115065	1.89796	NaN	NaN	NA	0	0	0.561672	NA	1	0.747527	0	1
Q15080	NCF4	13	10	11	6	4	4.61626e-05	4.75605e-05	1.03028	4.62042e-05	1.70238e-05	0.368448	0	0	0.563904	0.0737492	0	0.523107	0	0.200287
O75369	FLNB	20	20	20	20	19	0.000274149	0.000206548	0.753416	0.000363233	0.000520391	1.43266	0	1	0.564832	0.0283084	0	1	0	1
P11413	G6PD	20	19	20	20	17	0.000343982	0.000328173	0.95404	0.000397136	0.000268771	0.676773	0	1	0.564832	0.141705	0	1	0	1
P29401	TKT	20	20	20	20	19	0.0012134	0.00120438	0.992564	0.00127211	0.00110374	0.867644	0	1	0.564832	0.477691	0	1	0	1
Q7L2H7	EIF3M	10	9	11	9	10	1.10988e-05	9.11481e-06	0.821246	1.14283e-05	9.47095e-06	0.828725	0	0	0.568491	0.506038	0	1	0	0.752371
P20339	RAB5A	14	11	13	11	14	1.27438e-05	1.04579e-05	0.820624	1.12563e-05	1.09471e-05	0.972536	0	0	0.568886	0.93316	0	0.514476	0	0.747527
Q13011	ECH1	11	14	10	12	9	2.20183e-05	2.41938e-05	1.0988	2.42714e-05	2.94438e-05	1.21311	0	0	0.568886	0.504963	1	0.514476	1	0.751186
Q92896	GLG1	6	7	0	1	0	4.308e-06	6.03298e-06	1.40041	NaN	9.9519e-07	NA	0	0	0.56951	NA	1	1	1	1
P52565	ARHGDIA	19	19	19	16	12	7.97544e-05	7.51713e-05	0.942535	6.34249e-05	5.51724e-05	0.869885	0	1	0.569982	0.735029	0	1	0	0.341649
P61626	LYZ	19	19	18	18	19	0.00175538	0.00174557	0.994412	0.00143865	0.00121364	0.843595	0	1	0.569982	0.818066	0	1	0	1
P05204,Q15651	HMGN2,HMGN3	7	5	5	5	1	1.40652e-05	1.19923e-05	0.852621	3.03814e-05	2.73686e-05	0.900833	0	0	0.570556	0.971625	0	0.731094	0	1
P80511	S100A12	7	5	7	4	2	0.00011261	0.000114773	1.01921	7.07505e-05	5.99805e-05	0.847775	0	0	0.570556	0.278856	0	0.731094	0	0.480115
P51692	STAT5B	6	5	7	3	1	1.7528e-06	1.30468e-06	0.744341	2.17236e-06	5.98531e-07	0.275521	0	0	0.570558	0.109457	0	1	0	0.273343
L0R6Q1	SLC35A4	2	1	0	0	0	8.28845e-07	2.65645e-07	0.320501	NaN	NaN	NA	0	0	0.573704	NA	0	1	0	1
O14735	CDIPT	1	2	1	1	1	1.68771e-06	2.70382e-06	1.60207	1.94921e-06	2.35362e-06	1.20747	0	0	0.573704	1	1	1	0	1
O15393	TMPRSS2	2	1	0	0	0	1.30134e-06	7.56372e-07	0.581224	NaN	NaN	NA	0	0	0.573704	NA	0	1	0	1
O43768,P56211	ENSA,ARPP19	1	2	1	0	0	7.03317e-07	1.98066e-06	2.81616	4.67282e-07	NaN	NA	0	0	0.573704	NA	1	1	0	1
O60313	OPA1	2	1	1	2	0	2.05913e-06	7.64773e-07	0.371406	1.73461e-06	1.45083e-06	0.836405	0	0	0.573704	0.614695	0	1	1	1
P05165	PCCA	2	1	1	1	0	5.94393e-06	2.47889e-06	0.417046	3.71008e-06	5.6445e-06	1.5214	0	0	0.573704	1	0	1	0	1
P17927	CR1	1	2	0	1	0	2.15434e-07	4.92373e-07	2.28549	NaN	4.36382e-07	NA	0	0	0.573704	NA	1	1	1	1
P21589	NT5E	2	1	0	0	0	3.64369e-06	2.07347e-06	0.569057	NaN	NaN	NA	0	0	0.573704	NA	0	1	0	1
P27694	RPA1	2	1	0	1	0	2.32418e-06	8.72176e-07	0.375261	NaN	2.52364e-07	NA	0	0	0.573704	NA	0	1	1	1
P36915	GNL1	2	1	1	1	0	3.28557e-07	1.7369e-07	0.528644	2.56904e-07	1.40941e-07	0.548614	0	0	0.573704	1	0	1	0	1
P46937	YAP1	2	1	0	0	0	1.90945e-06	8.49591e-07	0.444941	NaN	NaN	NA	0	0	0.573704	NA	0	1	0	1
P49862	KLK7	1	2	0	1	0	2.19928e-06	4.42595e-06	2.01246	NaN	1.91114e-06	NA	0	0	0.573704	NA	1	1	1	1
P54709	ATP1B3	2	1	1	2	0	4.87391e-06	2.8416e-06	0.583023	9.69409e-06	6.77973e-06	0.699367	0	0	0.573704	0.614695	0	1	1	1
P60510	PPP4C	1	2	0	1	2	6.31029e-07	1.03039e-06	1.63287	NaN	5.20963e-07	NA	0	0	0.573704	NA	1	1	1	1
Q07021	C1QBP	2	1	2	2	0	1.81092e-06	1.12616e-06	0.621872	4.10387e-06	1.84795e-06	0.450295	0	0	0.573704	1	0	1	0	1
Q12913	PTPRJ	2	1	1	1	0	2.0045e-06	9.18838e-07	0.458388	1.29694e-06	1.725e-06	1.33006	0	0	0.573704	1	0	1	0	1
Q15041	ARL6IP1	2	1	0	0	0	2.16473e-06	9.45181e-07	0.436627	NaN	NaN	NA	0	0	0.573704	NA	0	1	0	1
Q15847	ADIRF	2	1	1	0	0	3.22337e-06	1.24611e-06	0.386586	1.39788e-06	NaN	NA	0	0	0.573704	NA	0	1	0	1
Q16799,Q5IS59	RTN1	2	1	1	0	0	2.24108e-06	8.68835e-07	0.387685	4.79809e-07	NaN	NA	0	0	0.573704	NA	0	1	0	1
Q2TAY7	SMU1	2	1	1	1	0	3.2226e-06	1.09552e-06	0.33995	1.21928e-06	1.37831e-06	1.13043	0	0	0.573704	1	0	1	0	1
Q5T6V5	C9orf64	2	1	1	0	0	1.24534e-06	3.11697e-07	0.250291	2.6249e-07	NaN	NA	0	0	0.573704	NA	0	1	0	1
Q86Y34	ADGRG3	1	2	0	0	0	5.09409e-07	9.70801e-07	1.90574	NaN	NaN	NA	0	0	0.573704	NA	1	1	0	1
Q8N283	ANKRD35	1	2	2	0	3	4.42153e-07	9.76335e-07	2.20814	1.5923e-06	NaN	NA	0	0	0.573704	NA	1	1	0	0.487179
Q8N766	EMC1	2	1	1	0	0	2.64063e-07	1.288e-07	0.487763	1.30061e-07	NaN	NA	0	0	0.573704	NA	0	1	0	1
Q8TBB1	LNX1	2	1	0	0	0	1.3399e-06	5.99856e-07	0.447687	NaN	NaN	NA	0	0	0.573704	NA	0	1	0	1
Q9H3P7	ACBD3	1	2	0	1	0	5.16627e-07	1.71688e-06	3.32325	NaN	1.41181e-06	NA	0	0	0.573704	NA	1	1	1	1
Q9H8P0	SRD5A3	2	1	0	0	0	6.50694e-07	1.8727e-07	0.2878	NaN	NaN	NA	0	0	0.573704	NA	0	1	0	1
Q9NX02	NLRP2	1	2	0	0	0	7.24022e-07	2.041e-06	2.81898	NaN	NaN	NA	0	0	0.573704	NA	1	1	0	1
Q9UQ35	SRRM2	2	1	1	1	0	2.69033e-06	1.48722e-06	0.552802	2.66384e-06	2.9681e-06	1.11422	0	0	0.573704	1	0	1	0	1
Q9Y223	GNE	2	1	1	0	0	1.80428e-06	7.4716e-07	0.414103	8.85911e-07	NaN	NA	0	0	0.573704	NA	0	1	0	1
P10153	RNASE2	13	11	10	9	8	6.58133e-05	5.26194e-05	0.799525	6.92407e-05	6.36258e-05	0.918908	0	0	0.576074	0.548826	0	0.747527	0	1
P28482	MAPK1	13	11	14	12	5	1.64443e-05	1.35434e-05	0.823588	3.46445e-05	4.01989e-05	1.16033	0	0	0.576074	0.648269	0	0.747527	0	0.741054
Q99714	HSD17B10	16	17	9	12	6	3.80674e-05	3.51241e-05	0.922681	1.43897e-05	1.48574e-05	1.0325	0	0	0.578218	0.699184	1	1	1	0.527254
P06731,P40198	CEACAM5,CEACAM3	18	20	0	0	0	0.000597	0.000564605	0.945737	NaN	NaN	NA	0	0	0.579201	NA	1	0.487179	0	1
P08575	PTPRC	15	11	11	9	5	5.59171e-05	6.47083e-05	1.15722	6.97466e-05	4.44512e-05	0.637324	0	0	0.580311	0.401748	0	0.320266	0	0.752371
Q03426	MVK	4	3	1	2	0	3.20476e-06	1.79419e-06	0.559852	8.48466e-07	2.18162e-06	2.57125	0	0	0.581379	0.534056	0	1	1	1
O75643	SNRNP200	4	6	4	3	1	5.51056e-06	4.85959e-06	0.881869	4.86977e-06	3.86317e-06	0.793297	0	0	0.581407	0.728472	1	0.716427	0	1
P08637	FCGR3A	4	6	5	0	0	1.23952e-05	1.57145e-05	1.26779	9.96464e-06	NaN	NA	0	0	0.581407	NA	1	0.716427	0	0.047124
P55060	CSE1L	11	12	12	13	13	0.00017966	0.000254721	1.4178	9.9292e-05	8.18786e-05	0.824625	0	0	0.583072	0.96675	1	1	1	1
P09960	LTA4H	20	20	20	20	19	0.000667014	0.000639647	0.958971	0.000536411	0.000368725	0.687392	0	1	0.583114	0.0910861	0	1	0	1
P11142	HSPA8	20	20	20	20	19	0.00182052	0.00174159	0.956646	0.0018536	0.00197654	1.06633	0	1	0.583114	0.314084	0	1	0	1
P35579	MYH9	20	20	20	20	19	0.00359017	0.00344169	0.958643	0.00321348	0.00308025	0.958539	0	1	0.583114	0.678306	0	1	0	1
P36952	SERPINB5	20	20	20	20	19	0.000635021	0.000570724	0.898747	0.000500065	0.0005415	1.08286	0	1	0.583114	0.511661	0	1	0	1
Q96FW1	OTUB1	20	19	20	20	19	9.48331e-05	8.63801e-05	0.910865	6.50235e-05	8.16446e-05	1.25562	0	1	0.583114	0.0762662	0	1	0	1
Q10588	BST1	15	13	13	9	7	5.00615e-05	4.21761e-05	0.842486	5.67103e-05	3.0302e-05	0.53433	0	0	0.583411	0.156041	0	0.731094	0	0.340644
Q9Y277	VDAC3	8	10	4	6	0	2.26769e-05	2.04913e-05	0.903621	8.55425e-06	1.70135e-05	1.98889	0	0	0.583681	0.444421	1	0.751186	1	0.716427
O75351,Q6PIW4	VPS4B,FIGNL1	13	17	13	15	15	5.49516e-05	6.36527e-05	1.15834	3.30092e-05	4.21031e-05	1.27549	0	0	0.58559	0.323576	1	0.273343	1	0.731094
Q03252	LMNB2	8	7	5	2	2	1.54998e-05	9.57551e-06	0.617781	2.78591e-05	3.53115e-05	1.2675	0	0	0.586166	0.228262	0	1	0	0.407484
P43686	PSMC4	3	5	1	1	0	5.81352e-06	7.6239e-06	1.31141	1.20135e-06	7.72421e-07	0.642959	0	0	0.587812	1	1	0.694765	0	1
O43639	NCK2	3	2	0	1	0	1.70676e-06	6.94972e-07	0.407188	NaN	5.41568e-07	NA	0	0	0.58827	NA	0	1	1	1
Q8WUY1	THEM6	3	2	2	2	0	3.47621e-06	1.54838e-06	0.445422	2.14793e-06	4.26795e-06	1.98701	0	0	0.58827	0.979277	0	1	0	1
Q8WXH0	SYNE2	3	2	0	0	0	2.00566e-06	4.71606e-07	0.235137	NaN	NaN	NA	0	0	0.58827	NA	0	1	0	1
Q9H9S4	CAB39L	3	2	1	1	0	2.05656e-06	6.96295e-07	0.338573	7.61693e-07	9.40017e-07	1.23411	0	0	0.58827	1	0	1	0	1
Q12905	ILF2	14	12	10	7	4	1.74932e-05	1.22276e-05	0.698993	1.53119e-05	1.27693e-05	0.833942	0	0	0.589813	0.663002	0	0.741054	0	0.523107
P49207	RPL34	15	12	6	11	8	3.101e-05	2.47745e-05	0.79892	2.34535e-05	4.49381e-05	1.91605	0	0	0.591461	0.0895065	0	0.500603	1	0.200287
P0C0L4	C4A	5	4	2	0	0	5.93802e-06	3.23429e-06	0.544674	1.54187e-06	NaN	NA	0	0	0.591691	NA	0	1	0	0.487179
P46976	GYG1	8	5	9	6	3	1.69633e-05	1.88846e-05	1.11326	3.04322e-05	1.78327e-05	0.585981	0	0	0.59177	0.283161	0	0.500603	0	0.514476
P24534	EEF1B2	14	16	12	8	11	2.7493e-05	2.95683e-05	1.07549	2.2479e-05	1.74302e-05	0.7754	0	0	0.594998	0.393682	1	0.716427	0	0.343067
P28799	GRN	16	14	19	19	16	9.88273e-05	0.000110157	1.11464	0.000183952	0.000179744	0.977124	0	1	0.594998	0.956853	0	0.716427	0	1
Q0VD83	APOBR	13	11	9	8	5	1.66685e-05	1.44313e-05	0.865782	2.39185e-05	1.78499e-05	0.746283	0	0	0.595299	0.61998	0	0.747527	0	1
Q9UBI6	GNG12	15	16	15	17	18	4.89762e-05	4.58915e-05	0.937017	5.37684e-05	5.75754e-05	1.0708	0	1	0.595785	0.744509	1	1	1	0.694765
O00743	PPP6C	11	10	2	2	0	7.64173e-06	6.34623e-06	0.83047	1.93564e-06	1.36152e-06	0.703393	0	0	0.596429	1	0	1	0	1
Q9UBD6	RHCG	16	17	17	15	18	0.000475858	0.00045697	0.960309	0.000336164	0.000249012	0.740745	0	0	0.596897	0.89199	1	1	0	0.694765
O00303	EIF3F	18	17	13	17	16	3.01569e-05	2.74032e-05	0.908686	2.508e-05	3.56288e-05	1.4206	0	0	0.597519	0.164421	0	1	1	0.273343
P22392,O60361	NME2,NME2P1	20	16	8	4	1	0.000201774	0.000162372	0.804723	2.10132e-05	1.18634e-05	0.56457	0	0	0.597691	0.249671	0	0.106029	0	0.300845
O75533	SF3B1	9	8	3	3	2	4.08266e-06	3.27811e-06	0.802936	4.04136e-06	4.40236e-06	1.08933	0	0	0.598936	0.965273	0	1	0	1
Q5T0Z8	C6orf132	8	9	5	7	9	8.75269e-06	1.14783e-05	1.3114	5.33494e-06	1.01606e-05	1.90454	0	0	0.598936	0.350167	1	1	1	0.731094
Q10472,Q8IUC8	GALNT1,GALNT13	8	6	4	9	1	1.08789e-05	1.09503e-05	1.00656	5.38222e-06	1.53035e-05	2.84334	0	0	0.600304	0.0663094	0	0.741054	1	0.175996
P16152	CBR1	20	20	20	20	19	0.000341854	0.000330791	0.967636	0.000248298	0.000322478	1.29875	0	1	0.601662	0.0046812	0	1	0	1
P53621	COPA	20	20	20	20	18	0.000116002	0.000108238	0.93307	0.000137855	0.000153389	1.11268	0	1	0.601662	0.444964	0	1	0	1
P61020	RAB5B	20	20	20	18	18	0.000137441	0.000135357	0.984835	0.000117843	0.00011351	0.963228	0	1	0.601662	0.694877	0	1	0	0.487179
P62826	RAN	20	19	19	19	18	0.000216123	0.000202116	0.935187	0.000176078	0.000172763	0.981177	0	1	0.601662	1	0	1	0	1
Q15084	PDIA6	20	20	19	19	18	7.58829e-05	7.10092e-05	0.935774	8.94824e-05	8.56986e-05	0.957715	0	1	0.601662	0.828667	0	1	0	1
Q99832	CCT7	20	20	20	20	19	0.000110446	9.58207e-05	0.867578	7.58742e-05	0.000102345	1.34887	0	1	0.601662	0.0350107	0	1	0	1
Q5TAA0	TTC22	9	11	9	10	13	1.54732e-05	2.15538e-05	1.39298	8.76607e-06	1.46382e-05	1.66987	0	0	0.60275	0.312999	1	0.752371	1	1
P22102	GART	9	7	6	3	1	7.80425e-06	6.20527e-06	0.795114	4.5985e-06	1.40112e-06	0.30469	0	0	0.603573	0.229268	0	0.747527	0	0.450576
Q6ZRV2	FAM83H	13	17	15	17	19	2.08421e-05	2.55598e-05	1.22636	2.21689e-05	3.11801e-05	1.40648	0	1	0.604475	0.174507	1	0.273343	1	0.694765
Q9UL25	RAB21	14	10	9	5	2	2.13952e-05	1.8504e-05	0.864866	9.52161e-06	5.85908e-06	0.615346	0	0	0.605021	0.294672	0	0.333213	0	0.320266
P07738	BPGM	6	4	0	1	4	9.19295e-06	7.5487e-06	0.82114	NaN	1.35344e-06	NA	0	0	0.606021	NA	0	0.716427	1	1
Q8IX19	MCEMP1	6	4	6	5	3	1.79293e-05	1.87095e-05	1.04352	1.90435e-05	1.39242e-05	0.731175	0	0	0.606021	0.770126	0	0.716427	0	1
Q8TEX9	IPO4	4	6	3	4	1	2.61621e-07	3.61882e-07	1.38323	3.38995e-07	3.52053e-07	1.03852	0	0	0.606021	0.759363	1	0.716427	1	1
P04004	VTN	13	12	16	10	10	0.000133454	9.15004e-05	0.685631	9.20439e-05	4.95157e-05	0.537957	0	0	0.607173	0.0180896	0	1	0	0.0958456
P07437,A6NNZ2,Q9H4B7	TUBB,TUBB8B,TUBB1	19	19	0	0	0	0.000168736	0.000160811	0.953035	NaN	NaN	NA	0	0	0.607269	NA	0	1	0	1
O14744	PRMT5	4	3	3	2	2	3.73975e-06	2.00981e-06	0.537418	1.60858e-06	7.97301e-07	0.495655	0	0	0.609681	0.621115	0	1	0	1
Q99685	MGLL	3	4	7	7	8	8.66057e-07	1.37387e-06	1.58635	5.31775e-06	5.26861e-06	0.990758	0	0	0.609681	0.848892	1	1	0	1
Q9UQE7	SMC3	4	3	1	2	0	1.29209e-06	7.02366e-07	0.54359	6.66499e-07	1.15667e-06	1.73545	0	0	0.609681	0.614695	0	1	1	1
Q13464,O75116	ROCK1,ROCK2	7	7	0	0	0	4.37087e-06	3.05956e-06	0.69999	NaN	NaN	NA	0	0	0.611393	NA	0	1	0	1
O00748,Q5XG92	CES2,CES4A	8	12	0	0	0	2.26252e-05	2.43967e-05	1.0783	NaN	NaN	NA	0	0	0.612862	NA	1	0.343067	0	1
Q8WVM8	SCFD1	10	10	11	9	10	9.29001e-06	7.5496e-06	0.812659	8.6431e-06	7.20413e-06	0.833512	0	0	0.612862	0.543724	0	1	0	0.752371
Q08170	SRSF4	7	6	5	6	1	1.16281e-05	5.7843e-06	0.497441	1.05214e-05	1.21496e-05	1.15475	0	0	0.614422	0.796537	0	1	1	1
O15371	EIF3D	2	1	0	1	0	2.9077e-06	2.24238e-06	0.771187	NaN	3.40426e-06	NA	0	0	0.614695	NA	0	1	1	1
O95292	VAPB	1	2	1	0	0	1.8751e-06	3.04613e-06	1.62452	7.95054e-07	NaN	NA	0	0	0.614695	NA	1	1	0	1
P07288	KLK3	1	2	1	1	0	3.51146e-06	3.32185e-06	0.946004	0.000188114	6.86973e-05	0.365189	0	0	0.614695	1	1	1	0	1
P16949	STMN1	2	1	1	1	0	1.73059e-06	1.37171e-06	0.792628	7.04762e-07	6.77485e-07	0.961297	0	0	0.614695	1	0	1	0	1
P18827	SDC1	2	1	1	1	0	3.69765e-06	3.98444e-06	1.07756	7.07415e-06	6.11437e-06	0.864326	0	0	0.614695	1	0	1	0	1
P22694	PRKACB	1	2	2	0	0	2.8297e-07	3.974e-07	1.40439	1.03366e-06	NaN	NA	0	0	0.614695	NA	1	1	0	0.487179
P42574,Q5IS54,Q5IS99	CASP3	1	2	0	0	0	1.05237e-06	1.50211e-06	1.42735	NaN	NaN	NA	0	0	0.614695	NA	1	1	0	1
P43251	BTD	2	1	1	0	0	1.13285e-06	6.33501e-07	0.559207	4.7499e-07	NaN	NA	0	0	0.614695	NA	0	1	0	1
P46060	RANGAP1	1	2	0	0	1	9.82835e-07	9.90876e-07	1.00818	NaN	NaN	NA	0	0	0.614695	NA	1	1	0	1
P51809	VAMP7	1	2	1	0	0	5.27495e-07	1.02404e-06	1.94132	1.86674e-07	NaN	NA	0	0	0.614695	NA	1	1	0	1
P62847	RPS24	2	1	2	1	1	1.78079e-06	1.92396e-06	1.0804	3.91925e-06	5.63164e-07	0.143692	0	0	0.614695	0.573704	0	1	0	1
Q13085,O00763	ACACA,ACACB	1	2	0	3	2	1.66921e-07	2.01021e-07	1.20429	NaN	9.61452e-07	NA	0	0	0.614695	NA	1	1	1	0.230769
Q14693,Q92539	LPIN1,LPIN2	2	1	0	1	0	2.94469e-07	4.36786e-07	1.4833	NaN	3.80564e-07	NA	0	0	0.614695	NA	0	1	1	1
Q15418	RPS6KA1	2	1	1	0	0	1.93741e-07	9.82827e-08	0.507289	2.2089e-07	NaN	NA	0	0	0.614695	NA	0	1	0	1
Q5T5P2	KIAA1217	1	2	1	1	0	1.49199e-06	1.3416e-06	0.899203	3.43643e-06	1.44566e-06	0.420687	0	0	0.614695	1	1	1	0	1
Q5VSL9,Q9ULQ0	STRIP1,STRIP2	2	1	0	1	0	3.30453e-07	2.07903e-07	0.629145	NaN	1.61996e-07	NA	0	0	0.614695	NA	0	1	1	1
Q6DKJ4	NXN	2	1	2	0	0	1.17469e-06	8.80238e-07	0.749337	1.08612e-06	NaN	NA	0	0	0.614695	NA	0	1	0	0.487179
Q8N4U5	TCP11L2	1	2	0	2	0	8.25458e-07	7.84652e-07	0.950566	NaN	2.42484e-06	NA	0	0	0.614695	NA	1	1	1	0.487179
Q8NBX0	SCCPDH	1	2	0	1	0	6.11624e-06	2.54887e-06	0.416738	NaN	3.84929e-06	NA	0	0	0.614695	NA	1	1	1	1
Q96PP9	GBP4	1	2	0	0	0	1.93779e-06	2.93711e-06	1.5157	NaN	NaN	NA	0	0	0.614695	NA	1	1	0	1
Q9BRR9	ARHGAP9	1	2	0	1	0	8.90755e-07	8.21115e-07	0.921818	NaN	3.71718e-07	NA	0	0	0.614695	NA	1	1	1	1
Q9BUP3	HTATIP2	2	1	1	0	0	1.49631e-06	1.17982e-06	0.788485	4.2291e-07	NaN	NA	0	0	0.614695	NA	0	1	0	1
Q9NUU7,Q9UHL0	DDX19A,DDX25	1	2	0	0	0	7.45154e-07	6.55971e-07	0.880316	NaN	NaN	NA	0	0	0.614695	NA	1	1	0	1
Q9P0V9	SEPTIN10	2	1	0	0	0	1.65265e-06	1.05765e-06	0.639974	NaN	NaN	NA	0	0	0.614695	NA	0	1	0	1
Q9UEY8	ADD3	1	2	1	2	0	2.02759e-06	2.20159e-06	1.08582	2.80191e-06	2.6258e-06	0.937145	0	0	0.614695	0.614695	1	1	1	1
Q9UHL4	DPP7	2	1	1	0	0	4.22942e-07	1.18201e-06	2.79473	1.07426e-06	NaN	NA	0	0	0.614695	NA	0	1	0	1
Q9ULC4	MCTS1	2	1	1	0	0	6.24923e-07	7.86606e-07	1.25872	4.45739e-07	NaN	NA	0	0	0.614695	NA	0	1	0	1
Q9Y2C3	B3GALT5	2	1	0	0	0	6.75022e-07	5.53011e-07	0.819249	NaN	NaN	NA	0	0	0.614695	NA	0	1	0	1
Q9Y5K5	UCHL5	2	1	2	0	1	7.53224e-07	4.82157e-07	0.640125	7.35095e-07	NaN	NA	0	0	0.614695	NA	0	1	0	0.487179
P53602	MVD	3	5	3	7	6	2.39228e-06	2.91183e-06	1.21718	2.67794e-06	6.74194e-06	2.51758	0	0	0.614757	0.165375	1	0.694765	1	0.273343
P80723	BASP1	18	14	16	14	6	6.80144e-05	6.40616e-05	0.941882	8.31338e-05	6.3862e-05	0.768184	0	0	0.615379	0.43718	0	0.235116	0	0.716427
P55263	ADK	12	10	10	8	5	2.49014e-05	2.11057e-05	0.847568	1.39273e-05	1.42736e-05	1.02487	0	0	0.619556	0.988183	0	0.751186	0	0.751186
P62807,Q99880,Q99879,Q99877,P58876	H2BC8,H2BC13,H2BC14,H2BC15,H2BC5	20	20	0	0	0	0.00605622	0.00544532	0.899129	NaN	NaN	NA	0	0	0.620465	NA	0	1	0	1
O15260	SURF4	3	2	7	4	5	1.02089e-06	6.52183e-07	0.63884	1.07089e-05	4.58323e-06	0.427982	0	0	0.621115	0.235612	0	1	0	0.480115
O94804	STK10	3	2	6	4	1	2.09098e-06	1.12497e-06	0.538012	6.23438e-06	4.91676e-06	0.788652	0	0	0.621115	0.631091	0	1	0	0.716427
O95865	DDAH2	2	3	7	3	3	2.11077e-06	6.77803e-06	3.21117	8.77631e-06	3.53648e-06	0.402957	0	0	0.621115	0.135194	1	1	0	0.273343
P49662,P51878,Q6UXS9	CASP4,CASP5,CASP12	2	3	0	0	0	1.4213e-06	2.21088e-06	1.55553	NaN	NaN	NA	0	0	0.621115	NA	1	1	0	1
Q02338	BDH1	3	2	0	2	0	2.62392e-06	1.28008e-06	0.487851	NaN	3.11594e-06	NA	0	0	0.621115	NA	0	1	1	0.487179
Q09028	RBBP4	3	2	5	2	1	3.36588e-06	1.88121e-06	0.558907	5.87034e-06	3.29468e-06	0.561242	0	0	0.621115	0.261368	0	1	0	0.407484
Q7Z5R6	APBB1IP	3	2	2	0	0	2.18164e-06	1.32473e-06	0.607218	1.87026e-06	NaN	NA	0	0	0.621115	NA	0	1	0	0.487179
Q86YV0	RASAL3	3	2	6	2	2	2.04188e-06	1.28984e-06	0.631694	3.83554e-06	1.34686e-06	0.351152	0	0	0.621115	0.146554	0	1	0	0.235116
Q8N8A2	ANKRD44	3	2	0	1	0	6.66849e-07	3.61413e-07	0.541971	NaN	2.94254e-07	NA	0	0	0.621115	NA	0	1	1	1
Q9NPP4	NLRC4	2	3	2	0	0	1.32204e-06	2.70184e-06	2.04369	2.48e-06	NaN	NA	0	0	0.621115	NA	1	1	0	0.487179
Q9UNZ2	NSFL1C	13	10	8	10	7	2.04077e-05	1.71745e-05	0.84157	1.02438e-05	1.60992e-05	1.57161	0	0	0.622291	0.321026	0	0.523107	1	0.751186
Q15417	CNN3	15	15	8	9	7	2.86228e-05	3.72663e-05	1.30198	8.91614e-06	1.05852e-05	1.18719	0	0	0.623629	0.578221	0	1	1	1
Q13404	UBE2V1	9	7	10	12	6	2.24962e-05	1.77606e-05	0.789496	5.75299e-05	9.25569e-05	1.60885	0	0	0.625037	0.196757	0	0.747527	1	0.751186
P69905,P02008	HBA2,HBZ	19	15	13	15	9	0.00399444	0.00610993	1.52961	0.0040142	0.00312698	0.778982	0	0	0.62576	0.475888	0	0.181764	1	0.731094
P05114	HMGN1	11	11	1	1	0	1.40949e-05	9.6651e-06	0.685718	3.14771e-06	2.31836e-06	0.736523	0	0	0.629597	1	0	1	0	1
P36222	CHI3L1	8	7	10	4	2	4.83508e-05	3.15546e-05	0.652618	3.78558e-05	1.70759e-05	0.451077	0	0	0.629676	0.0678603	0	1	0	0.0958456
A1A5D9	BICDL2	11	13	8	8	16	1.89688e-05	3.83691e-05	2.02275	8.77015e-06	1.47075e-05	1.677	0	0	0.634602	0.592966	1	0.747527	0	1
P23588	EIF4B	16	16	11	7	4	6.39324e-06	5.69154e-06	0.890244	4.77965e-06	4.20855e-06	0.880515	0	0	0.634607	0.406862	0	1	0	0.340644
P14317	HCLS1	7	6	7	4	1	1.87941e-05	1.40398e-05	0.747034	2.30589e-05	9.39028e-06	0.40723	0	0	0.637448	0.197343	0	1	0	0.480115
P15498,Q9UKW4	VAV1,VAV3	7	6	0	0	0	5.05969e-06	3.83159e-06	0.757278	NaN	NaN	NA	0	0	0.637448	NA	0	1	0	1
P62917	RPL8	7	6	8	13	9	3.61966e-05	2.32493e-05	0.642307	5.25332e-05	0.000110671	2.10669	0	0	0.637448	0.0691226	0	1	1	0.204927
P00352	ALDH1A1	4	3	4	2	2	5.06175e-06	2.28235e-06	0.450901	2.19376e-06	1.31271e-06	0.598382	0	0	0.638579	0.395893	0	1	0	0.66142
P16989,Q9Y2T7	YBX3,YBX2	3	4	0	1	0	1.76388e-06	2.95793e-06	1.67695	NaN	5.39716e-07	NA	0	0	0.638579	NA	1	1	1	1
P05198	EIF2S1	7	5	10	11	9	7.21246e-06	5.5637e-06	0.771402	1.33373e-05	1.81205e-05	1.35863	0	0	0.640405	0.448132	0	0.731094	1	1
P62263	RPS14	11	12	8	13	12	5.56147e-05	6.14741e-05	1.10536	2.96041e-05	5.57959e-05	1.88474	0	0	0.64232	0.0608112	1	1	1	0.204927
O14798	TNFRSF10C	6	5	3	1	1	3.17732e-06	2.05682e-06	0.647346	1.20221e-06	1.06661e-06	0.887206	0	0	0.642578	0.349723	0	1	0	0.60499
O75223	GGCT	6	5	5	3	2	1.03349e-05	8.52416e-06	0.824796	1.0248e-05	5.84868e-06	0.570716	0	0	0.642578	0.461984	0	1	0	0.694765
P10644	PRKAR1A	6	5	0	0	0	8.3485e-06	5.81681e-06	0.696749	NaN	NaN	NA	0	0	0.642578	NA	0	1	0	1
Q969L2	MAL2	6	8	4	9	9	2.22139e-05	3.04863e-05	1.3724	1.21483e-05	2.96916e-05	2.44409	0	0	0.645191	0.082066	1	0.741054	1	0.175996
O95361,Q309B1	TRIM16,TRIM16L	19	17	15	16	15	8.26435e-05	7.23355e-05	0.875271	6.08174e-05	6.33092e-05	1.04097	0	1	0.645468	0.673276	0	0.60499	1	1
P28288	ABCD3	14	12	10	12	18	2.67492e-05	2.29926e-05	0.859562	2.111e-05	2.56726e-05	1.21613	0	0	0.648269	0.435284	0	0.741054	1	0.751186
P48449	LSS	7	8	3	4	4	5.01747e-06	6.41806e-06	1.27914	2.5461e-06	5.17181e-06	2.03126	0	0	0.651936	0.526697	1	1	1	1
P22894	MMP8	15	16	14	10	7	0.000129521	9.78867e-05	0.755761	0.000148105	5.01051e-05	0.338308	0	0	0.653533	0.0456207	1	1	0	0.333213
P53992	SEC24C	18	15	16	16	11	1.87685e-05	1.62097e-05	0.863664	1.45394e-05	1.58225e-05	1.08825	0	1	0.654512	0.523346	0	0.407484	0	1
O95147	DUSP14	2	3	5	4	5	3.63394e-06	4.9331e-06	1.35751	4.56066e-06	4.62518e-06	1.01415	0	0	0.654732	0.781441	1	1	0	1
P25325	MPST	2	3	3	2	0	2.03445e-06	3.17947e-06	1.56282	7.61408e-06	5.17683e-06	0.679903	0	0	0.654732	0.654732	1	1	0	1
P55795	HNRNPH2	3	2	9	12	7	7.04492e-07	1.39603e-06	1.98161	9.97043e-06	1.57356e-05	1.57822	0	0	0.654732	0.148316	0	1	1	0.527254
P61956,Q6EEV6,P55854	SUMO2,SUMO4,SUMO3	3	2	3	2	1	6.31114e-06	3.66048e-06	0.580002	8.4466e-06	7.36824e-06	0.872332	0	0	0.654732	0.689065	0	1	0	1
P62760	VSNL1	2	3	0	1	0	2.37871e-06	3.63481e-06	1.52806	NaN	1.04187e-06	NA	0	0	0.654732	NA	1	1	1	1
Q9NNX1	TUFT1	2	3	2	6	5	1.65197e-06	2.54042e-06	1.53781	1.8408e-06	7.56139e-06	4.10766	0	0	0.654732	0.0998904	1	1	1	0.235116
Q9Y3B3	TMED7	2	3	13	10	5	2.55104e-06	3.93379e-06	1.54203	1.85058e-05	1.61043e-05	0.870229	0	0	0.654732	0.4557	1	1	0	0.523107
P08962	CD63	12	9	8	7	4	4.80232e-05	4.91326e-05	1.0231	3.55118e-05	3.19277e-05	0.899075	0	0	0.657281	0.74394	0	0.527254	0	1
P06576	ATP5F1B	20	20	20	20	19	0.000792692	0.000670653	0.846044	0.000635199	0.000699143	1.10067	0	1	0.658798	0.24227	0	1	0	1
P55072	VCP	20	20	20	20	19	0.000665242	0.000639863	0.96185	0.000480046	0.000572244	1.19206	0	1	0.658798	0.00948361	0	1	0	1
P62495	ETF1	12	10	13	19	12	1.29395e-05	1.19927e-05	0.926827	1.42586e-05	2.63324e-05	1.84678	0	0	0.660126	0.00257437	0	0.751186	1	0.043596
Q96LJ7	DHRS1	11	9	12	10	15	2.28096e-05	2.07322e-05	0.908924	2.25484e-05	1.83081e-05	0.811946	0	0	0.6645	0.487011	0	0.752371	0	0.751186
Q99439	CNN2	17	17	14	9	10	9.0414e-05	8.75678e-05	0.968521	5.29788e-05	2.25869e-05	0.426339	0	0	0.664642	0.0412711	0	1	0	0.200287
P62330	ARF6	19	17	15	16	12	8.83168e-05	7.67473e-05	0.869	6.78394e-05	8.15722e-05	1.20243	0	1	0.665011	0.347974	0	0.60499	1	1
Q08209,P16298,P48454	PPP3CA,PPP3CB,PPP3CC	5	6	5	1	0	5.6491e-06	6.55169e-06	1.15978	6.65177e-06	8.87827e-07	0.133472	0	0	0.667399	0.067464	1	1	0	0.181764
P78324,Q5TFQ8,Q9P1W8,O00241	SIRPA,SIRPB1,SIRPG	10	8	0	0	0	1.23459e-05	1.06551e-05	0.863049	NaN	NaN	NA	0	0	0.667541	NA	0	0.751186	0	1
O00203,Q13367	AP3B1,AP3B2	4	3	2	1	0	9.80495e-07	7.64544e-07	0.779754	7.37371e-07	3.36118e-07	0.455833	0	0	0.668037	0.573704	0	1	0	1
Q92888	ARHGEF1	4	3	6	4	1	3.5782e-06	2.56838e-06	0.717787	1.12497e-05	6.22963e-06	0.553761	0	0	0.668037	0.403217	0	1	0	0.716427
Q96N66	MBOAT7	3	4	3	3	0	3.41668e-06	4.90084e-06	1.43439	3.99366e-06	3.37146e-06	0.844202	0	0	0.668037	0.965273	1	1	0	1
Q9UBW5	BIN2	4	3	2	0	0	3.68729e-06	2.90519e-06	0.787891	4.46315e-06	NaN	NA	0	0	0.668037	NA	0	1	0	0.487179
Q9Y365	STARD10	4	3	1	1	0	6.5087e-06	4.33024e-06	0.665301	1.13289e-06	3.95242e-06	3.4888	0	0	0.668037	1	0	1	0	1
P51858	HDGF	4	5	4	1	0	6.47116e-06	8.20397e-06	1.26777	1.005e-05	2.62284e-06	0.260979	0	0	0.670538	0.179728	1	1	0	0.341649
P52597	HNRNPF	5	4	4	5	2	1.02906e-05	6.78128e-06	0.658979	7.65758e-06	9.21402e-06	1.20326	0	0	0.670538	0.670538	0	1	1	1
Q8NDH2	CCDC168	4	5	1	1	0	1.62673e-05	2.3999e-05	1.47528	1.08411e-05	4.17477e-06	0.385089	0	0	0.670538	1	1	1	0	1
P46776	RPL27A	17	16	13	12	7	5.73798e-05	5.04774e-05	0.879708	3.65033e-05	4.3741e-05	1.19827	0	0	0.674206	0.531792	0	1	0	1
P11215,Q13349	ITGAM,ITGAD	18	16	18	16	15	0.000349636	0.000330043	0.943961	0.000439299	0.000334511	0.761467	0	1	0.67451	0.378548	0	0.66142	0	0.66142
Q687X5	STEAP4	8	7	5	6	2	5.22118e-06	4.42429e-06	0.847373	5.00751e-06	3.43259e-06	0.685489	0	0	0.674511	0.904228	0	1	1	1
Q14CN4	KRT72	7	5	10	7	14	2.09381e-05	1.64339e-05	0.784878	4.07253e-05	4.76907e-05	1.17104	0	0	0.688862	0.480032	0	0.731094	0	0.523107
O00487	PSMD14	3	2	2	7	3	3.66815e-06	3.13224e-06	0.853902	1.63736e-06	7.71026e-06	4.70896	0	0	0.689065	0.0521263	0	1	1	0.127386
O43490	PROM1	2	3	1	3	1	1.53627e-06	2.1891e-06	1.42494	9.90052e-07	5.35449e-06	5.40829	0	0	0.689065	0.275281	1	1	1	0.60499
P32121	ARRB2	3	2	2	1	0	2.22026e-06	1.67471e-06	0.754285	1.50991e-06	6.17994e-07	0.409292	0	0	0.689065	0.534056	0	1	0	1
Q86YZ3	HRNR	2	3	6	11	11	2.17097e-06	4.34678e-06	2.00223	2.87136e-05	9.99491e-06	0.34809	0	0	0.689065	0.121685	1	1	1	0.200287
Q8N4C8	MINK1	3	2	1	0	0	1.17725e-06	8.29566e-07	0.704664	6.39456e-07	NaN	NA	0	0	0.689065	NA	0	1	0	1
Q86UT6	NLRX1	14	14	7	9	6	1.00713e-05	1.13508e-05	1.12705	6.04062e-06	7.19178e-06	1.19057	0	0	0.690928	0.691302	0	1	1	0.747527
P00915	CA1	5	6	7	3	4	4.51525e-05	0.000121925	2.7003	7.0548e-05	9.13324e-05	1.29461	0	0	0.69259	0.165375	1	1	0	0.273343
Q32MZ4	LRRFIP1	16	16	16	14	7	2.23154e-05	2.0558e-05	0.921249	1.82984e-05	1.52325e-05	0.832448	0	0	0.693743	0.390479	0	1	0	0.716427
O95197	RTN3	9	6	0	0	0	4.87135e-05	4.55489e-05	0.935037	NaN	NaN	NA	0	0	0.697382	NA	0	0.514476	0	1
O94885	SASH1	4	5	1	4	1	5.00061e-06	6.617e-06	1.32324	9.26153e-07	5.0391e-06	5.44089	0	0	0.697707	0.138124	1	1	1	0.341649
Q13263	TRIM28	4	3	3	5	0	1.30183e-05	5.72377e-06	0.439671	9.68027e-06	1.404e-05	1.45037	0	0	0.698015	0.394365	0	1	1	0.694765
Q8WXI7	MUC16	4	3	5	0	1	1.78181e-05	1.49556e-05	0.839345	8.61839e-06	NaN	NA	0	0	0.698015	NA	0	1	0	0.047124
P04843	RPN1	20	20	20	20	19	0.000134203	0.000123632	0.921232	0.000115282	0.000132684	1.15094	0	1	0.698028	0.0809763	0	1	0	1
P05388,Q8NHW5	RPLP0,RPLP0P6	20	19	18	20	18	0.000137419	0.000129203	0.940214	0.00014201	0.000182825	1.28742	0	1	0.698028	0.0858402	0	1	1	0.487179
P08246	ELANE	20	19	17	17	18	0.00432353	0.00399125	0.923147	0.00395144	0.0036489	0.923435	0	1	0.698028	0.551121	0	1	0	1
P59998	ARPC4	20	19	19	20	18	0.000202056	0.000175754	0.869824	0.000253354	0.00026466	1.04463	0	1	0.698028	0.904208	0	1	1	1
Q16777,Q6FI13,Q99878,Q96KK5,Q9BTM1,P0C0S8	H2AC20,H2AC19,H2AC14,H2AC12,H2AJ,H2AC17	20	20	0	0	0	0.00493766	0.0046597	0.943705	NaN	NaN	NA	0	0	0.698028	NA	0	1	0	1
P27361,Q16659	MAPK3,MAPK6	15	13	0	0	0	3.69368e-05	3.22095e-05	0.872017	NaN	NaN	NA	0	0	0.701063	NA	0	0.731094	0	1
Q9BTE1	DCTN5	6	6	4	3	3	1.09423e-06	8.68977e-07	0.794145	8.10384e-07	7.10714e-07	0.877009	0	0	0.701189	0.728472	0	1	0	1
Q9BWD1	ACAT2	10	12	8	12	10	1.43934e-05	1.69575e-05	1.17814	1.25123e-05	2.50092e-05	1.99877	0	0	0.701721	0.0707439	1	0.751186	1	0.343067
P18124	RPL7	17	15	18	18	15	9.87409e-05	9.27259e-05	0.939082	0.000100462	0.000130846	1.30245	0	1	0.703795	0.0762929	0	0.694765	0	1
P00441	SOD1	11	12	10	12	8	4.73856e-05	3.77192e-05	0.796004	4.19687e-05	3.0612e-05	0.729401	0	0	0.703938	1	1	1	1	0.751186
P52789	HK2	9	8	3	4	3	9.68638e-06	7.37531e-06	0.76141	2.93689e-06	3.48275e-06	1.18586	0	0	0.707166	0.759363	0	1	1	1
P29466	CASP1	14	11	8	7	2	3.14114e-05	3.21878e-05	1.02472	1.91944e-05	1.74152e-05	0.907306	0	0	0.707539	0.791454	0	0.514476	0	1
Q9HD89	RETN	13	12	14	12	9	0.000129243	0.000126211	0.976541	0.000111257	8.83527e-05	0.794129	0	0	0.707539	0.32637	0	1	0	0.741054
P49588	AARS1	7	6	1	0	0	5.84701e-06	4.53417e-06	0.775467	6.77156e-07	NaN	NA	0	0	0.708579	NA	0	1	0	1
Q02750	MAP2K1	6	7	0	0	0	8.38344e-06	9.99544e-06	1.19228	NaN	NaN	NA	0	0	0.708579	NA	1	1	0	1
O75436	VPS26A	16	16	11	10	6	2.51018e-05	2.2891e-05	0.911926	1.62043e-05	1.85369e-05	1.14395	0	0	0.7139	0.501163	0	1	0	1
P35998	PSMC2	17	16	10	14	11	2.49321e-05	2.21371e-05	0.887898	1.50786e-05	2.54518e-05	1.68795	0	0	0.714261	0.120762	0	1	1	0.333213
P41218	MNDA	17	16	17	17	15	0.000567847	0.000543991	0.957989	0.00060324	0.00039397	0.65309	0	1	0.714261	0.432018	0	1	0	1
P31930	UQCRC1	20	18	19	19	17	0.000145514	0.000115293	0.792315	9.20665e-05	0.000121297	1.31749	0	1	0.714967	0.151652	0	0.487179	0	1
P11169,Q8TDB8	SLC2A3,SLC2A14	13	11	7	6	2	3.11137e-05	2.90866e-05	0.934846	2.25547e-05	2.45473e-05	1.08834	0	0	0.716281	0.807417	0	0.747527	0	1
P62136	PPP1CA	20	20	5	6	3	0.000110145	0.00010815	0.981881	7.44817e-06	8.41577e-06	1.12991	0	0	0.71795	0.796537	0	1	1	1
Q09666	AHNAK	20	20	20	20	19	0.00363479	0.0036327	0.999425	0.00304489	0.00304198	0.999045	0	1	0.71795	0.383413	0	1	0	1
A6NFQ2	TCAF2	5	6	1	3	6	5.16776e-06	6.17946e-06	1.19577	8.81101e-07	3.24216e-06	3.67967	0	0	0.718126	0.29879	1	1	1	0.60499
Q9BZQ8	NIBAN1	12	10	5	7	2	1.98233e-05	1.63894e-05	0.826776	8.1834e-06	1.28472e-05	1.56991	0	0	0.722868	0.640405	0	0.751186	1	0.731094
Q92614	MYO18A	15	15	3	1	2	1.24028e-05	1.37282e-05	1.10686	1.88086e-06	7.33733e-07	0.390106	0	0	0.723036	0.323604	0	1	0	0.60499
O75477	ERLIN1	3	2	6	6	2	2.45552e-06	2.4324e-06	0.990586	1.09296e-05	1.45513e-05	1.33136	0	0	0.72405	0.802394	0	1	0	1
Q9BPW9	DHRS9	3	2	2	1	2	3.51599e-06	2.94763e-06	0.838349	3.73008e-06	1.81465e-06	0.486491	0	0	0.72405	0.573704	0	1	0	1
Q9BTT6	LRRC1	2	3	2	3	1	5.77249e-07	5.91368e-07	1.02446	7.4944e-07	6.09807e-07	0.813683	0	0	0.72405	0.759622	1	1	1	1
Q9UHY7	ENOPH1	2	3	2	1	1	4.09784e-07	3.72677e-07	0.909447	4.70745e-07	7.95905e-07	1.69073	0	0	0.72405	0.614695	1	1	0	1
Q6YN16	HSDL2	12	11	7	6	3	1.49437e-05	1.36053e-05	0.910436	7.45331e-06	9.30916e-06	1.249	0	0	0.724942	0.961117	0	1	0	1
P35914	HMGCL	5	4	2	1	0	4.9427e-06	3.86088e-06	0.781128	2.44329e-06	6.73811e-07	0.27578	0	0	0.725269	0.534056	0	1	0	1
P45877	PPIC	4	5	2	2	1	1.6106e-06	2.61351e-06	1.62269	1.45552e-06	9.01859e-07	0.619612	0	0	0.725269	0.937886	1	1	0	1
P04003	C4BPA	10	14	13	8	8	6.01653e-05	3.74364e-05	0.622227	5.28466e-05	4.50819e-05	0.853071	0	0	0.726747	0.258205	1	0.333213	0	0.204927
Q14160	SCRIB	7	7	1	0	2	3.24231e-06	2.64784e-06	0.816651	4.03264e-07	NaN	NA	0	0	0.726857	NA	0	1	0	1
O00560	SDCBP	4	3	7	6	2	5.34789e-06	4.06819e-06	0.76071	1.36842e-05	1.29748e-05	0.948161	0	0	0.728472	0.637448	0	1	0	1
P63162,P14678	SNRPN,SNRPB	4	3	10	7	4	9.54539e-06	6.15565e-06	0.644883	1.37945e-05	1.25729e-05	0.911444	0	0	0.728472	0.663002	0	1	0	0.523107
Q92609	TBC1D5	3	4	0	1	0	2.66103e-07	3.70536e-07	1.39246	NaN	1.50152e-06	NA	0	0	0.728472	NA	1	1	1	1
Q16778	H2BC21	12	15	0	0	0	0.000113844	0.000108206	0.950479	NaN	NaN	NA	0	0	0.730808	NA	1	0.500603	0	1
P33121	ACSL1	16	13	0	0	0	2.80046e-05	2.69786e-05	0.963364	NaN	NaN	NA	0	0	0.732599	NA	0	0.480115	0	1
Q9BQI0	AIF1L	7	6	10	6	11	2.09635e-05	1.65178e-05	0.787934	1.71437e-05	1.33488e-05	0.778644	0	0	0.732905	0.384005	0	1	0	0.333213
P21291	CSRP1	14	16	16	17	17	1.47985e-05	1.54611e-05	1.04478	3.12866e-05	3.18005e-05	1.01643	0	1	0.733274	0.860067	1	0.716427	1	1
Q5IFJ7,P32969	RPL9,RPL9P9	10	8	10	13	6	1.52484e-05	1.35967e-05	0.891678	2.38051e-05	3.78597e-05	1.5904	0	0	0.733361	0.200273	0	0.751186	1	0.523107
Q99829	CPNE1	17	14	13	6	8	2.9259e-05	2.73935e-05	0.936241	2.64469e-05	1.23521e-05	0.467053	0	0	0.733822	0.0483784	0	0.450576	0	0.0561609
O75594	PGLYRP1	16	17	14	14	7	0.000247833	0.000218904	0.883276	0.000201976	0.000136305	0.674855	0	0	0.734596	0.330342	1	1	0	1
P78527	PRKDC	20	18	18	18	17	6.91238e-05	5.6223e-05	0.813366	5.316e-05	6.37804e-05	1.19978	0	1	0.735256	0.473273	0	0.487179	0	1
P35221,Q9UI47	CTNNA1,CTNNA3	20	20	18	20	18	0.000174659	0.000151808	0.869166	0.000206315	0.000266667	1.29253	0	1	0.738062	0.189523	0	1	1	0.487179
P54136	RARS1	20	19	19	19	17	7.08871e-05	6.48867e-05	0.915353	6.57893e-05	6.90528e-05	1.04961	0	1	0.738062	0.913833	0	1	0	1
P61019,Q8WUD1	RAB2A,RAB2B	20	20	20	19	19	0.000120019	0.000113396	0.94482	0.000111814	0.000104636	0.935809	0	1	0.738062	0.639514	0	1	0	1
P61247	RPS3A	20	20	20	20	19	0.000221095	0.000196533	0.888909	0.00016937	0.000188654	1.11386	0	1	0.738062	0.127419	0	1	0	1
P80188	LCN2	20	20	20	20	19	0.00243539	0.00216939	0.890774	0.00236983	0.00199733	0.842814	0	1	0.738062	0.173829	0	1	0	1
Q9H2G2	SLK	20	19	17	18	17	0.000101731	9.16701e-05	0.901098	4.70362e-05	5.668e-05	1.20503	0	1	0.738062	0.217973	0	1	1	1
P62266	RPS23	11	10	10	7	3	2.60736e-05	2.33966e-05	0.897329	2.31726e-05	1.73389e-05	0.74825	0	0	0.742024	0.443464	0	1	0	0.523107
Q86UX7	FERMT3	12	9	11	8	5	4.01134e-05	4.35945e-05	1.08678	5.5434e-05	2.66783e-05	0.481263	0	0	0.742024	0.173866	0	0.527254	0	0.527254
Q9Y5X1	SNX9	7	8	7	8	13	1.33687e-05	1.56969e-05	1.17415	1.36842e-05	1.82613e-05	1.33448	0	0	0.74394	0.586166	1	1	1	1
P16885	PLCG2	5	6	8	4	3	4.74909e-06	5.47981e-06	1.15386	6.45335e-06	2.80258e-06	0.434282	0	0	0.74398	0.18751	1	1	0	0.300845
P21730	C5AR1	5	6	2	1	2	9.8755e-06	1.29771e-05	1.31407	6.54704e-06	2.20238e-06	0.336393	0	0	0.74398	0.573704	1	1	0	1
P11940,Q9H361,Q4VXU2,Q5JQF8,Q96DU9	PABPC1,PABPC3,PABPC1L,PABPC1L2B,PABPC5	19	19	0	0	0	8.82666e-05	7.99861e-05	0.906188	NaN	NaN	NA	0	0	0.745471	NA	0	1	0	1
O15372	EIF3H	12	11	8	7	3	3.6183e-06	3.19254e-06	0.882329	4.85125e-06	3.70814e-06	0.764369	0	0	0.746156	0.74394	0	1	0	1
P05089	ARG1	8	8	11	5	4	2.4821e-05	1.89197e-05	0.762246	1.86548e-05	6.03513e-06	0.323517	0	0	0.748418	0.0350635	0	1	0	0.10534
P35754	GLRX	14	12	11	6	3	3.66644e-05	3.35055e-05	0.913843	4.31134e-05	1.37383e-05	0.318656	0	0	0.750534	0.0490122	0	0.741054	0	0.200287
O15296	ALOX15B	14	14	10	13	15	3.41905e-05	2.82925e-05	0.827496	2.11013e-05	3.01365e-05	1.42818	0	0	0.752507	0.406317	0	1	1	0.523107
P15374	UCHL3	16	15	14	16	16	1.52386e-05	1.44689e-05	0.949493	1.60151e-05	1.66668e-05	1.04069	0	0	0.754401	0.880812	0	1	1	0.716427
P62191	PSMC1	11	11	6	11	9	1.70336e-05	1.57867e-05	0.926797	8.96114e-06	1.91073e-05	2.13224	0	0	0.754985	0.0690306	0	1	1	0.200287
Q9NSD9	FARSB	16	17	14	13	17	2.62474e-05	2.56041e-05	0.975491	1.69498e-05	1.83254e-05	1.08116	0	0	0.755119	0.730808	1	1	0	1
P29350	PTPN6	10	8	10	6	2	2.41286e-05	2.88377e-05	1.19517	6.13821e-05	2.99267e-05	0.487547	0	0	0.755774	0.22761	0	0.751186	0	0.333213
O95340,O43252	PAPSS2,PAPSS1	6	7	0	0	0	8.91746e-06	1.47629e-05	1.65551	NaN	NaN	NA	0	0	0.757502	NA	1	1	0	1
Q16881	TXNRD1	6	7	8	3	1	3.87117e-06	4.34741e-06	1.12302	4.3344e-06	1.51989e-06	0.350658	0	0	0.757502	0.0711024	1	1	0	0.155187
P13797	PLS3	20	20	20	20	19	0.000436859	0.000419032	0.959193	0.000323306	0.000393321	1.21656	0	1	0.758351	0.16534	0	1	0	1
Q14166	TTLL12	20	19	20	19	18	0.000126437	0.000117067	0.925893	0.000107998	0.000119146	1.10323	0	1	0.758351	0.444964	0	1	0	1
P08559,P29803	PDHA1,PDHA2	4	3	2	1	0	1.23462e-05	4.49026e-06	0.363696	5.96821e-06	1.17062e-05	1.96142	0	0	0.759363	0.614695	0	1	0	1
P80303	NUCB2	3	4	2	6	1	5.63614e-06	6.94608e-06	1.23242	3.2416e-06	9.25176e-06	2.85407	0	0	0.759363	0.136086	1	1	1	0.235116
Q05823	RNASEL	3	4	0	0	0	2.49228e-07	2.60418e-07	1.04489	NaN	NaN	NA	0	0	0.759363	NA	1	1	0	1
Q9UJS0	SLC25A13	4	3	1	2	0	2.47304e-06	1.2572e-06	0.508362	1.67307e-06	1.74135e-06	1.04081	0	0	0.759363	0.614695	0	1	1	1
P53999	SUB1	2	3	5	1	0	5.72069e-06	4.91628e-06	0.859386	8.42615e-06	2.90109e-06	0.344296	0	0	0.759622	0.098042	1	1	0	0.181764
Q14558	PRPSAP1	2	3	2	2	2	5.23467e-07	5.59333e-07	1.06852	5.175e-07	3.32032e-07	0.641608	0	0	0.759622	0.937886	1	1	0	1
Q6NXG1	ESRP1	2	3	0	0	0	1.49506e-06	1.67674e-06	1.12152	NaN	NaN	NA	0	0	0.759622	NA	1	1	0	1
Q8IWB1	ITPRIP	2	3	1	1	1	1.22474e-06	1.59432e-06	1.30177	4.93069e-07	4.44201e-07	0.90089	0	0	0.759622	1	1	1	0	1
Q9UHK6	AMACR	2	3	0	0	1	9.39651e-07	7.70063e-07	0.81952	NaN	NaN	NA	0	0	0.759622	NA	1	1	0	1
P27816	MAP4	10	10	8	10	4	3.27142e-05	6.39147e-05	1.95373	1.3506e-05	1.6805e-05	1.24426	0	0	0.761436	0.583681	0	1	1	0.751186
Q15393	SF3B3	13	15	10	11	2	1.35623e-05	1.15752e-05	0.853479	1.01875e-05	7.65377e-06	0.751291	0	0	0.762938	0.699184	1	0.731094	1	1
P09917	ALOX5	11	10	13	7	3	3.4306e-05	2.8989e-05	0.845011	5.41567e-05	3.43253e-05	0.633813	0	0	0.763757	0.148263	0	1	0	0.112834
P41091,Q2VIR3	EIF2S3,EIF2S3B	11	9	6	14	7	2.57705e-05	1.96118e-05	0.761018	1.28799e-05	2.55625e-05	1.98468	0	0	0.772475	0.0545085	0	0.752371	1	0.0256448
P54819	AK2	11	9	5	5	1	2.05409e-05	1.69589e-05	0.825615	8.7749e-06	8.66309e-06	0.987259	0	0	0.772475	0.91502	0	0.752371	0	1
Q04446	GBE1	18	16	18	15	13	3.57727e-05	3.19203e-05	0.89231	2.96962e-05	2.28575e-05	0.76971	0	0	0.776032	0.296405	0	0.66142	0	0.407484
Q6DD88	ATL3	19	16	16	14	12	5.07754e-05	4.30399e-05	0.847653	2.67006e-05	2.57467e-05	0.964272	0	0	0.776186	0.989124	0	0.341649	0	0.716427
O94874	UFL1	10	8	12	11	8	1.08586e-05	9.7179e-06	0.894951	1.03308e-05	9.41976e-06	0.911816	0	0	0.778394	0.832796	0	0.751186	0	1
P04899,P11488,P09471,A8MTJ3	GNAI2,GNAT1,GNAO1,GNAT3	20	20	0	0	0	0.000427233	0.00040946	0.9584	NaN	NaN	NA	0	0	0.778804	NA	0	1	0	1
P08311	CTSG	20	19	18	19	19	0.00448297	0.00430451	0.960191	0.00471513	0.00401295	0.851079	0	1	0.778804	0.456866	0	1	1	1
Q07960	ARHGAP1	20	20	20	20	19	8.21977e-05	8.18692e-05	0.996004	7.49647e-05	8.5291e-05	1.13775	0	1	0.778804	0.327262	0	1	0	1
Q15286	RAB35	10	9	4	5	1	6.3398e-06	8.04441e-06	1.26887	3.30307e-06	5.18678e-06	1.57029	0	0	0.781146	0.617502	0	1	1	1
P29590	PML	5	4	4	3	1	1.06292e-05	7.59888e-06	0.714904	1.32088e-05	1.49369e-05	1.13083	0	0	0.781441	0.822265	0	1	0	1
Q92544	TM9SF4	4	5	9	11	11	2.47945e-06	2.17478e-06	0.877122	8.58861e-06	1.23424e-05	1.43707	0	0	0.781441	0.418177	1	1	1	0.752371
P43353,P48448	ALDH3B1,ALDH3B2	9	7	2	4	0	7.07632e-06	6.89719e-06	0.974686	2.37548e-06	4.72715e-06	1.98998	0	0	0.783387	0.395893	0	0.747527	1	0.66142
P42766	RPL35	12	9	2	4	6	3.44236e-05	3.10066e-05	0.900735	1.22131e-05	1.42122e-05	1.16369	0	0	0.785678	0.446117	0	0.527254	1	0.66142
Q12792	TWF1	17	17	17	20	18	7.18894e-05	7.08004e-05	0.984852	6.17346e-05	8.52452e-05	1.38083	0	1	0.786433	0.228607	0	1	1	0.230769
Q96P48	ARAP1	8	6	5	1	3	2.99672e-06	2.67914e-06	0.894023	2.36451e-06	4.58341e-07	0.193842	0	0	0.787221	0.074256	0	0.741054	0	0.181764
P05386	RPLP1	9	9	6	2	0	1.52372e-05	1.27607e-05	0.837475	1.16061e-05	4.06158e-06	0.349951	0	0	0.789776	0.126205	0	1	0	0.235116
O00429	DNM1L	3	4	4	4	0	1.27872e-06	1.42069e-06	1.11102	3.26166e-06	2.3575e-06	0.722792	0	0	0.790644	1	1	1	0	1
Q14508	WFDC2	12	13	15	13	16	0.000113554	0.000108159	0.952489	0.000103425	8.90341e-05	0.860857	0	0	0.791777	0.475888	1	1	0	0.731094
P20292	ALOX5AP	14	12	7	2	4	0.000105517	9.99249e-05	0.947004	6.55755e-05	1.32489e-05	0.20204	0	0	0.792826	0.0567675	0	0.741054	0	0.127386
Q9UJY1	HSPB8	9	11	3	3	4	2.97793e-05	2.9349e-05	0.98555	3.4201e-06	3.78307e-06	1.10613	0	0	0.79469	1	1	0.752371	0	1
P08574	CYC1	6	5	2	3	0	1.20014e-05	8.8265e-06	0.735454	9.73158e-06	1.3063e-05	1.34233	0	0	0.796537	0.621115	0	1	1	1
P11234	RALB	17	20	18	18	15	6.61747e-05	6.59341e-05	0.996364	5.1856e-05	5.03066e-05	0.97012	0	1	0.79716	0.860366	1	0.230769	0	1
Q15366	PCBP2	20	18	19	18	15	9.04519e-05	8.14944e-05	0.90097	5.31962e-05	4.96954e-05	0.934191	0	1	0.797188	0.635881	0	0.487179	0	1
P20591	MX1	11	11	11	12	5	1.19876e-05	3.24585e-05	2.70767	1.25008e-05	2.68696e-05	2.14944	0	0	0.798467	0.966321	0	1	1	1
A0AVT1	UBA6	20	19	18	18	16	7.61001e-05	6.97455e-05	0.916497	5.65197e-05	7.43272e-05	1.31507	0	1	0.799407	0.424666	0	1	0	1
P00491	PNP	20	20	20	20	19	0.000178456	0.000175146	0.981455	0.000183387	0.000162286	0.884938	0	1	0.799407	0.429082	0	1	0	1
P17987	TCP1	20	20	19	19	19	9.18044e-05	8.75032e-05	0.953147	5.36852e-05	6.81408e-05	1.26927	0	1	0.799407	0.136797	0	1	0	1
P25705	ATP5F1A	20	20	20	20	19	0.000768331	0.000665296	0.865898	0.000545032	0.000688247	1.26277	0	1	0.799407	0.0809763	0	1	0	1
Q15149	PLEC	20	20	20	20	19	0.00101306	0.000936472	0.924398	0.000816214	0.000957617	1.17324	0	1	0.799407	0.0558884	0	1	0	1
Q16181,Q6ZU15	SEPTIN7,SEPTIN14	20	20	18	17	11	4.49266e-05	4.24353e-05	0.944547	4.74251e-05	4.58066e-05	0.965874	0	1	0.799407	1	0	1	0	1
Q16795	NDUFA9	8	10	6	6	2	5.9786e-06	6.49463e-06	1.08631	7.56899e-06	4.103e-06	0.542081	0	0	0.801203	0.880646	1	0.751186	0	1
O94826	TOMM70	4	4	4	2	0	5.00708e-06	2.96451e-06	0.592064	4.54142e-06	2.10949e-06	0.464501	0	0	0.801314	0.372116	0	1	0	0.66142
P60985	KRTDAP	5	5	3	5	6	3.55786e-06	9.85072e-06	2.76872	4.47053e-06	6.91721e-06	1.54729	0	0	0.80337	0.461984	0	1	1	0.694765
O95571	ETHE1	15	15	11	13	5	4.15298e-05	4.42851e-05	1.06634	2.56313e-05	3.19162e-05	1.24521	0	0	0.80618	0.595299	0	1	1	0.747527
Q9BZ29	DOCK9	5	4	0	4	0	3.60702e-06	3.24347e-06	0.899213	NaN	3.15531e-06	NA	0	0	0.809982	NA	0	1	1	0.106029
O00160	MYO1F	11	12	12	9	7	5.65743e-05	6.23548e-05	1.10218	8.12175e-05	2.9014e-05	0.357239	0	0	0.8109	0.105824	1	1	0	0.527254
P13807	GYS1	12	11	11	8	6	1.61549e-05	1.59025e-05	0.984377	0.000387467	0.000897133	2.31538	0	0	0.8109	0.491922	0	1	0	0.527254
Q9HDC9	APMAP	18	17	18	13	11	0.000125881	0.000124673	0.990401	0.00013735	0.000144496	1.05203	0	0	0.817982	0.391492	0	1	0	0.127386
P62424	RPL7A	18	20	20	18	14	0.000148977	0.000144744	0.971587	0.000115417	0.000125719	1.08926	0	1	0.818141	0.560833	1	0.487179	0	0.487179
P61803	DAD1	8	8	9	14	12	1.00877e-05	1.15212e-05	1.14211	1.59267e-05	2.58345e-05	1.62209	0	0	0.818799	0.0252316	0	1	1	0.200287
P23284	PPIB	20	20	19	19	18	0.000256848	0.000255724	0.995625	0.000198433	0.000205609	1.03617	0	1	0.820148	0.401698	0	1	0	1
P45880	VDAC2	20	19	19	20	19	0.000344755	0.000311406	0.903266	0.000189447	0.000206177	1.08831	0	1	0.820148	0.276627	0	1	1	1
P48735	IDH2	20	20	20	20	19	0.00036007	0.000334542	0.929103	0.000327121	0.000381091	1.16499	0	1	0.820148	0.25338	0	1	0	1
P50990	CCT8	20	20	20	20	19	0.000177805	0.000167948	0.944562	0.000126516	0.000144932	1.14557	0	1	0.820148	0.108077	0	1	0	1
Q13813	SPTAN1	20	20	20	20	19	0.000187266	0.000180496	0.963846	0.000176143	0.000171584	0.974119	0	1	0.820148	0.904208	0	1	0	1
Q6ZVX7	NCCRP1	20	20	20	20	19	0.000456886	0.00043558	0.953366	0.000397061	0.000490133	1.2344	0	1	0.820148	0.149284	0	1	0	1
Q9UJ70	NAGK	20	19	20	20	19	0.000204902	0.000192662	0.940264	0.000166019	0.000184431	1.1109	0	1	0.820148	0.583114	0	1	0	1
O60884	DNAJA2	9	8	11	9	10	1.04443e-05	9.94857e-06	0.952533	9.21924e-06	1.07031e-05	1.16096	0	0	0.821669	0.563077	0	1	0	0.752371
O95359,O75410	TACC2,TACC1	8	9	0	0	0	4.35893e-06	4.78137e-06	1.09691	NaN	NaN	NA	0	0	0.821669	NA	1	1	0	1
Q8IUI8	CRLF3	4	3	0	0	2	2.75164e-06	2.82149e-06	1.02538	NaN	NaN	NA	0	0	0.822265	NA	0	1	0	1
Q8NE71	ABCF1	3	4	4	4	4	1.1238e-06	1.07627e-06	0.957705	2.97717e-06	2.00572e-06	0.673701	0	0	0.822265	0.861695	1	1	0	1
Q9UFN0,Q9BS92	NIPSNAP3A,NIPSNAP3B	3	4	4	2	0	3.43885e-06	2.97459e-06	0.864994	4.66351e-06	2.81212e-06	0.603004	0	0	0.822265	0.446117	1	1	0	0.66142
B0I1T2	MYO1G	5	6	8	4	1	5.22905e-06	6.00801e-06	1.14897	8.22315e-06	5.27795e-06	0.641841	0	0	0.823182	0.236209	1	1	0	0.300845
P40429,Q6NVV1	RPL13A,RPL13AP3	6	5	7	10	3	9.03668e-06	8.87772e-06	0.982409	1.42761e-05	1.90236e-05	1.33255	0	0	0.823182	0.235187	0	1	1	0.523107
O43681	GET3	6	6	1	0	1	8.5789e-06	7.17379e-06	0.836213	1.97357e-06	NaN	NA	0	0	0.828299	NA	0	1	0	1
P52895	AKR1C2	5	5	0	1	0	1.08777e-05	1.48487e-05	1.36506	NaN	1.059e-06	NA	0	0	0.831001	NA	0	1	1	1
Q9BVK6,Q7Z7H5	TMED9,TMED4	4	4	0	0	0	3.89658e-06	5.44218e-06	1.39666	NaN	NaN	NA	0	0	0.83138	NA	0	1	0	1
P22352	GPX3	6	7	14	15	12	9.67358e-06	9.53041e-06	0.985201	3.23323e-05	1.98152e-05	0.612862	0	0	0.832685	0.435975	1	1	1	1
Q9C0C2	TNKS1BP1	12	11	5	10	8	3.27138e-05	2.33348e-05	0.713302	1.658e-05	2.73803e-05	1.65141	0	0	0.832796	0.166257	0	1	1	0.190793
Q14254	FLOT2	12	12	12	6	4	3.30012e-05	2.77447e-05	0.840716	3.74831e-05	2.44929e-05	0.653437	0	0	0.833923	0.2796	0	1	0	0.11097
O00602	FCN1	14	12	13	8	4	2.07198e-05	2.00869e-05	0.969451	4.24618e-05	1.74442e-05	0.41082	0	0	0.835737	0.0533455	0	0.741054	0	0.204927
Q07157	TJP1	13	14	7	11	10	1.92136e-05	1.98701e-05	1.03417	8.32517e-06	1.70942e-05	2.05331	0	0	0.836454	0.0857781	1	1	1	0.340644
P55196	AFDN	15	14	7	9	11	2.19794e-05	2.09068e-05	0.9512	8.91964e-06	1.42455e-05	1.59709	0	0	0.83757	0.501586	0	1	1	0.747527
P0DOX3,P01880	IGHD	5	4	1	0	0	2.35846e-05	3.65653e-05	1.55039	2.02623e-06	NaN	NA	0	0	0.838778	NA	0	1	0	1
Q96AG4	LRRC59	4	5	3	3	0	6.32925e-06	6.01142e-06	0.949783	5.46688e-06	4.9218e-06	0.900294	0	0	0.838778	0.965273	1	1	0	1
P42224	STAT1	17	18	10	10	7	4.54479e-05	4.05791e-05	0.89287	2.90246e-05	2.64857e-05	0.912528	0	0	0.839083	0.896477	1	1	0	1
P51572	BCAP31	20	18	18	16	17	0.000129615	0.000120511	0.929758	0.000105559	9.87926e-05	0.935903	0	1	0.839225	0.989191	0	0.487179	0	0.66142
O14908,Q8TF64	GIPC1,GIPC3	11	9	6	11	9	2.86541e-05	3.08026e-05	1.07498	7.27621e-06	1.82246e-05	2.50468	0	0	0.839606	0.0456583	0	0.752371	1	0.200287
P07195	LDHB	20	19	19	19	16	0.000173976	0.000166672	0.958017	0.000126768	0.000110697	0.873225	0	1	0.841013	0.49886	0	1	0	1
O95466,Q96PY5	FMNL1,FMNL2	8	9	10	5	2	1.86718e-05	2.01544e-05	1.0794	2.64788e-05	1.00508e-05	0.37958	0	0	0.845122	0.07881	1	1	0	0.190793
P50453	SERPINB9	8	9	1	2	1	9.24077e-06	9.81318e-06	1.06194	4.20228e-07	8.07142e-07	1.92073	0	0	0.845122	0.573704	1	1	1	1
P57737	CORO7	10	8	7	5	3	1.16069e-05	1.08885e-05	0.938106	1.00566e-05	5.24146e-06	0.521198	0	0	0.847315	0.38565	0	0.751186	0	0.731094
Q9UHY1	NRBP1	10	8	4	3	3	4.6241e-06	4.05145e-06	0.87616	2.45103e-06	1.84019e-06	0.750783	0	0	0.847315	0.668037	0	0.751186	0	1
A8MQ03	CYSRT1	7	7	1	4	2	1.72629e-05	1.87776e-05	1.08774	2.55939e-06	5.77272e-06	2.2555	0	0	0.848892	0.195486	0	1	1	0.341649
P23246	SFPQ	19	19	16	17	14	9.57649e-05	8.54998e-05	0.892809	6.1822e-05	6.71809e-05	1.08668	0	1	0.849811	0.967549	0	1	1	1
P30622,Q9UDT6	CLIP1,CLIP2	10	10	0	0	0	7.95167e-06	8.24251e-06	1.03658	NaN	NaN	NA	0	0	0.850923	NA	0	1	0	1
Q1KMD3	HNRNPUL2	11	10	10	5	3	1.58683e-05	1.36283e-05	0.858838	1.36266e-05	9.78259e-06	0.717906	0	0	0.852401	0.231042	0	1	0	0.190793
P15144	ANPEP	13	12	11	9	5	1.16737e-05	1.20036e-05	1.02826	2.63218e-05	9.48296e-06	0.36027	0	0	0.856655	0.370076	0	1	0	0.752371
Q9UNM6	PSMD13	14	16	13	12	12	2.14243e-05	2.21436e-05	1.03358	1.4854e-05	1.42279e-05	0.95785	0	0	0.859349	0.922516	1	0.716427	0	1
P49748	ACADVL	20	18	15	18	12	8.95094e-05	7.20263e-05	0.804678	4.72856e-05	7.94346e-05	1.67989	0	1	0.860424	0.0594381	0	0.487179	1	0.407484
O95049	TJP3	3	3	3	2	1	3.52034e-06	1.78908e-06	0.508212	2.35802e-06	2.10813e-06	0.894027	0	0	0.861748	0.654732	0	1	0	1
P00568	AK1	3	3	0	0	0	4.01827e-06	3.01998e-06	0.751562	NaN	NaN	NA	0	0	0.861748	NA	0	1	0	1
P02788	LTF	20	20	19	20	19	0.0144833	0.0139229	0.961302	0.0171492	0.0132204	0.770908	0	1	0.861987	0.24227	0	1	1	1
P23396	RPS3	20	19	20	20	19	0.000274669	0.000270744	0.985709	0.000169989	0.000229013	1.34723	0	1	0.861987	0.0167424	0	1	0	1
P62249	RPS16	20	19	18	17	16	0.000118734	0.000116841	0.984059	9.41367e-05	9.6215e-05	1.02208	0	1	0.861987	0.776186	0	1	0	1
P67775	PPP2CA	20	19	20	19	19	0.000112074	0.000108013	0.963765	9.72256e-05	0.00010038	1.03244	0	1	0.861987	0.678306	0	1	0	1
Q00839	HNRNPU	20	20	19	20	18	0.000137361	0.000109716	0.798745	0.000102857	9.67578e-05	0.940702	0	1	0.861987	0.946695	0	1	1	1
O43390	HNRNPR	8	8	16	13	15	6.61693e-06	5.49802e-06	0.830902	3.25856e-05	2.86975e-05	0.880682	0	0	0.866584	0.77411	0	1	0	0.480115
P19878	NCF2	13	11	0	0	0	4.66036e-05	4.88586e-05	1.04839	NaN	NaN	NA	0	0	0.866789	NA	0	0.747527	0	1
Q16762	TST	13	13	12	16	11	3.22425e-05	3.97941e-05	1.23421	2.83e-05	4.17729e-05	1.47607	0	0	0.868252	0.11487	0	1	1	0.300845
P57088	TMEM33	8	9	8	13	14	1.36054e-05	1.52476e-05	1.1207	1.30166e-05	2.42095e-05	1.85989	0	0	0.868714	0.0833188	1	1	1	0.204927
Q15642	TRIP10	9	8	4	6	2	1.66542e-05	1.65682e-05	0.994839	3.84939e-06	6.89949e-06	1.79236	0	0	0.868714	0.383504	0	1	1	0.716427
Q15836,P63027,P23763	VAMP3,VAMP2,VAMP1	9	10	12	11	11	1.46609e-05	1.50999e-05	1.02995	1.58848e-05	1.75974e-05	1.10782	0	0	0.872214	0.703938	1	1	0	1
Q93084	ATP2A3	6	5	6	1	2	6.3174e-06	6.93353e-06	1.09753	7.79624e-06	9.77e-07	0.125317	0	0	0.877059	0.0354328	0	1	0	0.0914761
O00629	KPNA4	6	6	1	1	0	3.02084e-06	2.68728e-06	0.889579	4.92499e-07	5.85159e-07	1.18814	0	0	0.880646	1	0	1	0	1
P12724	RNASE3	15	16	16	15	12	0.000582568	0.000538209	0.923856	0.000604238	0.00048238	0.798328	0	0	0.881064	0.169509	1	1	0	1
P36957	DLST	17	16	6	7	5	2.60633e-05	2.20165e-05	0.844733	1.19464e-05	1.19329e-05	0.998866	0	0	0.881421	0.56951	0	1	1	1
P18085	ARF4	20	15	19	20	17	6.49738e-05	5.85453e-05	0.901061	6.77766e-05	7.23137e-05	1.06694	0	1	0.881621	0.601662	0	0.047124	1	1
P49411	TUFM	20	18	17	17	11	0.000146494	0.000121966	0.832571	0.000170764	0.000155361	0.909801	0	1	0.881725	0.724666	0	0.487179	0	1
P51991	HNRNPA3	20	18	16	16	11	0.000129685	0.000117461	0.905743	7.23445e-05	6.07289e-05	0.839441	0	1	0.881725	0.859884	0	0.487179	0	1
Q8NBS9	TXNDC5	9	9	1	0	1	6.88166e-06	7.35814e-06	1.06924	2.93837e-06	NaN	NA	0	0	0.882254	NA	0	1	0	1
P14868	DARS1	20	19	19	20	17	0.000102269	9.26754e-05	0.906191	5.70651e-05	7.75319e-05	1.35866	0	1	0.883057	0.0210768	0	1	1	1
Q9UGM3	DMBT1	11	9	8	9	4	3.14194e-05	8.79842e-05	2.80031	7.55406e-05	6.39087e-05	0.846018	0	0	0.885051	0.916228	0	0.752371	1	1
Q7L591	DOK3	3	4	1	0	0	1.23918e-06	9.89973e-07	0.79889	5.10067e-07	NaN	NA	0	0	0.886331	NA	1	1	0	1
P40394	ADH7	7	8	4	4	4	1.19087e-05	8.13233e-06	0.68289	3.61375e-06	2.9312e-06	0.811122	0	0	0.888669	0.861695	1	1	0	1
P26022	PTX3	13	11	10	6	5	1.23773e-05	1.35783e-05	1.09703	1.79101e-05	8.09137e-06	0.451776	0	0	0.888832	0.1157	0	0.747527	0	0.333213
Q92598	HSPH1	8	8	11	8	4	6.77714e-06	6.33808e-06	0.935215	1.10573e-05	8.04535e-06	0.727606	0	0	0.890672	0.327232	0	1	0	0.527254
O95202	LETM1	4	4	3	1	0	2.03166e-06	1.91775e-06	0.943931	1.43079e-06	5.11846e-07	0.357736	0	0	0.892215	0.323604	0	1	0	0.60499
Q08257	CRYZ	4	4	4	5	0	5.28225e-05	2.73738e-05	0.518222	8.44874e-06	9.55714e-06	1.13119	0	0	0.892215	0.725269	0	1	1	1
Q9Y263	PLAA	4	4	4	7	5	1.89861e-06	1.68099e-06	0.88538	2.95359e-06	5.60345e-06	1.89717	0	0	0.892215	0.310517	0	1	1	0.480115
Q9Y3R5	DOP1B	4	4	1	0	0	4.67428e-07	6.44252e-07	1.37829	2.63434e-07	NaN	NA	0	0	0.892215	NA	0	1	0	1
Q14CN2,A8K7I4	CLCA4,CLCA1	19	19	20	17	18	0.000455157	0.000387769	0.851945	0.000259568	0.000230775	0.889074	0	1	0.892409	0.579147	0	1	0	0.230769
Q7L5N7	LPCAT2	10	8	10	9	5	9.29146e-06	1.15751e-05	1.24578	1.42217e-05	9.89432e-06	0.69572	0	0	0.893955	0.37241	0	0.751186	0	1
P00918	CA2	5	4	1	1	3	4.27732e-06	7.79657e-06	1.82277	3.28552e-06	8.33212e-06	2.53601	0	0	0.896984	1	0	1	0	1
O75165	DNAJC13	13	10	8	3	2	5.5364e-06	5.42971e-06	0.980729	4.04163e-06	1.46118e-06	0.361533	0	0	0.899202	0.0825518	0	0.523107	0	0.155187
Q9BQE3	TUBA1C	13	12	20	20	19	4.48806e-05	4.37141e-05	0.97401	0.00157557	0.00158855	1.00823	0	1	0.90048	0.529097	0	1	0	1
P52790	HK3	15	14	14	12	9	0.000153808	0.000197142	1.28174	0.000167199	9.09637e-05	0.544043	0	0	0.902106	0.299855	0	1	0	0.741054
P13798	APEH	16	15	14	7	4	3.00747e-05	2.85226e-05	0.948389	2.55002e-05	1.33134e-05	0.522091	0	0	0.902569	0.0608112	0	1	0	0.0561609
P19367,Q2TB90	HK1,HKDC1	20	20	20	20	19	0.00027519	0.00024213	0.879865	0.000138794	0.000211094	1.52092	0	1	0.904208	0.0283084	0	1	0	1
Q13838	DDX39B	20	20	0	0	0	0.000136058	0.000119071	0.875146	NaN	NaN	NA	0	0	0.904208	NA	0	1	0	1
Q12907	LMAN2	5	6	9	12	8	9.96848e-06	1.0827e-05	1.08612	1.28762e-05	2.1946e-05	1.70438	0	0	0.904228	0.112145	1	1	1	0.527254
Q13043	STK4	5	6	0	0	0	6.67177e-06	6.79234e-06	1.01807	NaN	NaN	NA	0	0	0.904228	NA	1	1	0	1
Q16539	MAPK14	6	5	7	1	1	3.57833e-06	3.40768e-06	0.952311	6.43773e-06	5.98419e-07	0.0929549	0	0	0.904228	0.0147263	0	1	0	0.043596
Q9Y6K5	OAS3	6	5	4	1	2	2.84437e-06	4.7712e-06	1.67742	2.17452e-06	3.5615e-06	1.63784	0	0	0.904228	0.195486	0	1	0	0.341649
P62910	RPL32	11	11	5	4	0	2.65696e-05	2.59782e-05	0.977742	5.98657e-06	5.07668e-06	0.848012	0	0	0.909649	0.781441	0	1	0	1
P21266	GSTM3	5	5	8	12	9	2.45963e-05	1.91666e-05	0.779247	2.58562e-05	2.52365e-05	0.97603	0	0	0.91502	0.496836	0	1	1	0.343067
Q13907,Q9BXS1	IDI1,IDI2	4	4	0	0	0	2.08293e-06	1.78566e-06	0.857281	NaN	NaN	NA	0	0	0.922895	NA	0	1	0	1
P13498	CYBA	14	12	11	5	3	6.34954e-05	5.70988e-05	0.899258	6.47546e-05	4.22865e-05	0.653028	0	0	0.922915	0.134466	0	0.741054	0	0.10534
Q02790	FKBP4	18	15	12	11	12	4.16589e-05	3.68334e-05	0.884168	2.24001e-05	2.72488e-05	1.21646	0	0	0.924374	0.767563	0	0.407484	0	1
O14907	TAX1BP3	18	16	8	9	9	1.98448e-05	1.86987e-05	0.942246	8.76293e-06	1.07547e-05	1.2273	0	0	0.924449	0.55785	0	0.66142	1	1
P25398	RPS12	18	17	15	13	10	9.0307e-05	8.40282e-05	0.930473	4.15064e-05	4.01761e-05	0.967949	0	0	0.924502	0.934439	0	1	0	0.731094
P62195,Q8NB90	PSMC5,SPATA5	20	18	19	16	17	4.12262e-05	3.86914e-05	0.938515	3.02787e-05	3.18071e-05	1.05048	0	1	0.924569	0.309948	0	0.487179	0	0.341649
P55786,A6NEC2	NPEPPS,NPEPPSL1	20	20	20	20	19	0.000722191	0.000702426	0.972633	0.000664557	0.000779765	1.17336	0	1	0.925426	0.221065	0	1	0	1
Q9NPQ8	RIC8A	3	3	0	0	0	5.40553e-07	3.99258e-07	0.738611	NaN	NaN	NA	0	0	0.930612	NA	0	1	0	1
Q8N6Q3	CD177	11	9	11	12	10	4.72722e-05	5.09725e-05	1.07828	6.32616e-05	6.34058e-05	1.00228	0	0	0.930877	0.622291	0	0.752371	1	1
A0A0C4DH29	IGHV1-3	6	6	0	0	0	4.74873e-05	3.02592e-05	0.637206	NaN	NaN	NA	0	0	0.93352	NA	0	1	0	1
Q9H8H3	METTL7A	19	19	16	16	15	5.96858e-05	5.62623e-05	0.942641	4.30396e-05	4.7851e-05	1.11179	0	1	0.935319	0.775528	0	1	0	1
Q9UHW9,Q9UP95,Q9H2X9	SLC12A6,SLC12A4,SLC12A5	6	8	0	0	0	5.10064e-06	4.98496e-06	0.977322	NaN	NaN	NA	0	0	0.936724	NA	1	0.741054	0	1
P13646	KRT13	2	2	0	0	0	0.000967078	8.38773e-05	0.0867327	NaN	NaN	NA	0	0	0.937886	NA	0	1	0	1
P20962	PTMS	2	2	4	3	1	2.73738e-06	8.05743e-07	0.294348	6.5014e-06	4.98214e-06	0.766318	0	0	0.937886	0.759363	0	1	0	1
P51970	NDUFA8	2	2	1	1	0	2.15753e-06	1.19526e-06	0.553997	7.99836e-07	1.64868e-06	2.06127	0	0	0.937886	1	0	1	0	1
P55160	NCKAP1L	2	2	5	0	0	1.96831e-06	2.49645e-06	1.26832	4.40887e-06	NaN	NA	0	0	0.937886	NA	0	1	0	0.047124
P55209	NAP1L1	2	2	2	0	0	7.41736e-07	3.78152e-07	0.50982	1.6401e-06	NaN	NA	0	0	0.937886	NA	0	1	0	0.487179
Q02880	TOP2B	2	2	0	0	0	5.09637e-07	3.61361e-07	0.709057	NaN	NaN	NA	0	0	0.937886	NA	0	1	0	1
Q5S007	LRRK2	2	2	0	0	0	1.33899e-06	1.1369e-06	0.849072	NaN	NaN	NA	0	0	0.937886	NA	0	1	0	1
Q8IWE2	FAM114A1	2	2	0	1	0	1.5825e-06	9.4221e-07	0.595395	NaN	1.22779e-06	NA	0	0	0.937886	NA	0	1	1	1
Q8TDZ2	MICAL1	2	2	2	1	1	1.56481e-06	2.21473e-06	1.41533	1.3769e-06	1.05881e-06	0.768979	0	0	0.937886	0.614695	0	1	0	1
P30519	HMOX2	8	7	8	10	11	1.22865e-05	1.15914e-05	0.943422	1.1418e-05	1.39735e-05	1.22381	0	0	0.93801	0.604184	0	1	1	0.751186
Q9UHB9	SRP68	8	8	9	9	6	2.15643e-06	2.04656e-06	0.949049	4.45389e-06	3.76385e-06	0.84507	0	0	0.93913	0.678351	0	1	0	1
P12268	IMPDH2	10	8	11	8	10	1.89424e-05	1.88922e-05	0.997351	2.41874e-05	1.26601e-05	0.523417	0	0	0.940966	0.164793	0	0.751186	0	0.527254
Q99805	TM9SF2	9	10	7	9	5	8.61483e-06	7.92088e-06	0.919447	7.59044e-06	1.07116e-05	1.4112	0	0	0.941717	0.482342	1	1	1	0.747527
Q9NTK5	OLA1	11	10	8	3	4	1.25262e-05	1.24377e-05	0.992931	9.8215e-06	3.98685e-06	0.40593	0	0	0.942952	0.109919	0	1	0	0.155187
Q13418	ILK	5	5	7	6	1	2.96286e-06	3.16086e-06	1.06683	3.46819e-06	2.47967e-06	0.714975	0	0	0.943287	0.56951	0	1	0	1
Q9H4M9	EHD1	16	16	14	11	10	8.3678e-05	5.22207e-05	0.624068	4.68653e-05	2.29588e-05	0.489888	0	0	0.945871	0.104012	0	1	0	0.514476
P07305	H1-0	19	18	16	16	12	0.00022189	0.000199733	0.900142	0.000174731	0.000139297	0.797208	0	1	0.946074	0.19706	0	1	0	1
O60610	DIAPH1	20	18	19	20	18	4.36959e-05	4.26686e-05	0.97649	4.35338e-05	4.09421e-05	0.940466	0	1	0.946081	0.601662	0	0.487179	1	1
P05120	SERPINB2	20	20	19	20	17	0.000220439	0.000213549	0.968745	0.00012813	0.000150618	1.17551	0	1	0.946695	0.383413	0	1	1	1
P43490	NAMPT	20	20	20	20	19	0.000482058	0.000472302	0.979762	0.000401082	0.000422827	1.05422	0	1	0.946695	0.861987	0	1	0	1
P63104	YWHAZ	20	20	20	20	19	0.00268083	0.00263479	0.982827	0.00395583	0.00463773	1.17238	0	1	0.946695	0.0717768	0	1	0	1
O60502	OGA	7	9	4	3	2	3.29463e-06	3.11441e-06	0.945298	1.85632e-06	1.26538e-06	0.681658	0	0	0.951287	0.668037	1	0.747527	0	1
O00194	RAB27B	4	4	1	1	0	1.93634e-06	1.55008e-06	0.80052	1.15826e-06	1.06268e-06	0.917481	0	0	0.953691	1	0	1	0	1
Q9NTJ5	SACM1L	4	4	2	3	2	4.09711e-06	4.3856e-06	1.07041	1.62197e-06	3.18525e-06	1.96381	0	0	0.953691	0.621115	0	1	1	1
Q15363	TMED2	11	11	10	12	13	1.09917e-05	1.04492e-05	0.950647	1.55881e-05	2.38864e-05	1.53235	0	0	0.954752	0.313866	0	1	1	0.751186
Q15126	PMVK	5	4	6	8	9	4.9819e-06	6.09955e-06	1.22434	4.48507e-06	6.07905e-06	1.3554	0	0	0.955749	0.600304	0	1	1	0.741054
Q14739	LBR	13	13	9	6	6	4.22695e-05	4.97322e-05	1.17655	3.01912e-05	1.67106e-05	0.553492	0	0	0.955905	0.312003	0	1	0	0.514476
E9PAV3,Q13765,Q9BZK3	NACA,NACA4P	19	17	0	0	0	4.08336e-05	3.92914e-05	0.962233	NaN	NaN	NA	0	0	0.956835	NA	0	0.60499	0	1
P23368	ME2	6	6	0	0	0	4.9552e-06	4.77081e-06	0.962787	NaN	NaN	NA	0	0	0.960083	NA	0	1	0	1
Q13488	TCIRG1	9	8	1	4	2	9.21219e-06	1.13535e-05	1.23245	1.15748e-06	2.87155e-06	2.48087	0	0	0.964044	0.195486	0	1	1	0.341649
O43684	BUB3	3	3	1	1	0	2.29361e-06	2.06288e-06	0.899402	1.73014e-06	2.54019e-06	1.4682	0	0	0.965273	1	0	1	0	1
Q12931	TRAP1	3	3	1	2	0	2.27196e-06	1.90182e-06	0.837083	2.22535e-06	2.57435e-06	1.15683	0	0	0.965273	0.614695	0	1	1	1
Q14574	DSC3	3	3	4	4	7	9.33002e-06	1.16591e-05	1.24963	4.11567e-06	7.52472e-06	1.82831	0	0	0.965273	0.861695	0	1	0	1
Q8NEV1,P68400	CSNK2A3,CSNK2A1	3	3	2	3	1	1.35225e-06	1.2165e-06	0.89961	1.30974e-06	2.6524e-06	2.02513	0	0	0.965273	0.621115	0	1	1	1
Q9NT62	ATG3	10	10	6	0	0	5.91747e-06	5.78912e-06	0.97831	4.63572e-06	NaN	NA	0	0	0.965406	NA	0	1	0	0.020196
Q9BSJ8	ESYT1	13	12	9	8	5	6.14492e-06	6.20552e-06	1.00986	6.57712e-06	3.75488e-06	0.5709	0	0	0.96675	0.684949	0	1	0	1
O76027	ANXA9	12	14	8	9	10	5.59034e-05	5.29301e-05	0.946814	2.11172e-05	1.80132e-05	0.853009	0	0	0.966921	0.663002	1	0.741054	1	1
Q15067	ACOX1	14	13	8	12	12	2.88271e-05	3.54203e-05	1.22871	1.36177e-05	1.57718e-05	1.15819	0	0	0.967068	0.426537	0	1	1	0.343067
Q9UDY2	TJP2	13	14	11	14	8	2.81262e-05	2.708e-05	0.962802	1.34815e-05	1.87822e-05	1.39319	0	0	0.967068	0.272335	1	1	1	0.514476
P12532,P17540	CKMT1B,CKMT2	16	13	14	15	9	6.5405e-05	7.01967e-05	1.07326	3.47003e-05	4.63062e-05	1.33446	0	0	0.967296	0.292642	0	0.480115	1	1
Q5SSG8	MUC21	16	18	17	15	11	0.000186801	0.000153817	0.823431	0.000171706	0.000142862	0.832017	0	0	0.967581	0.399857	1	0.66142	0	0.694765
P49902	NT5C2	20	18	19	17	16	5.46132e-05	5.24464e-05	0.960323	5.00941e-05	4.00484e-05	0.799464	0	1	0.967633	0.151479	0	0.487179	0	0.60499
P00338,Q6ZMR3,P07864	LDHA,LDHAL6A,LDHC	20	20	0	0	0	0.00219942	0.00215075	0.977872	NaN	NaN	NA	0	0	0.968002	NA	0	1	0	1
P02545	LMNA	20	20	20	20	19	0.00112107	0.00110009	0.98128	0.000859091	0.00119099	1.38634	0	1	0.968002	0.000667562	0	1	0	1
P14625,Q58FF3	HSP90B1,HSP90B2P	20	20	20	20	18	0.000272505	0.000271406	0.995965	0.000224945	0.000256259	1.13921	0	1	0.968002	0.134419	0	1	0	1
P14598,A6NI72,A8MVU1	NCF1,NCF1B,NCF1C	15	13	0	0	0	7.60266e-05	8.2869e-05	1.09	NaN	NaN	NA	0	0	0.978124	NA	0	0.731094	0	1
P46781	RPS9	17	17	20	20	18	9.27535e-05	8.90111e-05	0.959652	0.000138579	0.000175229	1.26447	0	1	0.978384	0.0195368	0	1	0	1
O43747	AP1G1	19	19	14	15	14	2.58546e-05	2.52242e-05	0.975616	2.37961e-05	2.65616e-05	1.11622	0	0	0.978419	0.538551	0	1	1	1
Q9UM54	MYO6	19	19	18	20	14	7.61522e-05	7.19688e-05	0.945065	5.05087e-05	5.82073e-05	1.15242	0	1	0.978419	0.147828	0	1	1	0.487179
P06865	HEXA	2	2	2	2	0	1.83112e-06	2.1051e-06	1.14962	1.03518e-06	9.74045e-07	0.940945	0	0	0.979277	1	0	1	0	1
P07911	UMOD	2	2	0	0	0	1.53192e-05	1.9136e-05	1.24915	NaN	NaN	NA	0	0	0.979277	NA	0	1	0	1
P0C870	JMJD7	2	2	1	0	0	7.87291e-07	5.32015e-07	0.675753	3.195e-07	NaN	NA	0	0	0.979277	NA	0	1	0	1
P32942	ICAM3	2	2	0	1	0	3.67056e-06	3.19603e-06	0.870719	NaN	6.51661e-07	NA	0	0	0.979277	NA	0	1	1	1
P43250,P34947,P32298	GRK6,GRK5,GRK4	2	2	0	0	0	1.218e-06	1.351e-06	1.1092	NaN	NaN	NA	0	0	0.979277	NA	0	1	0	1
Q16666,Q6K0P9	IFI16,PYHIN1	2	2	4	3	0	3.07935e-06	2.01606e-06	0.654704	7.61947e-06	5.1416e-06	0.674797	0	0	0.979277	0.728472	0	1	0	1
Q92835	INPP5D	2	2	0	1	0	1.36129e-06	1.62366e-06	1.19274	NaN	5.38949e-07	NA	0	0	0.979277	NA	0	1	1	1
Q9H4G4	GLIPR2	2	2	4	2	0	3.74568e-06	2.79228e-06	0.745468	5.11681e-06	5.99024e-06	1.1707	0	0	0.979277	0.395893	0	1	0	0.66142
Q9H4H8	FAM83D	2	2	0	3	1	1.60889e-06	2.2644e-06	1.40743	NaN	2.85273e-06	NA	0	0	0.979277	NA	0	1	1	0.230769
Q9UN19	DAPP1	2	2	0	3	0	8.22531e-07	5.8589e-07	0.712302	NaN	8.42469e-07	NA	0	0	0.979277	NA	0	1	1	0.230769
P42331	ARHGAP25	4	4	4	1	0	2.28844e-06	2.21935e-06	0.96981	3.14259e-06	7.43974e-07	0.236739	0	0	0.984556	0.179728	0	1	0	0.341649
P61353	RPL27	4	4	6	3	0	8.36608e-06	8.30835e-06	0.9931	1.85486e-05	1.48035e-05	0.798096	0	0	0.984556	0.309018	0	1	0	0.450576
P61221	ABCE1	5	6	1	0	0	3.49579e-06	3.27907e-06	0.938003	8.81988e-08	NaN	NA	0	0	0.986286	NA	1	1	0	1
P50851	LRBA	8	8	8	12	10	7.87606e-06	7.7317e-06	0.981671	4.64937e-06	1.12083e-05	2.41072	0	0	0.987815	0.291262	0	1	1	0.343067
Q9NR31	SAR1A	10	10	9	7	8	3.03406e-05	3.13228e-05	1.03237	2.02571e-05	1.46624e-05	0.723817	0	0	0.988465	0.603573	0	1	0	0.747527
O15162	PLSCR1	11	10	7	9	5	2.35192e-05	2.64928e-05	1.12643	1.26861e-05	1.29749e-05	1.02277	0	0	0.988581	0.783387	0	1	1	0.747527
Q9H0E2	TOLLIP	10	11	7	8	11	2.01469e-05	1.94773e-05	0.966763	1.00914e-05	1.32154e-05	1.30957	0	0	0.988581	0.629676	1	1	1	1
O75923	DYSF	12	10	10	6	2	3.29954e-05	4.10129e-05	1.24299	2.29574e-05	1.48435e-05	0.646566	0	0	0.988682	0.320846	0	0.751186	0	0.333213
Q96I99	SUCLG2	10	12	4	8	2	2.48087e-05	1.5908e-05	0.641225	1.34544e-05	1.28405e-05	0.954377	0	0	0.988682	0.198927	1	0.751186	1	0.300845
P36543,Q96A05	ATP6V1E1,ATP6V1E2	11	12	6	6	6	9.14327e-06	1.02104e-05	1.11671	5.52615e-06	4.59125e-06	0.830823	0	0	0.988771	0.828299	1	1	0	1
Q8WWA1	TMEM40	12	12	9	9	9	1.73435e-05	1.75572e-05	1.01232	1.30952e-05	1.4835e-05	1.13285	0	0	0.988847	0.767059	0	1	0	1
P99999	CYCS	14	12	3	3	1	3.36326e-05	3.80734e-05	1.13204	1.62242e-05	1.0002e-05	0.616483	0	0	0.988971	1	0	0.741054	0	1
P41252	IARS1	14	13	10	9	10	1.77691e-05	1.67751e-05	0.944061	1.02046e-05	8.88867e-06	0.871046	0	0	0.98902	0.671529	0	1	0	1
Q9Y6N5	SQOR	18	18	18	19	11	9.91732e-05	9.08731e-05	0.916307	5.70798e-05	6.80855e-05	1.19281	0	1	0.989204	0.73522	0	1	1	1
O75390	CS	20	19	19	19	18	0.000137547	0.000135934	0.988271	8.02799e-05	8.50526e-05	1.05945	0	1	0.989332	0.448787	0	1	0	1
Q14152	EIF3A	20	20	18	19	19	6.25548e-05	5.89811e-05	0.942871	5.94162e-05	6.57289e-05	1.10625	0	1	0.989332	0.597794	0	1	1	1
A0A075B6I0	IGLV8-61	1	1	2	0	0	8.16042e-06	7.51447e-06	0.920843	5.98636e-06	NaN	NA	0	0	1	NA	0	1	0	0.487179
A0AV96,Q8TBY0,Q9NQ94	RBM47,RBM46,A1CF	1	1	2	3	1	6.38166e-07	1.08831e-06	1.70537	1.25117e-06	2.17738e-06	1.74027	0	0	1	0.621115	0	1	1	1
O00161	SNAP23	1	1	6	5	3	4.53452e-07	1.38073e-06	3.04492	8.24116e-06	5.73848e-06	0.69632	0	0	1	0.642578	0	1	0	1
O00233	PSMD9	5	5	0	1	0	4.21996e-06	3.56497e-06	0.844788	NaN	7.90298e-07	NA	0	0	1	NA	0	1	1	1
O14936	CASK	1	1	1	0	0	1.17259e-06	6.54751e-07	0.558381	1.16682e-06	NaN	NA	0	0	1	NA	0	1	0	1
O14974	PPP1R12A	1	1	1	1	0	1.32632e-06	7.07206e-07	0.53321	8.14365e-07	5.87645e-07	0.721599	0	0	1	1	0	1	0	1
O15173	PGRMC2	7	7	3	5	4	1.03287e-05	1.02367e-05	0.991097	4.64002e-06	6.32665e-06	1.3635	0	0	1	0.394365	0	1	1	0.694765
O15389,Q08ET2	SIGLEC5,SIGLEC14	3	3	2	0	0	1.37858e-06	1.40885e-06	1.02196	1.43471e-06	NaN	NA	0	0	1	NA	0	1	0	0.487179
O15427	SLC16A3	1	1	2	1	1	9.25103e-07	1.04768e-06	1.1325	1.4332e-06	1.38003e-06	0.962901	0	0	1	0.614695	0	1	0	1
O43592	XPOT	1	1	8	12	15	6.47076e-07	4.60562e-07	0.711759	6.54713e-06	1.10345e-05	1.6854	0	0	1	0.19821	0	1	1	0.343067
O43847	NRDC	1	1	0	0	0	3.57537e-07	2.00412e-07	0.560536	NaN	NaN	NA	0	0	1	NA	0	1	0	1
O43866	CD5L	4	4	4	1	2	8.00773e-06	7.63053e-06	0.952896	7.82514e-06	1.3796e-06	0.176303	0	0	1	0.151076	0	1	0	0.341649
O43914	TYROBP	1	1	1	1	0	5.83872e-07	7.75184e-07	1.32766	1.36863e-06	1.58448e-06	1.15771	0	0	1	1	0	1	0	1
O60271,Q9UPT6	SPAG9,MAPK8IP3	1	1	1	1	0	6.07601e-07	3.13759e-07	0.516389	2.17999e-07	1.85708e-07	0.851879	0	0	1	1	0	1	0	1
O60911	CTSV	3	3	0	0	1	2.74335e-06	2.66438e-06	0.971213	NaN	NaN	NA	0	0	1	NA	0	1	0	1
O94776	MTA2	1	1	0	1	0	1.32619e-07	3.27404e-07	2.46876	NaN	7.20216e-07	NA	0	0	1	NA	0	1	1	1
O94979	SEC31A	15	15	6	11	5	2.37062e-05	2.31907e-05	0.978256	7.97945e-06	1.41606e-05	1.77463	0	0	1	0.153428	0	1	1	0.200287
O95544	NADK	1	1	1	0	0	5.09174e-07	5.27046e-07	1.0351	4.82223e-07	NaN	NA	0	0	1	NA	0	1	0	1
P01717	IGLV3-25	1	1	0	0	0	6.16278e-06	3.6353e-06	0.58988	NaN	NaN	NA	0	0	1	NA	0	1	0	1
P04432,P01597	IGKV1D-39,IGKV1-39	1	1	1	0	0	6.42629e-07	7.82683e-07	1.21794	3.3113e-06	NaN	NA	0	0	1	NA	0	1	0	1
P05166	PCCB	1	1	1	2	0	2.62999e-06	1.24189e-06	0.472205	3.14127e-06	2.15292e-06	0.685366	0	0	1	0.614695	0	1	1	1
P05556	ITGB1	1	1	1	0	0	1.67508e-06	1.08554e-06	0.648054	1.65756e-06	NaN	NA	0	0	1	NA	0	1	0	1
P06280	GLA	1	1	0	0	0	5.91096e-07	2.64379e-07	0.447269	NaN	NaN	NA	0	0	1	NA	0	1	0	1
P08519	LPA	1	1	0	0	0	9.95541e-07	1.47498e-06	1.48159	NaN	NaN	NA	0	0	1	NA	0	1	0	1
P08754	GNAI3	15	15	9	11	6	2.89244e-05	2.89517e-05	1.00094	1.52217e-05	2.46877e-05	1.62188	0	0	1	0.235832	0	1	1	0.752371
P11387,Q969P6	TOP1,TOP1MT	1	1	0	0	0	3.13281e-07	3.90108e-07	1.24523	NaN	NaN	NA	0	0	1	NA	0	1	0	1
P12931	SRC	1	1	0	0	0	6.47114e-07	3.51087e-07	0.542542	NaN	NaN	NA	0	0	1	NA	0	1	0	1
P14406	COX7A2	1	1	5	2	0	1.03998e-06	1.95129e-06	1.87627	1.18411e-05	3.75894e-06	0.317449	0	0	1	0.27911	0	1	0	0.407484
P16144	ITGB4	1	1	1	1	0	4.13234e-06	1.69828e-06	0.410973	9.90774e-06	1.51728e-06	0.15314	0	0	1	1	0	1	0	1
P16219	ACADS	1	1	0	1	0	2.215e-06	1.5283e-06	0.689976	NaN	3.0243e-06	NA	0	0	1	NA	0	1	1	1
P17900	GM2A	1	1	1	2	1	2.42402e-06	4.89337e-06	2.0187	1.41428e-06	2.71321e-06	1.91845	0	0	1	0.614695	0	1	1	1
P22748	CA4	1	1	1	0	0	8.44446e-07	9.08112e-07	1.07539	9.1524e-07	NaN	NA	0	0	1	NA	0	1	0	1
P23634,P20020,Q16720,Q01814	ATP2B4,ATP2B1,ATP2B3,ATP2B2	1	1	0	0	0	1.83081e-06	1.21684e-06	0.664649	NaN	NaN	NA	0	0	1	NA	0	1	0	1
P30480,P30462,P30460,P01889,Q31610,P30486	HLA-B	1	1	0	0	0	6.65704e-07	4.40238e-07	0.661312	NaN	NaN	NA	0	0	1	NA	0	1	0	1
P36578	RPL4	19	20	20	20	19	0.000228123	0.000224366	0.98353	0.00016299	0.000190057	1.16607	0	1	1	0.127419	1	1	0	1
P37108	SRP14	1	1	1	0	0	1.23332e-06	7.35907e-07	0.596688	1.80572e-06	NaN	NA	0	0	1	NA	0	1	0	1
P40616	ARL1	1	1	2	3	3	1.89803e-06	2.16312e-06	1.13966	1.91148e-06	3.53281e-06	1.84821	0	0	1	0.58827	0	1	1	1
P42126	ECI1	1	1	1	1	0	5.57524e-07	1.11453e-06	1.99906	3.41631e-06	7.49163e-07	0.21929	0	0	1	1	0	1	0	1
P43307	SSR1	1	1	0	1	0	1.45389e-06	1.10751e-06	0.76176	NaN	8.45093e-07	NA	0	0	1	NA	0	1	1	1
P47914	RPL29	1	1	2	0	0	3.47689e-06	2.92201e-06	0.840408	5.59629e-06	NaN	NA	0	0	1	NA	0	1	0	0.487179
P48739	PITPNB	1	1	1	0	0	7.81051e-07	5.75686e-07	0.737066	1.08644e-06	NaN	NA	0	0	1	NA	0	1	0	1
P49023	PXN	3	3	2	1	1	1.61826e-06	1.77581e-06	1.09736	4.85196e-07	3.93472e-07	0.810954	0	0	1	0.614695	0	1	0	1
P49792,A6NKT7,P0DJD0,P0DJD1,Q7Z3J3,Q99666,O14715	RANBP2,RGPD3,RGPD1,RGPD2,RGPD4,RGPD6,RGPD8	1	1	0	0	0	1.00425e-06	2.13174e-07	0.212272	NaN	NaN	NA	0	0	1	NA	0	1	0	1
P49821	NDUFV1	1	1	2	0	0	3.93548e-06	3.17456e-06	0.80665	1.11508e-06	NaN	NA	0	0	1	NA	0	1	0	0.487179
P49903	SEPHS1	1	1	0	0	0	1.55942e-07	2.72181e-07	1.7454	NaN	NaN	NA	0	0	1	NA	0	1	0	1
P50148,O95837,P29992	GNAQ,GNA14,GNA11	1	1	0	0	0	4.78351e-07	8.76349e-07	1.83202	NaN	NaN	NA	0	0	1	NA	0	1	0	1
P50749,Q9H2L5	RASSF2,RASSF4	2	2	2	0	0	1.1465e-06	1.14618e-06	0.999716	1.36024e-06	NaN	NA	0	0	1	NA	0	1	0	0.487179
P50914	RPL14	13	13	9	9	9	4.90254e-05	4.90052e-05	0.999586	3.44836e-05	3.64067e-05	1.05577	0	0	1	0.812673	0	1	0	1
P51580	TPMT	1	1	0	1	0	3.86862e-07	3.02935e-07	0.783058	NaN	3.09761e-07	NA	0	0	1	NA	0	1	1	1
P51610	HCFC1	1	1	2	0	0	9.97411e-07	1.57371e-07	0.15778	6.27829e-07	NaN	NA	0	0	1	NA	0	1	0	0.487179
P55809,Q9BYC2	OXCT1,OXCT2	1	1	0	0	0	1.54186e-06	5.25104e-06	3.40564	NaN	NaN	NA	0	0	1	NA	0	1	0	1
P59768	GNG2	1	1	1	0	0	2.80717e-07	5.17002e-07	1.84172	1.76491e-06	NaN	NA	0	0	1	NA	0	1	0	1
P60228	EIF3E	20	19	18	15	16	4.92159e-05	4.46883e-05	0.908006	3.49343e-05	3.40399e-05	0.974398	0	0	1	0.674206	0	1	0	0.407484
P61081	UBE2M	1	1	1	0	0	8.73011e-07	1.02768e-06	1.17717	4.88287e-07	NaN	NA	0	0	1	NA	0	1	0	1
P62244	RPS15A	12	12	13	13	8	4.86554e-05	4.56714e-05	0.938671	4.57007e-05	5.38091e-05	1.17743	0	0	1	0.306345	0	1	0	1
P62750	RPL23A	1	1	5	5	3	2.25749e-06	2.19991e-06	0.974497	1.1002e-05	1.10135e-05	1.00105	0	0	1	1	0	1	0	1
P62834	RAP1A	1	1	0	1	0	7.99933e-07	9.42105e-07	1.17773	NaN	1.29859e-06	NA	0	0	1	NA	0	1	1	1
P63151,Q00005,Q66LE6,Q9Y2T4	PPP2R2A,PPP2R2B,PPP2R2D,PPP2R2C	16	14	0	0	0	2.79359e-05	2.72448e-05	0.97526	NaN	NaN	NA	0	0	1	NA	0	0.716427	0	1
P63218	GNG5	1	1	0	0	0	4.53916e-06	2.98902e-06	0.658497	NaN	NaN	NA	0	0	1	NA	0	1	0	1
P67809	YBX1	1	1	0	1	0	5.80931e-07	5.75276e-07	0.990264	NaN	3.49909e-07	NA	0	0	1	NA	0	1	1	1
P98171	ARHGAP4	4	4	3	2	0	3.38251e-06	3.17832e-06	0.939633	2.26991e-06	1.22371e-06	0.539099	0	0	1	0.621115	0	1	0	1
Q00722	PLCB2	1	1	1	0	0	2.19479e-07	2.68298e-07	1.22243	2.30883e-07	NaN	NA	0	0	1	NA	0	1	0	1
Q01844	EWSR1	1	1	1	1	0	1.31073e-06	1.12278e-06	0.856609	2.28242e-06	2.32314e-06	1.01784	0	0	1	1	0	1	0	1
Q03519	TAP2	3	3	3	3	1	4.38055e-06	3.06336e-06	0.69931	4.61283e-06	3.69554e-06	0.801144	0	0	1	0.930612	0	1	0	1
Q07654	TFF3	1	1	0	0	0	1.14023e-06	6.84676e-07	0.600471	NaN	NaN	NA	0	0	1	NA	0	1	0	1
Q08623	PUDP	1	1	0	0	0	7.41388e-07	4.47788e-07	0.603986	NaN	NaN	NA	0	0	1	NA	0	1	0	1
Q08AF3	SLFN5	1	1	1	0	0	9.37479e-07	5.50977e-07	0.587721	5.55773e-07	NaN	NA	0	0	1	NA	0	1	0	1
Q08AM6	VAC14	1	1	0	0	0	3.69141e-07	1.90042e-07	0.514822	NaN	NaN	NA	0	0	1	NA	0	1	0	1
Q08J23	NSUN2	1	1	1	0	0	6.98615e-07	3.93626e-07	0.563438	2.00291e-07	NaN	NA	0	0	1	NA	0	1	0	1
Q13277	STX3	1	1	2	0	0	3.58853e-07	3.19235e-07	0.889597	1.35344e-06	NaN	NA	0	0	1	NA	0	1	0	0.487179
Q13547,Q92769	HDAC1,HDAC2	1	1	0	0	0	2.86586e-07	2.11775e-07	0.738956	NaN	NaN	NA	0	0	1	NA	0	1	0	1
Q13576	IQGAP2	1	1	3	3	0	7.70942e-07	9.23534e-07	1.19793	4.91367e-06	4.94358e-06	1.00609	0	0	1	1	0	1	0	1
Q13586	STIM1	1	1	2	2	0	3.59637e-07	1.97053e-07	0.547924	1.26634e-06	7.25213e-07	0.572685	0	0	1	0.937886	0	1	0	1
Q13596	SNX1	3	3	2	3	0	2.66731e-06	2.8482e-06	1.06782	4.77581e-06	5.92292e-06	1.24019	0	0	1	0.654732	0	1	1	1
Q14008	CKAP5	1	1	0	0	0	1.09092e-07	8.71564e-08	0.798923	NaN	NaN	NA	0	0	1	NA	0	1	0	1
Q14344,P19086,Q03113	GNA13,GNAZ,GNA12	1	1	4	3	0	2.80745e-07	7.25498e-07	2.58419	4.72948e-06	3.33046e-06	0.70419	0	0	1	0.728472	0	1	0	1
Q14697	GANAB	20	20	20	19	19	0.000167729	0.000162195	0.967008	0.000146951	0.000146362	0.995992	0	1	1	0.511661	0	1	0	1
Q15029	EFTUD2	1	1	1	0	0	2.28919e-06	9.8908e-07	0.432065	7.05988e-07	NaN	NA	0	0	1	NA	0	1	0	1
Q15370	ELOB	8	8	4	3	2	9.48277e-06	9.57153e-06	1.00936	3.81165e-06	3.25921e-06	0.855064	0	0	1	0.759363	0	1	0	1
Q15392	DHCR24	2	2	0	1	0	1.30445e-06	1.32058e-06	1.01237	NaN	5.31169e-07	NA	0	0	1	NA	0	1	1	1
Q15404	RSU1	1	1	1	0	0	4.21384e-07	2.52479e-07	0.599166	2.37429e-07	NaN	NA	0	0	1	NA	0	1	0	1
Q15717,Q12926,P26378	ELAVL1,ELAVL2,ELAVL4	2	2	1	0	0	3.17232e-06	2.64508e-06	0.833801	3.87017e-06	NaN	NA	0	0	1	NA	0	1	0	1
Q15800	MSMO1	2	2	1	2	0	1.56352e-06	1.51295e-06	0.967653	3.36811e-07	1.29864e-06	3.85568	0	0	1	0.534056	0	1	1	1
Q2M2I5	KRT24	1	1	1	2	1	1.58162e-06	1.8062e-06	1.142	4.10221e-06	1.43732e-05	3.50376	0	0	1	0.573704	0	1	1	1
Q66K14,Q6ZT07	TBC1D9B,TBC1D9	1	1	1	0	0	2.78338e-07	1.24118e-07	0.445928	1.18694e-07	NaN	NA	0	0	1	NA	0	1	0	1
Q6P3W7	SCYL2	1	1	0	1	0	4.37049e-07	3.48759e-07	0.797986	NaN	3.43316e-07	NA	0	0	1	NA	0	1	1	1
Q6PKG0,Q659C4	LARP1,LARP1B	1	1	0	0	0	6.66296e-08	9.62781e-08	1.44498	NaN	NaN	NA	0	0	1	NA	0	1	0	1
Q6VY07	PACS1	1	1	0	1	0	6.805e-07	4.58029e-07	0.673077	NaN	7.41543e-07	NA	0	0	1	NA	0	1	1	1
Q6ZMP0	THSD4	1	1	1	0	0	2.59061e-07	4.0691e-07	1.57071	1.57981e-07	NaN	NA	0	0	1	NA	0	1	0	1
Q6ZVM7	TOM1L2	2	2	2	2	3	2.33432e-06	2.12692e-06	0.911152	1.60203e-06	1.75764e-06	1.09713	0	0	1	0.979277	0	1	0	1
Q7L5N1	COPS6	1	1	1	0	0	8.97915e-07	3.83206e-07	0.426773	6.23179e-07	NaN	NA	0	0	1	NA	0	1	0	1
Q8N3D4	EHBP1L1	1	1	0	0	0	1.04513e-07	5.97537e-08	0.571732	NaN	NaN	NA	0	0	1	NA	0	1	0	1
Q8NC56	LEMD2	1	1	0	0	0	2.63238e-06	1.42867e-06	0.54273	NaN	NaN	NA	0	0	1	NA	0	1	0	1
Q8NFP9	NBEA	1	1	0	1	0	1.14664e-06	7.7537e-07	0.676207	NaN	6.39829e-07	NA	0	0	1	NA	0	1	1	1
Q8NHP6	MOSPD2	1	1	1	0	0	4.44194e-07	3.9219e-07	0.882925	3.08814e-07	NaN	NA	0	0	1	NA	0	1	0	1
Q8TBC4	UBA3	1	1	0	1	0	1.56778e-06	1.00444e-06	0.640677	NaN	7.42712e-07	NA	0	0	1	NA	0	1	1	1
Q8WX93	PALLD	1	1	0	0	0	1.41826e-06	9.93399e-07	0.700436	NaN	NaN	NA	0	0	1	NA	0	1	0	1
Q92542	NCSTN	3	3	3	0	0	2.87232e-06	2.97227e-06	1.0348	2.13337e-06	NaN	NA	0	0	1	NA	0	1	0	0.230769
Q92623	TTC9	1	1	0	1	0	9.74862e-07	7.70433e-07	0.790299	NaN	2.94711e-06	NA	0	0	1	NA	0	1	1	1
Q93052	LPP	1	1	1	1	0	3.31864e-06	1.60432e-06	0.483426	1.74617e-06	1.88746e-06	1.08092	0	0	1	1	0	1	0	1
Q96DU7,P27987	ITPKC,ITPKB	1	1	0	1	0	1.20089e-06	4.39375e-07	0.365875	NaN	5.7111e-07	NA	0	0	1	NA	0	1	1	1
Q96JB5	CDK5RAP3	4	4	2	3	0	2.15149e-06	2.08886e-06	0.97089	1.02024e-06	1.54222e-06	1.51163	0	0	1	0.621115	0	1	1	1
Q99426	TBCB	1	1	1	0	0	6.40535e-07	5.35891e-07	0.83663	6.52543e-07	NaN	NA	0	0	1	NA	0	1	0	1
Q9BW60	ELOVL1	1	1	0	1	0	2.61695e-07	2.10598e-07	0.804746	NaN	1.09995e-06	NA	0	0	1	NA	0	1	1	1
Q9BVC6	TMEM109	1	1	0	1	0	7.90624e-06	7.05217e-06	0.891976	NaN	1.00537e-05	NA	0	0	1	NA	0	1	1	1
Q9BX68	HINT2	1	1	0	1	0	1.37342e-06	4.71946e-07	0.343627	NaN	3.20551e-06	NA	0	0	1	NA	0	1	1	1
Q9H098	FAM107B	1	1	0	1	0	3.12975e-07	4.64822e-07	1.48517	NaN	4.6204e-07	NA	0	0	1	NA	0	1	1	1
Q9H0R4	HDHD2	1	1	4	4	0	6.37935e-07	7.18002e-07	1.12551	2.29658e-06	2.05258e-06	0.893757	0	0	1	0.922895	0	1	0	1
Q9H1C7	CYSTM1	1	1	0	1	1	9.29663e-07	1.39928e-06	1.50515	NaN	1.73908e-06	NA	0	0	1	NA	0	1	1	1
Q9H3Z4	DNAJC5	1	1	1	0	0	7.9454e-07	9.90295e-07	1.24637	3.97556e-07	NaN	NA	0	0	1	NA	0	1	0	1
Q9H939	PSTPIP2	1	1	1	0	0	2.00876e-07	2.62567e-07	1.30711	3.34743e-07	NaN	NA	0	0	1	NA	0	1	0	1
Q9H9H4	VPS37B	1	1	0	2	1	2.98721e-07	3.52493e-07	1.18001	NaN	5.54073e-07	NA	0	0	1	NA	0	1	1	0.487179
Q9HA65	TBC1D17	1	1	0	1	0	2.80184e-07	4.04481e-07	1.44363	NaN	5.33781e-07	NA	0	0	1	NA	0	1	1	1
Q9HB71	CACYBP	1	1	1	0	1	5.51416e-07	5.38157e-07	0.975954	4.73989e-07	NaN	NA	0	0	1	NA	0	1	0	1
Q9HC35	EML4	1	1	3	0	0	1.35873e-07	1.03026e-07	0.758256	1.52834e-06	NaN	NA	0	0	1	NA	0	1	0	0.230769
Q9NWW6	NMRK1	1	1	0	0	1	2.89469e-07	8.74758e-08	0.302194	NaN	NaN	NA	0	0	1	NA	0	1	0	1
Q9NZD2	GLTP	20	19	19	18	18	0.000123412	0.00010884	0.881927	8.11898e-05	9.48314e-05	1.16802	0	1	1	0.239236	0	1	0	1
Q9P258	RCC2	1	1	0	1	0	6.55987e-07	6.21741e-07	0.947796	NaN	7.65148e-07	NA	0	0	1	NA	0	1	1	1
Q9P2B2	PTGFRN	1	1	1	1	0	7.35903e-06	5.53933e-06	0.752725	8.50949e-06	5.89918e-06	0.693247	0	0	1	1	0	1	0	1
Q9UBB4	ATXN10	1	1	0	1	0	6.33277e-07	3.82099e-07	0.603367	NaN	2.42105e-07	NA	0	0	1	NA	0	1	1	1
Q9UBH0	IL36RN	1	1	1	0	0	1.02121e-06	1.82385e-06	1.78596	1.19866e-06	NaN	NA	0	0	1	NA	0	1	0	1
Q9UI42	CPA4	1	1	0	1	3	1.85975e-06	1.45869e-06	0.784346	NaN	5.94798e-07	NA	0	0	1	NA	0	1	1	1
Q9UK76	JPT1	1	1	1	0	0	1.25932e-06	7.33821e-07	0.582713	1.26485e-06	NaN	NA	0	0	1	NA	0	1	0	1
Q9Y224	RTRAF	1	1	0	0	0	4.883e-07	2.54725e-07	0.521657	NaN	NaN	NA	0	0	1	NA	0	1	0	1
Q9Y230	RUVBL2	1	1	1	4	1	7.09811e-07	4.86218e-07	0.684997	1.68346e-06	2.87234e-06	1.70621	0	0	1	0.195486	0	1	1	0.341649
Q9Y259	CHKB	1	1	1	0	0	4.16078e-07	2.31572e-07	0.55656	5.06358e-07	NaN	NA	0	0	1	NA	0	1	0	1
Q9Y2D4	EXOC6B	1	1	0	1	0	4.4746e-07	2.21375e-07	0.494736	NaN	5.26413e-07	NA	0	0	1	NA	0	1	1	1
Q9Y394	DHRS7	2	2	6	10	6	2.83149e-06	4.30541e-06	1.52055	7.82872e-06	1.24923e-05	1.5957	0	0	1	0.278206	0	1	1	0.333213
Q9Y5B9	SUPT16H	1	1	1	0	0	1.26736e-07	1.50373e-07	1.18651	6.04869e-07	NaN	NA	0	0	1	NA	0	1	0	1
Q9Y5L0	TNPO3	1	1	1	0	0	3.08592e-08	1.03492e-07	3.35368	7.70508e-07	NaN	NA	0	0	1	NA	0	1	0	1
Q9Y5X3	SNX5	1	1	4	2	0	5.09749e-07	2.94478e-07	0.577692	2.66228e-06	2.10196e-06	0.789534	0	0	1	0.420565	0	1	0	0.66142
A0A075B6J9	IGLV2-18	1	0	0	0	0	6.5476e-07	NaN	NA	NaN	NaN	NA	0	0	NA	NA	0	1	0	1
A0A075B6Q5	IGHV3-64	1	0	0	0	0	5.35606e-07	NaN	NA	NaN	NaN	NA	0	0	NA	NA	0	1	0	1
A0A075B6R2,P0DP07,A0A087WSY4	IGHV4-4,IGHV4-31,IGHV4-30-2	1	0	0	0	0	1.84618e-07	NaN	NA	NaN	NaN	NA	0	0	NA	NA	0	1	0	1
A0A075B6S5	IGKV1-27	1	0	0	0	0	1.69818e-06	NaN	NA	NaN	NaN	NA	0	0	NA	NA	0	1	0	1
A0A087WSY6	IGKV3D-15	1	0	0	1	0	1.13012e-06	NaN	NA	NaN	5.1629e-07	NA	0	0	NA	NA	0	1	1	1
A0A0A0MS15	IGHV3-49	5	0	1	0	0	3.26977e-05	NaN	NA	2.03863e-06	NaN	NA	0	0	NA	NA	0	0.047124	0	1
A0A0B4J1U7	IGHV6-1	1	0	0	1	0	1.60792e-05	NaN	NA	NaN	3.98392e-06	NA	0	0	NA	NA	0	1	1	1
A0A0B4J1X5	IGHV3-74	4	0	14	12	8	6.82068e-05	NaN	NA	0.000189005	0.000102642	0.543067	0	0	NA	0.0701643	0	0.106029	0	0.741054
A0A0B4J1Y8	IGLV9-49	1	0	0	0	0	1.17259e-06	NaN	NA	NaN	NaN	NA	0	0	NA	NA	0	1	0	1
A0A0B4J1Y9	IGHV3-72	7	0	1	0	0	1.30791e-05	NaN	NA	2.85911e-06	NaN	NA	0	0	NA	NA	0	0.00831601	0	1
A0A0C4DH31	IGHV1-18	1	0	1	0	0	1.29332e-06	NaN	NA	2.3068e-06	NaN	NA	0	0	NA	NA	0	1	0	1
A0A0C4DH68	IGKV2-24	1	0	0	0	0	1.03998e-05	NaN	NA	NaN	NaN	NA	0	0	NA	NA	0	1	0	1
A2NJV5,A0A075B6S2	IGKV2-29,IGKV2D-29	1	0	0	0	0	3.34477e-07	NaN	NA	NaN	NaN	NA	0	0	NA	NA	0	1	0	1
A5D8V7	CCDC151	1	0	0	0	0	8.78679e-08	NaN	NA	NaN	NaN	NA	0	0	NA	NA	0	1	0	1
A6NDU8	C5orf51	1	0	0	0	0	9.94303e-09	NaN	NA	NaN	NaN	NA	0	0	NA	NA	0	1	0	1
A6NGR9	MROH6	1	0	0	0	0	2.23668e-07	NaN	NA	NaN	NaN	NA	0	0	NA	NA	0	1	0	1
O00116	AGPS	1	0	1	0	0	2.44429e-07	NaN	NA	9.53377e-08	NaN	NA	0	0	NA	NA	0	1	0	1
O00178	GTPBP1	1	0	1	0	0	1.62344e-07	NaN	NA	2.95971e-07	NaN	NA	0	0	NA	NA	0	1	0	1
O00182,Q6DKI2,Q3B8N2	LGALS9,LGALS9C,LGALS9B	1	0	0	0	0	8.80335e-07	NaN	NA	NaN	NaN	NA	0	0	NA	NA	0	1	0	1
O00186	STXBP3	1	0	1	1	0	8.62971e-07	NaN	NA	1.63853e-06	1.30449e-06	0.796134	0	0	NA	1	0	1	0	1
O00217	NDUFS8	2	0	1	0	0	1.14801e-06	NaN	NA	1.44522e-06	NaN	NA	0	0	NA	NA	0	0.487179	0	1
O00330	PDHX	1	0	0	0	0	3.192e-08	NaN	NA	NaN	NaN	NA	0	0	NA	NA	0	1	0	1
O00418	EEF2K	1	0	0	0	0	1.92996e-07	NaN	NA	NaN	NaN	NA	0	0	NA	NA	0	1	0	1
O00471	EXOC5	1	0	1	0	0	4.56796e-07	NaN	NA	1.60145e-07	NaN	NA	0	0	NA	NA	0	1	0	1
O00479	HMGN4	1	0	0	0	0	3.91819e-08	NaN	NA	NaN	NaN	NA	0	0	NA	NA	0	1	0	1
O00483	NDUFA4	1	0	1	0	0	2.28669e-06	NaN	NA	7.31904e-06	NaN	NA	0	0	NA	NA	0	1	0	1
O00505	KPNA3	1	0	1	0	0	4.44388e-07	NaN	NA	4.61621e-07	NaN	NA	0	0	NA	NA	0	1	0	1
O00541	PES1	1	0	0	0	0	5.48881e-08	NaN	NA	NaN	NaN	NA	0	0	NA	NA	0	1	0	1
O00584	RNASET2	1	0	2	1	0	4.14408e-07	NaN	NA	6.9226e-06	2.9004e-06	0.418975	0	0	NA	0.573704	0	1	0	1
O00754	MAN2B1	1	0	0	1	0	1.2734e-07	NaN	NA	NaN	1.30731e-06	NA	0	0	NA	NA	0	1	1	1
O14545	TRAFD1	3	0	0	0	0	8.14167e-07	NaN	NA	NaN	NaN	NA	0	0	NA	NA	0	0.230769	0	1
O14683	TP53I11	1	0	0	0	0	4.64048e-07	NaN	NA	NaN	NaN	NA	0	0	NA	NA	0	1	0	1
O14791	APOL1	2	0	0	0	0	8.20021e-07	NaN	NA	NaN	NaN	NA	0	0	NA	NA	0	0.487179	0	1
O14896	IRF6	2	0	1	0	0	1.39979e-06	NaN	NA	1.33247e-06	NaN	NA	0	0	NA	NA	0	0.487179	0	1
O14920	IKBKB	1	0	1	0	0	2.29655e-07	NaN	NA	3.83564e-07	NaN	NA	0	0	NA	NA	0	1	0	1
O14964	HGS	1	0	1	0	0	5.11068e-07	NaN	NA	4.90467e-07	NaN	NA	0	0	NA	NA	0	1	0	1
O14979	HNRNPDL	1	0	1	0	0	1.08514e-06	NaN	NA	2.25813e-06	NaN	NA	0	0	NA	NA	0	1	0	1
O15021	MAST4	1	0	0	0	0	1.5589e-07	NaN	NA	NaN	NaN	NA	0	0	NA	NA	0	1	0	1
O15027	SEC16A	1	0	1	0	0	4.62083e-07	NaN	NA	5.32279e-07	NaN	NA	0	0	NA	NA	0	1	0	1
O15042	U2SURP	1	0	0	0	0	5.1958e-07	NaN	NA	NaN	NaN	NA	0	0	NA	NA	0	1	0	1
O15118	NPC1	1	0	0	0	0	4.35954e-07	NaN	NA	NaN	NaN	NA	0	0	NA	NA	0	1	0	1
O15195	VILL	1	0	0	0	0	3.60242e-07	NaN	NA	NaN	NaN	NA	0	0	NA	NA	0	1	0	1
O15258	RER1	2	0	5	3	2	1.82946e-06	NaN	NA	6.63172e-06	4.46196e-06	0.67282	0	0	NA	0.510439	0	0.487179	0	0.694765
O15382	BCAT2	2	0	0	1	0	3.86828e-06	NaN	NA	NaN	2.84956e-06	NA	0	0	NA	NA	0	0.487179	1	1
O15484	CAPN5	5	0	0	0	0	4.30768e-06	NaN	NA	NaN	NaN	NA	0	0	NA	NA	0	0.047124	0	1
O43143	DHX15	1	0	0	0	0	9.49325e-07	NaN	NA	NaN	NaN	NA	0	0	NA	NA	0	1	0	1
O43150,Q9ULH1	ASAP2,ASAP1	1	0	0	0	0	5.49121e-07	NaN	NA	NaN	NaN	NA	0	0	NA	NA	0	1	0	1
O43237,Q9Y6G9	DYNC1LI2,DYNC1LI1	6	0	0	0	0	3.22103e-06	NaN	NA	NaN	NaN	NA	0	0	NA	NA	0	0.020196	0	1
O43264	ZW10	1	0	0	0	0	1.12291e-07	NaN	NA	NaN	NaN	NA	0	0	NA	NA	0	1	0	1
O43314,Q6PFW1	PPIP5K2,PPIP5K1	1	0	0	0	0	2.00386e-08	NaN	NA	NaN	NaN	NA	0	0	NA	NA	0	1	0	1
O43399	TPD52L2	1	0	1	2	0	8.49247e-07	NaN	NA	1.71412e-06	1.54525e-06	0.901484	0	0	NA	0.614695	0	1	1	1
O43447	PPIH	1	0	0	0	0	7.93776e-07	NaN	NA	NaN	NaN	NA	0	0	NA	NA	0	1	0	1
O43520	ATP8B1	1	0	0	0	0	1.8849e-07	NaN	NA	NaN	NaN	NA	0	0	NA	NA	0	1	0	1
O43583	DENR	1	0	0	0	0	8.52584e-07	NaN	NA	NaN	NaN	NA	0	0	NA	NA	0	1	0	1
O43586	PSTPIP1	1	0	1	0	0	2.5983e-07	NaN	NA	2.54569e-07	NaN	NA	0	0	NA	NA	0	1	0	1
O43617	TRAPPC3	1	0	0	1	0	6.9538e-07	NaN	NA	NaN	4.85276e-07	NA	0	0	NA	NA	0	1	1	1
O43657	TSPAN6	1	0	0	0	0	6.8273e-07	NaN	NA	NaN	NaN	NA	0	0	NA	NA	0	1	0	1
O43670	ZNF207	2	0	1	0	0	1.37949e-06	NaN	NA	1.39181e-06	NaN	NA	0	0	NA	NA	0	0.487179	0	1
O43760	SYNGR2	2	0	1	0	0	2.22214e-06	NaN	NA	2.88555e-06	NaN	NA	0	0	NA	NA	0	0.487179	0	1
O43795,Q9UBC5	MYO1B,MYO1A	1	0	0	1	0	6.47638e-07	NaN	NA	NaN	4.76688e-07	NA	0	0	NA	NA	0	1	1	1
O43837	IDH3B	1	0	1	1	0	3.90524e-07	NaN	NA	1.55781e-07	2.56215e-07	1.64472	0	0	NA	1	0	1	0	1
O43865	AHCYL1	4	0	0	0	0	8.35637e-06	NaN	NA	NaN	NaN	NA	0	0	NA	NA	0	0.106029	0	1
O60220	TIMM8A	1	0	0	1	0	4.02735e-07	NaN	NA	NaN	3.12375e-07	NA	0	0	NA	NA	0	1	1	1
O60256	PRPSAP2	2	0	1	1	0	5.72743e-07	NaN	NA	3.33326e-07	4.81457e-08	0.14444	0	0	NA	1	0	0.487179	0	1
O60264,P28370	SMARCA5,SMARCA1	1	0	0	0	0	5.7911e-08	NaN	NA	NaN	NaN	NA	0	0	NA	NA	0	1	0	1
O60449	LY75	1	0	0	1	0	2.20249e-06	NaN	NA	NaN	2.05546e-06	NA	0	0	NA	NA	0	1	1	1
O60493	SNX3	1	0	1	0	0	3.69017e-07	NaN	NA	5.72273e-07	NaN	NA	0	0	NA	NA	0	1	0	1
O60603	TLR2	1	0	1	0	0	1.7886e-07	NaN	NA	2.23564e-07	NaN	NA	0	0	NA	NA	0	1	0	1
O60684,O15131	KPNA6,KPNA5	1	0	0	0	0	3.21614e-07	NaN	NA	NaN	NaN	NA	0	0	NA	NA	0	1	0	1
O60749	SNX2	2	0	1	2	0	1.18634e-06	NaN	NA	1.63561e-06	3.17237e-06	1.93956	0	0	NA	0.573704	0	0.487179	1	1
O60762	DPM1	1	0	0	2	0	2.06547e-08	NaN	NA	NaN	8.24658e-07	NA	0	0	NA	NA	0	1	1	0.487179
O60841	EIF5B	1	0	0	0	0	2.30221e-07	NaN	NA	NaN	NaN	NA	0	0	NA	NA	0	1	0	1
O75146	HIP1R	2	0	0	0	0	6.41284e-07	NaN	NA	NaN	NaN	NA	0	0	NA	NA	0	0.487179	0	1
O75157	TSC22D2	1	0	0	0	0	6.50608e-08	NaN	NA	NaN	NaN	NA	0	0	NA	NA	0	1	0	1
O75170	PPP6R2	1	0	0	0	0	3.98804e-08	NaN	NA	NaN	NaN	NA	0	0	NA	NA	0	1	0	1
O75208	COQ9	1	0	0	0	0	1.59816e-06	NaN	NA	NaN	NaN	NA	0	0	NA	NA	0	1	0	1
O75251	NDUFS7	1	0	1	0	0	7.13526e-07	NaN	NA	1.38032e-06	NaN	NA	0	0	NA	NA	0	1	0	1
O75400	PRPF40A	1	0	0	0	1	3.77311e-07	NaN	NA	NaN	NaN	NA	0	0	NA	NA	0	1	0	1
O75431	MTX2	1	0	0	0	0	4.53333e-07	NaN	NA	NaN	NaN	NA	0	0	NA	NA	0	1	0	1
O75439	PMPCB	1	0	0	0	0	2.69553e-07	NaN	NA	NaN	NaN	NA	0	0	NA	NA	0	1	0	1
O75489	NDUFS3	4	0	1	0	0	2.14154e-06	NaN	NA	4.74278e-06	NaN	NA	0	0	NA	NA	0	0.106029	0	1
O75534	CSDE1	1	0	0	0	0	2.70111e-07	NaN	NA	NaN	NaN	NA	0	0	NA	NA	0	1	0	1
O75558	STX11	1	0	0	1	0	3.55596e-07	NaN	NA	NaN	3.56967e-07	NA	0	0	NA	NA	0	1	1	1
O75563	SKAP2	1	0	1	0	0	3.40956e-07	NaN	NA	1.81236e-06	NaN	NA	0	0	NA	NA	0	1	0	1
O75569	PRKRA	1	0	1	0	0	1.86044e-07	NaN	NA	2.95849e-07	NaN	NA	0	0	NA	NA	0	1	0	1
O75663	TIPRL	1	0	0	0	0	6.28608e-07	NaN	NA	NaN	NaN	NA	0	0	NA	NA	0	1	0	1
O75688	PPM1B	1	0	0	0	0	2.88882e-07	NaN	NA	NaN	NaN	NA	0	0	NA	NA	0	1	0	1
O75694	NUP155	1	0	0	1	0	2.30075e-07	NaN	NA	NaN	1.32578e-07	NA	0	0	NA	NA	0	1	1	1
[truncated: 1,699 more rows]
